# Supplementary material
Source: PubMed Central journal article supplement (PMC4807277)
Supplement: 10.1074_M115.699660_jbc.M115.699660-1.pdf [file 10.1074_M115.699660_jbc.M115.699660-1.pdf]

Peak List Generator: unknown  
Version: unknown  
Charge States Calculated: unknown  
Deisotoped: unknown  
Textual Annotation: unknown

Database Set: 1 Database  
Database Name: The Uni-mouse-Reference-20131008 database  
Version: unknown  
Taxonomy: All Entries  
Number of Proteins: 43284

Does database contain common contaminants?: unknown  
Search Engine Set: 1 Search Engine  
Search Engine: Mascot  
Version: 2.3.02

Samples: All Samples  
Fragment Tolerance: 0.100 Da (Monoisotopic)  
Parent Tolerance: 25 PPM (Monoisotopic)  
Fixed Modifications: +57 on C (Carbamidomethyl)  
Variable Modifications: +16 on M (Oxidation)  
Database: The Uni-mouse-Reference-20131008 database (unknown version, 43284 entries)  
Digestion Enzyme: Trypsin  
Max Missed Cleavages: 4  
Probability Model:

Scaffold: Version: Scaffold\_4.3.0  
Modification Metadata Set: 0 modifications  
Source: None  
Comment:

Protein Grouping Strategy: MS-sample specific grouping with binary peptide-protein weights  
Peptide Threshold: 95.0% minimum  
Protein Threshold: 95.0% minimum and 1 peptide minimum  
Peptide FDR: 0.4% (Prophet)  
Protein FDR: 0.6% (Prophet)  
GO Annotation Source(s):

MA-004-UI Displaying: Exclusive Spectrum Count

| #   | Visible? | Starred? | Identified Proteins (2504)                                                                                                         |
|-----|----------|----------|------------------------------------------------------------------------------------------------------------------------------------|
| 1   | TRUE     | Empty    | A kinase anchor protein 4 OS-Mus musculus GN-Akaap1 PE-1 SV-1                                                                      |
| 2   | TRUE     | Empty    | Tubulin beta-4B chain OS-Mus musculus GN-Tub4b PE-1 SV-1                                                                           |
| 3   | TRUE     | Empty    | Fibrous sheath-interacting protein 2 OS-Mus musculus GN-Fsfp2 PE-1 SV-3                                                            |
| 4   | TRUE     | Empty    | Myosin 10 OS-Mus musculus GN-My10 PE-2 SV-1                                                                                        |
| 5   | TRUE     | Empty    | Protein G14569 OS-Mus musculus GN-G14569 PE-4 SV-1                                                                                 |
| 6   | TRUE     | Empty    | Outer dense fiber protein 2 OS-Mus musculus GN-ODf2 PE-2 SV-1                                                                      |
| 7   | TRUE     | Empty    | Actin, cytoplasmic 2 OS-Mus musculus GN-Actg1 PE-1 SV-1                                                                            |
| 8   | TRUE     | Empty    | Plectin OS-Mus musculus GN-Plex PE-2 SV-1                                                                                          |
| 9   | TRUE     | Empty    | Vimentin OS-Mus musculus GN-Vim PE-1 SV-3                                                                                          |
| 10  | TRUE     | Empty    | Heat shock-related 70 kDa protein 2 OS-Mus musculus GN-Hsp2 PE-1 SV-2                                                              |
| 11  | TRUE     | Empty    | Plectin OS-Mus musculus GN-Plex PE-2 SV-1                                                                                          |
| 12  | TRUE     | Empty    | Histone H4 OS-Mus musculus GN-HistH4a PE-1 SV-2                                                                                    |
| 13  | TRUE     | Empty    | Nesprin 2 OS-Mus musculus GN-Nes2 PE-1 SV-2                                                                                        |
| 14  | TRUE     | Empty    | A kinase anchor protein 3 OS-Mus musculus GN-Akaap1 PE-1 SV-2                                                                      |
| 15  | TRUE     | Empty    | SH3 domain-containing protein 21 OS-Mus musculus GN-Sb321 PE-1 SV-1                                                                |
| 16  | TRUE     | Empty    | DNA topoisomerase 2-alpha OS-Mus musculus GN-Top2a PE-1 SV-2                                                                       |
| 17  | TRUE     | Empty    | Protein Axl11 OS-Mus musculus GN-Axl11 PE-2 SV-1                                                                                   |
| 18  | TRUE     | Empty    | Tubulin alpha-3 chain OS-Mus musculus GN-Tuba3a PE-1 SV-1                                                                          |
| 19  | TRUE     | Empty    | Histone H2B type 1-f/J/L OS-Mus musculus GN-HistH2bm PE-1 SV-2                                                                     |
| 20  | TRUE     | Empty    | Phosphoglycerate kinase 2 OS-Mus musculus GN-Pgk2 PE-1 SV-4                                                                        |
| 21  | TRUE     | Empty    | E3 ubiquitin-protein ligase Trim36 OS-Mus musculus GN-Trim36 PE-2 SV-1                                                             |
| 22  | TRUE     | Empty    | Myosin-9 OS-Mus musculus GN-My9 PE-1 SV-4                                                                                          |
| 23  | TRUE     | Empty    | Sperm-associated antigen 17 OS-Mus musculus GN-Sag17 PE-4 SV-1                                                                     |
| 24  | TRUE     | Empty    | Mein heavy chain 17, axonemal OS-Mus musculus GN-Dnah17 PE-4 SV-1                                                                  |
| 25  | TRUE     | Empty    | Poly (ADP-ribose) polymerase family, member 1 OS-Mus musculus GN-Parp1 PE-2 SV-1                                                   |
| 26  | TRUE     | Empty    | Kinesin-like protein KIF27 OS-Mus musculus GN-Kif27 PE-1 SV-1                                                                      |
| 27  | TRUE     | Empty    | Heterogeneous nuclear ribonucleoprotein M OS-Mus musculus GN-Hrmpm PE-1 SV-3                                                       |
| 28  | TRUE     | Empty    | Heterogeneous nuclear ribonucleoprotein U OS-Mus musculus GN-Hrmpu PE-1 SV-1                                                       |
| 29  | TRUE     | Empty    | Unconventional myosin-Id OS-Mus musculus GN-Myoid1 PE-1 SV-1                                                                       |
| 30  | TRUE     | Empty    | Unconventional myosin-Vita OS-Mus musculus GN-Myv7a PE-1 SV-2                                                                      |
| 31  | TRUE     | Empty    | L-lactate dehydrogenase C chain OS-Mus musculus GN-LDlc PE-1 SV-2                                                                  |
| 32  | TRUE     | Empty    | Glucosyltransferase 3-phosphate dehydrogenase, testis-specific OS-Mus musculus GN-Hgph3 PE-1 SV-1                                  |
| 33  | TRUE     | Empty    | Outer dense fiber protein 1 OS-Mus musculus GN-ODf1 PE-2 SV-1                                                                      |
| 34  | TRUE     | Empty    | E3 SUMO1 protein ligase RanBP2 OS-Mus musculus GN-Ranbp2 PE-1 SV-2                                                                 |
| 35  | TRUE     | Empty    | Endoplasmic OS-Mus musculus GN-Hsp90b1 PE-1 SV-2                                                                                   |
| 36  | TRUE     | Empty    | Testis-specific serine kinase substrate OS-Mus musculus GN-Tsk PE-1 SV-4                                                           |
| 37  | TRUE     | Empty    | Sequestosome-1 OS-Mus musculus GN-Sqstm1 PE-1 SV-1                                                                                 |
| 38  | TRUE     | Empty    | Microtubule-associated protein 18 OS-Mus musculus GN-Map1b PE-1 SV-2                                                               |
| 39  | TRUE     | Empty    | Kinesin-like protein KIF2A OS-Mus musculus GN-Kif2a PE-1 SV-2                                                                      |
| 40  | TRUE     | Empty    | Histone H2A type 2-C OS-Mus musculus GN-H2a PE-1 SV-2                                                                              |
| 41  | TRUE     | Empty    | Y box protein 2 OS-Mus musculus GN-Ybx2 PE-2 SV-1                                                                                  |
| 42  | TRUE     | Empty    | Heat shock protein HSP 90-alpha OS-Mus musculus GN-Hsp90a1 PE-1 SV-4                                                               |
| 43  | TRUE     | Empty    | Glucosyltransferase 5-transferase Aa5 OS-Mus musculus GN-Gtm5 PE-1 SV-1                                                            |
| 44  | TRUE     | Empty    | Calcin OS-Mus musculus GN-Calc PE-2 SV-1                                                                                           |
| 45  | TRUE     | Empty    | Heat shock 70 kDa protein 4L OS-Mus musculus GN-Hsp4l PE-1 SV-2                                                                    |
| 46  | TRUE     | Empty    | Unconventional myosin-Vi OS-Mus musculus GN-Myvi PE-2 SV-1                                                                         |
| 47  | TRUE     | Empty    | MGJ12871 OS-Mus musculus GN-Tk1 PE-1 SV-1                                                                                          |
| 48  | TRUE     | Empty    | Polysialinate-binding protein 1 OS-Mus musculus GN-Polbs1 PE-1 SV-2                                                                |
| 49  | TRUE     | Empty    | Dynein heavy chain 8, axonemal OS-Mus musculus GN-Dnah8 PE-2 SV-1                                                                  |
| 50  | TRUE     | Empty    | 78 kDa glucose-regulated protein OS-Mus musculus GN-Hsp2 PE-1 SV-3                                                                 |
| 51  | TRUE     | Empty    | Actin-binding protein kinase TEX14 OS-Mus musculus GN-Te14 PE-1 SV-2                                                               |
| 52  | TRUE     | Empty    | Phospholipid hydroperoxide glutathione peroxidase, mitochondrial OS-Mus musculus GN-Gpx4 PE-1 SV-4                                 |
| 53  | TRUE     | Empty    | Centrosomal protein of 55 kDa OS-Mus musculus GN-Cep55 PE-1 SV-2                                                                   |
| 54  | TRUE     | Empty    | SWI/SNF-related matrix-associated actin-dependent regulator of chromatin subfamily A member 5 OS-Mus musculus GN-Smarca5 PE-1 SV-1 |
| 55  | TRUE     | Empty    | 55 kDa SES3-interacting protein OS-Mus musculus GN-Sip3 PE-1 SV-1                                                                  |
| 56  | TRUE     | Empty    | Tektin1 OS-Mus musculus GN-Tek1 PE-2 SV-1                                                                                          |
| 57  | TRUE     | Empty    | Lamin-B1 OS-Mus musculus GN-Lmb1 PE-1 SV-3                                                                                         |
| 58  | TRUE     | Empty    | Trifunctional enzyme subunit alpha, mitochondrial OS-Mus musculus GN-Hadha PE-1 SV-1                                               |
| 59  | TRUE     | Empty    | Ubiquitin carboxyl-terminal hydrolase OS-Mus musculus GN-Hsc17 PE-2 SV-1                                                           |
| 60  | TRUE     | Empty    | Elongation factor 1-alpha OS-Mus musculus GN-Ef1a1 PE-1 SV-3                                                                       |
| 61  | TRUE     | Empty    | Transcription factor A, mitochondrial OS-Mus musculus GN-Tfam PE-1 SV-2                                                            |
| 62  | TRUE     | Empty    | Voltage-dependent anion-selective channel protein 2 [Fragment] OS-Mus musculus GN-Vdac2 PE-4 SV-1                                  |
| 63  | TRUE     | Empty    | Testin-2 OS-Mus musculus GN-Hsp42 PE-2 SV-1                                                                                        |
| 64  | TRUE     | Empty    | Core histone macroH2A.1 OS-Mus musculus GN-H2a1 PE-1 SV-3                                                                          |
| 65  | TRUE     | Empty    | Serine/arginine-rich splicing factor 1 OS-Mus musculus GN-Srsf1 PE-1 SV-3                                                          |
| 66  | TRUE     | Empty    | Myosin-11 OS-Mus musculus GN-My11 PE-1 SV-1                                                                                        |
| 67  | TRUE     | Empty    | Elongation factor 1-gamma OS-Mus musculus GN-Ef1g PE-1 SV-3                                                                        |
| 68  | TRUE     | Empty    | Heat shock 70 kDa protein 1-like OS-Mus musculus GN-Hsp1l PE-2 SV-4                                                                |
| 69  | TRUE     | Empty    | Probable ATP-dependent RNA helicase DDX5 OS-Mus musculus GN-Ddx5 PE-1 SV-2                                                         |
| 70  | TRUE     | Empty    | Malin3 OS-Mus musculus GN-Mal3 PE-1 SV-1                                                                                           |
| 71  | TRUE     | Empty    | Transitional endoplasmic reticulum ATPase OS-Mus musculus GN-Vcp PE-1 SV-4                                                         |
| 72  | TRUE     | Empty    | Protein Spata31d1 OS-Mus musculus GN-Spata31d1 PE-4 SV-1                                                                           |
| 73  | TRUE     | Empty    | 60S ribosomal protein L4 OS-Mus musculus GN-RpL4 PE-1 SV-3                                                                         |
| 74  | TRUE     | Empty    | Histone H2B type 1-A OS-Mus musculus GN-HistH2ba PE-1 SV-3                                                                         |
| 75  | TRUE     | Empty    | Testis-specific gene 10 protein OS-Mus musculus GN-Tg10 PE-1 SV-1                                                                  |
| 76  | TRUE     | Empty    | Pwi-like protein 1 OS-Mus musculus GN-Pwi1 PE-1 SV-1                                                                               |
| 77  | TRUE     | Empty    | RIM5-binding protein 3 OS-Mus musculus GN-Rimbp3 PE-2 SV-1                                                                         |
| 78  | TRUE     | Empty    | Mechanistic DNA damage checkpoint protein 1 OS-Mus musculus GN-Mdc1 PE-2 SV-1                                                      |
| 79  | TRUE     | Empty    | ATP-dependent RNA helicase A OS-Mus musculus GN-Dhxa9 PE-2 SV-1                                                                    |
| 80  | TRUE     | Empty    | 40S ribosomal protein S8 OS-Mus musculus GN-Rps8 PE-1 SV-2                                                                         |
| 81  | TRUE     | Empty    | Importin 5 OS-Mus musculus GN-Ip5 PE-1 SV-3                                                                                        |
| 82  | TRUE     | Empty    | Protein disulfide-isomerase A3 OS-Mus musculus GN-Pdia3 PE-1 SV-2                                                                  |
| 83  | TRUE     | Empty    | Protein FAM71B OS-Mus musculus GN-Fam71b PE-2 SV-3                                                                                 |
| 84  | TRUE     | Empty    | Nuclear protein 56 OS-Mus musculus GN-Nhp56 PE-1 SV-2                                                                              |
| 85  | TRUE     | Empty    | 60S ribosomal protein L8 OS-Mus musculus GN-RpL8 PE-1 SV-3                                                                         |
| 86  | TRUE     | Empty    | Tektin 2 OS-Mus musculus GN-Tk2 PE-2 SV-1                                                                                          |
| 87  | TRUE     | Empty    | Spermatid-specific manchette-related protein 1 OS-Mus musculus GN-Smrl1 PE-1 SV-1                                                  |
| 88  | TRUE     | Empty    | 40S ribosomal protein S3 OS-Mus musculus GN-Rps3 PE-1 SV-1                                                                         |
| 89  | TRUE     | Empty    | Valine-tRNA ligase OS-Mus musculus GN-Vars PE-2 SV-1                                                                               |
| 90  | TRUE     | Empty    | Perforin-gamma-inducible CTXase ligase protein OS-Mus musculus GN-Itgri1 PE-4 SV-1                                                 |
| 91  | TRUE     | Empty    | ATP-dependent RNA helicase DDX1 OS-Mus musculus GN-Ddx1 PE-1 SV-1                                                                  |
| 92  | TRUE     | Empty    | Cytoplasmic dynein 1 heavy chain 1 OS-Mus musculus GN-Dync1h1 PE-1 SV-2                                                            |
| 93  | TRUE     | Empty    | Nucleolin OS-Mus musculus GN-Ncl PE-1 SV-2                                                                                         |
| 94  | TRUE     | Empty    | Pyrivate kinase PKM OS-Mus musculus GN-Pkm PE-1 SV-4                                                                               |
| 95  | TRUE     | Empty    | Glycerol 3-phosphate dehydrogenase, mitochondrial OS-Mus musculus GN-Gpd2 PE-1 SV-2                                                |
| 96  | TRUE     | Empty    | DNA ligase OS-Mus musculus GN-Lig3 PE-2 SV-1                                                                                       |
| 97  | TRUE     | Empty    | Centromere protein V OS-Mus musculus GN-Cenp PE-2 SV-2                                                                             |
| 98  | TRUE     | Empty    | Elongation factor 1-delta [Fragment] OS-Mus musculus GN-Ef1d PE-2 SV-1                                                             |
| 99  | TRUE     | Empty    | Voltage-dependent anion-selective channel protein 3 OS-Mus musculus GN-Vdac3 PE-1 SV-1                                             |
| 100 | TRUE     | Empty    | Protein SON OS-Mus musculus GN-Son PE-2 SV-1                                                                                       |
| 101 | TRUE     | Empty    | DNA topoisomerase 1 OS-Mus musculus GN-Top1 PE-1 SV-2                                                                              |
| 102 | TRUE     | Empty    | Prelamin-A/C OS-Mus musculus GN-Lmna PE-1 SV-2                                                                                     |
| 103 | TRUE     | Empty    | Mitochondrial inner membrane protein OS-Mus musculus GN-Immt PE-1 SV-1                                                             |
| 104 | TRUE     | Empty    | Cytosolic 5'-nucleotidase 1B OS-Mus musculus GN-Ntc1b PE-2 SV-2                                                                    |
| 105 | TRUE     | Empty    | Protein Numal OS-Mus musculus GN-Numal PE-2 SV-1                                                                                   |
| 106 | TRUE     | Empty    | Outer dense fiber protein 3 OS-Mus musculus GN-ODf3 PE-1 SV-2                                                                      |
| 107 | TRUE     | Empty    | Succinyl-CoA:3-ketoacid coenzyme A transferase 2A, mitochondrial OS-Mus musculus GN-Oxct2a PE-2 SV-2                               |
| 108 | TRUE     | Empty    | Tropomyosin alpha 3 chain OS-Mus musculus GN-Tpm3 PE-2 SV-1                                                                        |
| 109 | TRUE     | Empty    | Tektin 1 OS-Mus musculus GN-Tek1 PE-2 SV-1                                                                                         |
| 110 | TRUE     | Empty    | Bromodomain adjacent to zinc finger domain protein 1 OS-Mus musculus GN-Baz1a PE-2 SV-1                                            |
| 111 | TRUE     | Empty    | T-complex protein 1 subunit alpha OS-Mus musculus GN-Tcp1 PE-1 SV-3                                                                |
| 112 | TRUE     | Empty    | Clathrin heavy chain 1 OS-Mus musculus GN-Chc PE-1 SV-3                                                                            |
| 113 | TRUE     | Empty    | EF-hand calcium-binding domain-containing protein 6 OS-Mus musculus GN-Efca6 PE-1 SV-2                                             |

Ma\_004\_3140\_2121\_01 (F293244): Peptide Prophet with Delta Mass Correction [+1,+2,+3,+4,+5,+6,+7,+8 and above]  
Ma\_004\_3140\_2121\_02 (F293245): Peptide Prophet with Delta Mass Correction [+1,+2,+3,+4,+5,+6,+7,+8 and above]

4bVAsA SP WT SPD

| Accession     | Molecular Weight | Protein | Gr  | Fold  | Chang   | Taxonomy | 4bVAsA SP | WT  | SPD |
|---------------|------------------|---------|-----|-------|---------|----------|-----------|-----|-----|
| sp Q5069294   | kDa              |         | 0%  | (0.7) | unknown |          | 374       | 528 |     |
| sp P68372     | 50 kDa           | TRUE    | 0%  | (1.0) | unknown |          | 383       | 387 |     |
| sp A2A2R3785  | kDa              | TRUE    | 0%  | (0.8) | unknown |          | 284       | 371 |     |
| tr Q3UH9233   | kDa              | TRUE    | 0%  | (0.9) | unknown |          | 313       | 366 |     |
| tr E9QDQ5     | 81 kDa           | TRUE    | 0%  | (0.8) | unknown |          | 285       | 351 |     |
| tr A3KW61     | kDa              | TRUE    | 0%  | (0.7) | unknown |          | 257       | 363 |     |
| sp P63260     | 42 kDa           | TRUE    | 0%  | (0.7) | unknown |          | 246       | 372 |     |
| tr E9QNH9     | 534 kDa          | FALSE   | 95% | (0.0) | unknown |          | 0         | 503 |     |
| sp P2152      | 54 kDa           | TRUE    | 0%  | (0.7) | unknown |          | 262       | 304 |     |
| sp P17156     | 70 kDa           | TRUE    | 0%  | (0.8) | unknown |          | 235       | 291 |     |
| tr E9PY96     | 1517 kDa         | TRUE    | 95% | (INF) | unknown |          | 414       | 0   |     |
| sp P62806     | 11 kDa           | TRUE    | 0%  | (0.8) | unknown |          | 162       | 211 |     |
| sp Q62W0783   | kDa              | TRUE    | 0%  | (0.6) | unknown |          | 185       | 227 |     |
| sp Q88987     | 96 kDa           | TRUE    | 0%  | (1.0) | unknown |          | 181       | 184 |     |
| sp Q175560    | kDa              | TRUE    | 0%  | (1.0) | unknown |          | 194       | 201 |     |
| sp Q31301373  | kDa              | TRUE    | 0%  | (0.9) | unknown |          | 144       | 165 |     |
| tr Q95Y11     | 131 kDa          | TRUE    | 0%  | (0.8) | unknown |          | 136       | 172 |     |
| sp P05214     | 50 kDa           | TRUE    | 0%  | (0.8) | unknown |          | 153       | 182 |     |
| sp P10851     | 34 kDa           | TRUE    | 0%  | (0.6) | unknown |          | 112       | 191 |     |
| sp P09041     | 45 kDa           | TRUE    | 0%  | (0.9) | unknown |          | 133       | 154 |     |
| tr Q95J00     | 81 kDa           | TRUE    | 0%  | (0.8) | unknown |          | 117       | 150 |     |
| sp Q8VDD      | 226 kDa          | TRUE    | 0%  | (1.0) | unknown |          | 124       | 119 |     |
| tr Q3UW7      | 263 kDa          | TRUE    | 0%  | (0.7) | unknown |          | 92        | 129 |     |
| tr E9IWA05123 | kDa              | TRUE    | 0%  | (0.8) | unknown |          | 96        | 123 |     |
| tr Q92142     | 113 kDa          | TRUE    | 0%  | (0.9) | unknown |          | 127       | 135 |     |
| sp Q7M62      | 159 kDa          | TRUE    | 0%  | (0.8) | unknown |          | 118       | 139 |     |
| sp Q9D06      | 178 kDa          | TRUE    | 0%  | (1.0) | unknown |          | 116       | 120 |     |
| sp Q8VE4      | 338 kDa          | TRUE    | 0%  | (0.9) | unknown |          | 103       | 113 |     |
| sp Q95YD0     | 116 kDa          | TRUE    | 0%  | (0.8) | unknown |          | 89        | 109 |     |
| sp P97479     | 255 kDa          | TRUE    | 0%  | (0.8) | unknown |          | 91        | 108 |     |
| sp P03342     | 36 kDa           | TRUE    | 0%  | (0.8) | unknown |          | 100       | 133 |     |
| sp E6440      | 748 kDa          | TRUE    | 0%  | (0.7) | unknown |          | 86        | 132 |     |
| sp E61999     | 28 kDa           | TRUE    | 0%  | (0.7) | unknown |          | 86        | 119 |     |
| sp Q9ERU6     | 341 kDa          | TRUE    | 0%  | (0.7) | unknown |          | 73        | 110 |     |
| sp P8113      | 192 kDa          | TRUE    | 0%  | (1.0) | unknown |          | 101       | 103 |     |
| sp E6480      | 764 kDa          | TRUE    | 0%  | (0.8) | unknown |          | 85        | 115 |     |
| sp Q64337     | 48 kDa           | TRUE    | 95% | (0.4) | unknown |          | 57        | 160 |     |
| sp P14873     | 270 kDa          | TRUE    | 0%  | (0.7) | unknown |          | 78        | 114 |     |
| sp P26740     | 80 kDa           | TRUE    | 0%  | (0.8) | unknown |          | 85        | 108 |     |
| sp E6452      | 314 kDa          | TRUE    | 0%  | (0.7) | unknown |          | 84        | 124 |     |
| tr B2RUF0     | 38 kDa           | TRUE    | 0%  | (1.0) | unknown |          | 105       | 114 |     |
| sp P07901     | 85 kDa           | TRUE    | 0%  | (0.7) | unknown |          | 128       | 76  |     |
| sp P48774     | 27 kDa           | TRUE    | 0%  | (0.9) | unknown |          | 104       | 110 |     |
| sp E6454      | 314 kDa          | TRUE    | 0%  | (0.8) | unknown |          | 87        | 124 |     |
| sp B2RUF0     | 38 kDa           | TRUE    | 0%  | (1.0) | unknown |          | 105       | 114 |     |
| sp P07901     | 85 kDa           | TRUE    | 0%  | (0.7) | unknown |          | 128       | 76  |     |
| sp P48774     | 27 kDa           | TRUE    | 0%  | (0.9) | unknown |          | 104       | 110 |     |
| sp E6454      | 314 kDa          | TRUE    | 0%  | (0.8) | unknown |          | 87        | 124 |     |
| sp Q91XQ5     | 54 kDa           | TRUE    | 0%  | (0.8) | unknown |          | 90        | 100 |     |
| sp P20929     | 72 kDa           | TRUE    | 0%  | (0.8) | unknown |          | 90        | 100 |     |
| sp E7460      | 163 kDa          | TRUE    | 0%  | (0.7) | unknown |          | 77        | 110 |     |
| sp Q70325     | 22 kDa           | TRUE    | 0%  | (0.9) | unknown |          | 73        | 77  |     |
| sp Q8B075     | 54 kDa           | TRUE    | 0%  | (0.9) | unknown |          | 86        | 97  |     |
| sp Q912W      | 122 kDa          | TRUE    | 0%  | (0.8) | unknown |          | 74        | 91  |     |
| sp Q95916     | 60 kDa           | TRUE    | 0%  | (0.7) | unknown |          | 77        | 101 |     |
| sp Q6K627     | 57 kDa           | TRUE    | 0%  | (0.7) | unknown |          | 78        | 106 |     |
| sp P14733     | 67 kDa           | TRUE    | 0%  | (0.9) | unknown |          | 72        | 83  |     |
| sp Q8B86      | 83 kDa           | TRUE    | 0%  | (1.2) | unknown |          | 100       | 83  |     |
| sp E9P9V1     | 113 kDa          | TRUE    | 0%  | (1.2) | unknown |          | 77        | 79  |     |
| sp P10126     | 50 kDa           | TRUE    | 0%  | (0.8) | unknown |          | 77        | 102 |     |
| sp P40630     | 28 kDa           | TRUE    | 0%  | (1.0) | unknown |          | 72        | 72  |     |
| tr Q3UX26     | 30 kDa           | TRUE    | 0%  | (0.9) | unknown |          | 85        | 97  |     |
| tr Q12115     | 29 kDa           | TRUE    | 0%  | (1.0) | unknown |          | 77        | 101 |     |
| sp Q92Q40     | 40 kDa           | TRUE    | 0%  | (0.9) | unknown |          | 78        | 91  |     |
| sp Q9PDA      | 28 kDa           | TRUE    | 0%  | (0.7) | unknown |          | 62        | 90  |     |
| tr E9P9E7     | 223 kDa          | TRUE    | 0%  | (0.7) | unknown |          | 69        | 91  |     |
| sp Q9S08M     | 58 kDa           | TRUE    | 0%  | (0.7) | unknown |          | 70        | 97  |     |
| sp P16627     | 71 kDa           | TRUE    | 0%  | (0.7) | unknown |          | 74        | 100 |     |
| sp Q61656     | 69 kDa           | TRUE    | 0%  | (1.2) | unknown |          | 91        | 75  |     |
| sp Q81093     | 43 kDa           | TRUE    | 0%  | (0.8) | unknown |          | 66        | 80  |     |
| sp Q01853     | 80 kDa           | TRUE    | 0%  | (1.2) | unknown |          | 76        | 63  |     |
| tr E9QSW5     | 137 kDa          | TRUE    | 0%  | (0.9) | unknown |          | 71        | 79  |     |
| sp Q90847     | 44 kDa           | TRUE    | 0%  | (1.2) | unknown |          | 81        | 67  |     |
| sp P7056      | 1                |         |     |       |         |          |           |     |     |

|     |      |         |                                                                                                                                        |                   |      |     |       |         |    |    |
|-----|------|---------|----------------------------------------------------------------------------------------------------------------------------------------|-------------------|------|-----|-------|---------|----|----|
| 114 | TRUE | Empty   | Protein Tex21 OS=Mus musculus GN=Tex21 PE=1 SV=1                                                                                       | tr Q8R0U9 95 kDa  |      | 0%  | (0.7) | unknown | 47 | 72 |
| 115 | TRUE | Empty   | Lipoma preferred partner homolog OS=Mus musculus GN=Lpp PE=1 SV=1                                                                      | sp Q8B9V 66 kDa   |      | 0%  | (0.7) | unknown | 53 | 74 |
| 116 | TRUE | Empty   | Ribosome-binding protein 1 OS=Mus musculus GN=Rbp1 PE=2 SV=2                                                                           | sp Q8R9P5 173 kDa | TRUE | 0%  | (0.7) | unknown | 48 | 65 |
| 117 | TRUE | Empty   | High mobility group protein B4 OS=Mus musculus GN=HmgB4 PE=2 SV=1                                                                      | sp Q6P8W 22 kDa   |      | 0%  | (0.7) | unknown | 52 | 77 |
| 118 | TRUE | Empty   | Serine/arginine repetitive matrix protein 2 OS=Mus musculus GN=Strm2 PE=1 SV=3                                                         | sp Q8B7E 295 kDa  |      | 0%  | (0.6) | unknown | 46 | 72 |
| 119 | TRUE | Empty   | Heterogeneous nuclear ribonucleoprotein H OS=Mus musculus GN=HnRnpH1 PE=1 SV=3                                                         | sp Q5377 749 kDa  | TRUE | 0%  | (1.0) | unknown | 50 | 38 |
| 120 | TRUE | Empty   | T-complex protein 1 subunit beta OS=Mus musculus GN=Ctcf1 PE=1 SV=4                                                                    | sp P80314 57 kDa  |      | 0%  | (1.2) | unknown | 66 | 57 |
| 121 | TRUE | Empty   | EF-hand domain-containing protein 1 OS=Mus musculus GN=Efhc1 PE=1 SV=1                                                                 | sp Q8Q9T875 3 kDa |      | 0%  | (0.9) | unknown | 51 | 56 |
| 122 | TRUE | Empty   | 40S ribosomal protein S1a OS=Mus musculus GN=Rps1a PE=1 SV=3                                                                           | sp P9735 30 kDa   |      | 0%  | (1.0) | unknown | 52 | 51 |
| 123 | TRUE | Empty   | Myosin phosphatase 3-like interacting protein OS=Mus musculus GN=Mgrip PE=1 SV=2                                                       | sp P97434 115 kDa |      | 0%  | (0.7) | unknown | 41 | 58 |
| 124 | TRUE | Empty   | CAP-G domain-containing linker protein 1 (Fragment) OS=Mus musculus GN=Cldp1 PE=4 SV=1                                                 | sp F73087 136 kDa | TRUE | 0%  | (0.7) | unknown | 48 | 65 |
| 125 | TRUE | Empty   | Heat shock cognate 71 kDa protein OS=Mus musculus GN=Hsc70 PE=1 SV=1                                                                   | sp P63017 71 kDa  | TRUE | 0%  | (0.8) | unknown | 56 | 58 |
| 126 | TRUE | Empty   | T-complex protein 1 subunit gamma OS=Mus musculus GN=Ctcf3 PE=1 SV=1                                                                   | sp P80318 61 kDa  |      | 0%  | (1.1) | unknown | 62 | 56 |
| 127 | TRUE | Empty   | 40S ribosomal protein S18 OS=Mus musculus GN=Rps18 PE=2 SV=4                                                                           | sp P4111 16 kDa   |      | 0%  | (1.0) | unknown | 55 | 56 |
| 128 | TRUE | Empty   | ATP synthase subunit alpha mitochondrial OS=Mus musculus GN=Atp5a1 PE=1 SV=1                                                           | sp Q82365 50 kDa  |      | 0%  | (1.2) | unknown | 62 | 51 |
| 129 | TRUE | Empty   | NADP-dependent malic enzyme OS=Mus musculus GN=Me1 PE=1 SV=2                                                                           | sp P06801 64 kDa  |      | 0%  | (0.9) | unknown | 45 | 50 |
| 130 | TRUE | Empty   | 60S ribosomal protein L13 OS=Mus musculus GN=Rpl13 PE=2 SV=3                                                                           | sp P27659 46 kDa  |      | 0%  | (1.3) | unknown | 61 | 48 |
| 131 | TRUE | Empty   | Heterogeneous nuclear ribonucleoprotein K OS=Mus musculus GN=HnRnpK PE=1 SV=1                                                          | sp P97379 53 kDa  |      | 0%  | (0.8) | unknown | 49 | 65 |
| 132 | TRUE | Empty   | Uncharacterized protein C7orf31 homolog OS=Mus musculus PE=2 SV=1                                                                      | sp Q9Q5Y 68 kDa   |      | 0%  | (0.7) | unknown | 45 | 69 |
| 133 | TRUE | Empty   | Heterogeneous nuclear ribonucleoprotein L (Fragment) OS=Mus musculus GN=HnRnpL PE=4 SV=1                                               | tr G5E924 67 kDa  |      | 0%  | (0.9) | unknown | 58 | 67 |
| 134 | TRUE | Empty   | Pir-mRNA-processing-splicing factor 8 OS=Mus musculus GN=Pf8 PE=1 SV=2                                                                 | sp Q9P99 4274 kDa |      | 0%  | (0.7) | unknown | 41 | 55 |
| 135 | TRUE | Empty   | Actin-like protein 7A OS=Mus musculus GN=Ctca7a PE=1 SV=1                                                                              | sp Q2QV9 49 kDa   |      | 0%  | (0.9) | unknown | 51 | 58 |
| 136 | TRUE | Empty   | Unconventional myosin-Vb OS=Mus musculus GN=Myo5b PE=2 SV=2                                                                            | sp P21271 211 kDa | TRUE | 0%  | (0.7) | unknown | 42 | 59 |
| 137 | TRUE | Empty   | Protein Scml2 OS=Mus musculus GN=Scml2 PE=2 SV=1                                                                                       | tr B1A8V5 100 kDa |      | 0%  | (0.8) | unknown | 45 | 54 |
| 138 | TRUE | Empty   | 60S ribosomal protein L23 OS=Mus musculus GN=Rpl23 PE=1 SV=1                                                                           | sp P28280 15 kDa  |      | 0%  | (1.1) | unknown | 60 | 53 |
| 139 | TRUE | Empty   | Serine beta-lactamase-like protein LACTB, mitochondrial OS=Mus musculus GN=Lactb PE=1 SV=1                                             | sp Q8P89 91 kDa   |      | 0%  | (1.1) | unknown | 44 | 41 |
| 140 | TRUE | Empty   | Interleukin enhancer-binding factor 3 OS=Mus musculus GN=Irf3 PE=1 SV=2                                                                | sp Q921X4 96 kDa  | TRUE | 0%  | (0.8) | unknown | 45 | 57 |
| 141 | TRUE | Empty   | ATP synthase subunit beta, mitochondrial OS=Mus musculus GN=Atp5b PE=1 SV=2                                                            | sp P56480 56 kDa  |      | 0%  | (1.2) | unknown | 62 | 50 |
| 142 | TRUE | Empty   | DNA topoisomerase 2-beta OS=Mus musculus GN=Top2b PE=1 SV=2                                                                            | sp Q64513 182 kDa | TRUE | 0%  | (0.8) | unknown | 40 | 57 |
| 143 | TRUE | Empty   | Protein FAM163A OS=Mus musculus GN=Fam163a PE=1 SV=1                                                                                   | sp Q9046 37 kDa   |      | 0%  | (0.8) | unknown | 42 | 62 |
| 144 | TRUE | Empty   | Spermatid-specific linker histone H1-like protein OS=Mus musculus GN=Hsl1 PE=1 SV=1                                                    | sp Q9YQ1 19 kDa   |      | 0%  | (1.4) | unknown | 67 | 49 |
| 145 | TRUE | Empty   | 60S ribosomal protein L8 OS=Mus musculus GN=Rpl8 PE=2 SV=2                                                                             | sp P29219 28 kDa  |      | 0%  | (0.7) | unknown | 46 | 65 |
| 146 | TRUE | Empty   | Fragile X mental retardation syndrome-related protein 1 OS=Mus musculus GN=Fr1 PE=1 SV=2                                               | sp Q51584 76 kDa  | TRUE | 0%  | (0.6) | unknown | 36 | 64 |
| 147 | TRUE | Empty   | IRNAi-silencing flic3R homolog OS=Mus musculus GN=Flc3r PE=2 SV=1                                                                      | sp Q9P84 55 kDa   |      | 0%  | (0.9) | unknown | 49 | 56 |
| 148 | TRUE | Empty   | Espin OS=Mus musculus GN=Espin PE=2 SV=1                                                                                               | tr B1A8WQ 95 kDa  |      | 0%  | (0.8) | unknown | 46 | 58 |
| 149 | TRUE | Empty   | Protein KIF23 OS=Mus musculus GN=Kif23 PE=2 SV=1                                                                                       | tr Q5G562 109 kDa |      | 0%  | (0.8) | unknown | 47 | 61 |
| 150 | TRUE | Empty   | Spectrin alpha chain, erythrocytic 1 OS=Mus musculus GN=Sptal1 PE=2 SV=3                                                               | sp P80831 280 kDa | TRUE | 0%  | (0.8) | unknown | 37 | 44 |
| 151 | TRUE | Empty   | Heterogeneous nuclear ribonucleoprotein L-like protein 1 OS=Mus musculus GN=HnRnpL1 PE=1 SV=1                                          | sp Q8V8M6 6 kDa   | TRUE | 0%  | (0.6) | unknown | 39 | 61 |
| 152 | TRUE | Empty   | Putative pre-mRNA-splicing factor ATP-dependent RNA helicase DHX15 OS=Mus musculus GN=Dhx15 PE=2 SV=2                                  | sp Q35286 91 kDa  |      | 0%  | (0.9) | unknown | 46 | 51 |
| 153 | TRUE | Empty   | 60S ribosomal protein L7a OS=Mus musculus GN=Rpl7a PE=2 SV=2                                                                           | sp P12970 30 kDa  |      | 0%  | (1.2) | unknown | 53 | 46 |
| 154 | TRUE | Empty   | Glycerolase 2 OS=Mus musculus GN=Gla2 PE=1 SV=1                                                                                        | sp Q9P9A 61 kDa   | TRUE | 0%  | (0.8) | unknown | 47 | 50 |
| 155 | TRUE | Empty   | 40S ribosomal protein S2 OS=Mus musculus GN=Rps2 PE=1 SV=3                                                                             | sp P25444 31 kDa  |      | 0%  | (0.9) | unknown | 47 | 50 |
| 156 | TRUE | Empty   | Spermatogenesis-associated protein 20 OS=Mus musculus GN=Spta20 PE=2 SV=1                                                              | sp Q8Q7Y5 88 kDa  |      | 0%  | (0.7) | unknown | 39 | 59 |
| 157 | TRUE | Empty   | Ankyrin3 OS=Mus musculus GN=Ank3 PE=1 SV=1                                                                                             | sp Q8P719 109 kDa |      | 0%  | (0.7) | unknown | 44 | 65 |
| 158 | TRUE | Empty   | Hemikininase-1 OS=Mus musculus GN=Hk1 PE=1 SV=3                                                                                        | sp P1711 108 kDa  |      | 0%  | (1.2) | unknown | 49 | 42 |
| 159 | TRUE | Empty   | Protein disulfide-isomerase-like protein of the testis OS=Mus musculus GN=Prdlr PE=1 SV=2                                              | sp Q9OAM 68 kDa   |      | 0%  | (1.0) | unknown | 47 | 46 |
| 160 | TRUE | Empty   | Heterogeneous nuclear ribonucleoproteins A2/B1 OS=Mus musculus GN=HnRnpA2B1 PE=1 SV=2                                                  | sp Q8589 67 kDa   |      | 0%  | (0.8) | unknown | 51 | 61 |
| 161 | TRUE | Empty   | Elongation factor 2 OS=Mus musculus GN=Elf2 PE=1 SV=2                                                                                  | sp P58212 95 kDa  |      | 0%  | (1.0) | unknown | 45 | 47 |
| 162 | TRUE | Empty   | 60S ribosomal protein S13 OS=Mus musculus GN=Rps13 PE=1 SV=2                                                                           | sp P8261 17 kDa   |      | 0%  | (1.1) | unknown | 41 | 42 |
| 163 | TRUE | Empty   | Peptidase 3 OS=Mus musculus GN=Dpp3 PE=1 SV=1                                                                                          | sp Q9OAT 54 kDa   | TRUE | 0%  | (0.6) | unknown | 35 | 61 |
| 164 | TRUE | Empty   | Coiled-coil domain-containing protein 67 OS=Mus musculus GN=Coc67 PE=1 SV=3                                                            | sp Q7M6Y 70 kDa   |      | 0%  | (0.9) | unknown | 42 | 49 |
| 165 | TRUE | Empty   | Trifunctional enzyme subunit beta, mitochondrial OS=Mus musculus GN=Hadhb PE=1 SV=1                                                    | sp Q9P9J 51 kDa   | TRUE | 0%  | (1.2) | unknown | 55 | 44 |
| 166 | TRUE | Empty   | Sperm-associated protein OS=Mus musculus GN=Spert PE=1 SV=2                                                                            | sp Q32M6 52 kDa   |      | 0%  | (0.6) | unknown | 39 | 49 |
| 167 | TRUE | Empty   | Fatty acid-binding protein 9 OS=Mus musculus GN=Fabp9 PE=2 SV=2                                                                        | sp Q8R761 65 kDa  |      | 0%  | (0.8) | unknown | 45 | 57 |
| 168 | TRUE | Empty   | 60S acidic ribosomal protein P0 OS=Mus musculus GN=Rpl0 PE=1 SV=3                                                                      | sp P14869 34 kDa  | TRUE | 0%  | (0.9) | unknown | 46 | 51 |
| 169 | TRUE | Empty   | Actin-capping protein subunit alpha-3 OS=Mus musculus GN=Capa3 PE=2 SV=1                                                               | sp P7026 35 kDa   |      | 0%  | (0.7) | unknown | 33 | 46 |
| 170 | TRUE | Empty   | Dynein heavy chain 2, axonemal OS=Mus musculus GN=Dhcx2 PE=2 SV=1                                                                      | sp P6K6E1 52 kDa  |      | 0%  | (0.6) | unknown | 28 | 44 |
| 171 | TRUE | Empty   | Heterogeneous nuclear ribonucleoprotein Q OS=Mus musculus GN=Synrqp PE=1 SV=2                                                          | sp Q7TMK 70 kDa   | TRUE | 0%  | (0.8) | unknown | 54 | 48 |
| 172 | TRUE | Empty   | Heterochromatin protein 1-binding protein 3 OS=Mus musculus GN=Hpb3 PE=1 SV=1                                                          | sp Q3TA8 61 kDa   |      | 0%  | (0.9) | unknown | 45 | 51 |
| 173 | TRUE | Empty   | Functional ATP-dependent lysine-specific prolyl-4-hydroxylase (cyclizing) OS=Mus musculus GN=Dak PE=2 SV=1                             | sp Q8V6C 30 kDa   |      | 0%  | (1.0) | unknown | 47 | 46 |
| 174 | TRUE | Empty   | Kinase-like protein KIF2C OS=Mus musculus GN=Kif2c PE=1 SV=1                                                                           | sp Q92583 81 kDa  |      | 0%  | (0.6) | unknown | 38 | 46 |
| 175 | TRUE | Empty   | F-actin-capping protein subunit beta OS=Mus musculus GN=Capb PE=1 SV=3                                                                 | sp P47757 31 kDa  | TRUE | 0%  | (0.8) | unknown | 43 | 52 |
| 176 | TRUE | Empty   | T-complex protein 1 subunit delta OS=Mus musculus GN=Ctcf4 PE=1 SV=3                                                                   | sp P80315 58 kDa  |      | 0%  | (1.1) | unknown | 46 | 43 |
| 177 | TRUE | Empty   | 177 domain-containing family member C3 OS=Mus musculus GN=Ctcf3 PE=2 SV=2                                                              | sp Q9O48 48 kDa   |      | 0%  | (0.5) | unknown | 25 | 60 |
| 178 | TRUE | Empty   | ATP synthase subunit O, mitochondrial OS=Mus musculus GN=Atp5o PE=1 SV=1                                                               | sp Q9O8R2 23 kDa  |      | 0%  | (0.9) | unknown | 49 | 53 |
| 179 | TRUE | Empty   | Ropinorin-1 OS=Mus musculus GN=Ropin1 PE=1 SV=1                                                                                        | sp Q9G522 4 kDa   |      | 0%  | (0.7) | unknown | 43 | 60 |
| 180 | TRUE | Empty   | MCG1697, isoform CRA_A OS=Mus musculus GN=Fa154a PE=4 SV=1                                                                             | tr B1A8P7 55 kDa  |      | 0%  | (0.7) | unknown | 36 | 55 |
| 181 | TRUE | Empty   | 60S ribosomal protein L18a OS=Mus musculus GN=Rpl18a PE=1 SV=1                                                                         | sp P8271 71 kDa   |      | 0%  | (1.1) | unknown | 47 | 46 |
| 182 | TRUE | Empty   | Dihydroxyphenylpyruvate acetyltransferase component of pyruvate dehydrogenase complex, mitochondrial OS=Mus musculus GN=Dhaf PE=1 SV=2 | sp Q8B8M 68 kDa   |      | 0%  | (1.5) | unknown | 54 | 37 |
| 183 | TRUE | Empty   | Fibronectin type III domain-containing protein 8 OS=Mus musculus GN=Fndc8 PE=2 SV=1                                                    | sp Q9O2H 36 kDa   |      | 0%  | (0.8) | unknown | 45 | 54 |
| 184 | TRUE | Empty   | 40S ribosomal protein S7 OS=Mus musculus GN=Rps7 PE=2 SV=1                                                                             | sp P2626 22 kDa   |      | 0%  | (0.7) | unknown | 43 | 59 |
| 185 | TRUE | Empty   | Nuclear RNA helicase 2 OS=Mus musculus GN=Ctca2 PE=1 SV=3                                                                              | sp Q9O2H 36 kDa   |      | 0%  | (0.8) | unknown | 39 | 42 |
| 186 | TRUE | Empty   | Calreticulin OS=Mus musculus GN=Calr PE=1 SV=1                                                                                         | sp P14211 48 kDa  |      | 0%  | (1.2) | unknown | 44 | 36 |
| 187 | TRUE | Empty   | Heterogeneous nuclear ribonucleoproteins C1/C2 OS=Mus musculus GN=HnRnpC1 PE=1 SV=1                                                    | sp Q9O2H 36 kDa   |      | 0%  | (1.2) | unknown | 47 | 40 |
| 188 | TRUE | Empty   | 116 kDa US small nuclear ribonucleoprotein component OS=Mus musculus GN=Utp22 PE=2 SV=1                                                | sp Q8B81 109 kDa  |      | 0%  | (0.5) | unknown | 28 | 55 |
| 189 | TRUE | Empty   | Coiled-coil domain-containing protein 136 OS=Mus musculus GN=Ctcf3 PE=2 SV=2                                                           | sp Q9O48 48 kDa   |      | 0%  | (0.7) | unknown | 41 | 47 |
| 190 | TRUE | Empty   | Unconventional myosin-X OS=Mus musculus GN=Myo1c PE=1 SV=1                                                                             | sp Q9W71 122 kDa  |      | 0%  | (0.8) | unknown | 40 | 49 |
| 191 | TRUE | Empty   | Alpha-enolase OS=Mus musculus GN=Eno1 PE=1 SV=3                                                                                        | sp P17182 47 kDa  |      | 0%  | (0.7) | unknown | 39 | 53 |
| 192 | TRUE | Empty   | Tektin-1 OS=Mus musculus GN=Tekt1 PE=2 SV=1                                                                                            | sp Q9O4Z 49 kDa   |      | 0%  | (0.7) | unknown | 39 | 57 |
| 193 | TRUE | Empty   | L1-related protein 7 OS=Mus musculus GN=Lrnp7 PE=1 SV=2                                                                                | sp Q9O5A 86 kDa   |      | 0%  | (1.1) | unknown | 47 | 46 |
| 194 | TRUE | Empty   | Nuclear protein 58 OS=Mus musculus GN=Nup58 PE=1 SV=1                                                                                  | sp Q9O6F 60 kDa   |      | 0%  | (0.6) | unknown | 39 | 62 |
| 195 | TRUE | Empty   | Heterogeneous nuclear ribonucleoprotein A3 OS=Mus musculus GN=HnRnpA3 PE=1 SV=1                                                        | sp Q8B80 40 kDa   |      | 0%  | (1.2) | unknown | 52 | 43 |
| 196 | TRUE | Empty   | Nuclear pore membrane glycoprotein 216-like OS=Mus musculus GN=Nup216 PE=2 SV=2                                                        | sp Q9O2T 209 kDa  |      | 0%  | (0.9) | unknown | 38 | 41 |
| 197 | TRUE | Empty   | L-lactate dehydrogenase OS=Mus musculus GN=Ldh PE=1 SV=1                                                                               | sp G5E8M 40 kDa   | TRUE | 0%  | (0.9) | unknown | 43 | 48 |
| 198 | TRUE | Empty   | Heterogeneous nuclear ribonucleoprotein R OS=Mus musculus GN=HnRnpR PE=2 SV=1                                                          | tr Q8VHM 71 kDa   | TRUE | 0%  | (0.9) | unknown | 35 | 55 |
| 199 | TRUE | Empty   | Putative ATP-dependent RNA helicase P112 OS=Mus musculus GN=Hdpp1 PE=1 SV=1                                                            | sp P16381 73 kDa  | TRUE | 0%  | (1.1) | unknown | 42 | 41 |
| 200 | TRUE | Empty   | Ker-2 complex subunit beta OS=Mus musculus GN=Kp2b PE=1 SV=1                                                                           | sp Q5O8C 105 kDa  | TRUE | 0%  | (0.9) | unknown | 35 | 38 |
| 201 | TRUE | Empty   | Zona pellucida 1 receptor OS=Mus musculus GN=Czpr1 PE=1 SV=1                                                                           | tr G9797 65 kDa   |      | 0%  | (1.0) | unknown | 38 | 39 |
| 202 | TRUE | Empty   | rRNA 2'-O-methyltransferase fibrillarin OS=Mus musculus GN=Fab1 PE=1 SV=2                                                              | sp P35550 34 kDa  |      | 0%  | (0.6) | unknown | 32 | 52 |
| 203 | TRUE | Empty   | 60S ribosomal protein L17 OS=Mus musculus GN=Rpl17 PE=1 SV=3                                                                           | sp P47962 34 kDa  |      | 0%  | (1.0) | unknown | 39 | 40 |
| 204 | TRUE | Empty   | 60S ribosomal protein L13 OS=Mus musculus GN=Rpl13 PE=2 SV=3                                                                           | sp Q9O2H 36 kDa   |      | 0%  | (1.2) | unknown | 47 | 46 |
| 205 | TRUE | Empty   | Calcium-binding tyrosine phosphorylation-regulated protein OS=Mus musculus GN=Cabyr PE=1 SV=1                                          | sp Q9O4Z 49 kDa   |      | 0%  | (0.6) | unknown | 31 | 52 |
| 206 | TRUE | Empty   | Actin, alpha cardiac muscle 1 OS=Mus musculus GN=Actc1 PE=1 SV=1                                                                       | sp P68033 42 kDa  | TRUE | 0%  | (0.9) | unknown | 37 | 49 |
| 207 | TRUE | Empty   | US small nuclear ribonucleoprotein 200 kDa helicase OS=Mus musculus GN=Snrp200 PE=2 SV=1                                               | sp Q6P47 245 kDa  |      | 0%  | (0.8) | unknown | 33 | 42 |
| 208 | TRUE | Empty   | EAV protein 1 OS=Mus musculus GN=Eav1 PE=1 SV=2                                                                                        | sp P7037 36 kDa   |      | 0%  | (1.1) | unknown | 39 | 46 |
| 209 | TRUE | Empty   | Lamina-associated polypeptide 2, isoforms alpha/zeta OS=Mus musculus GN=Lap2 PE=1 SV=1                                                 | sp Q5O13 375 kDa  | TRUE | 0%  | (0.5) | unknown | 29 | 53 |
| 210 | TRUE | Empty   | T-complex protein 1 subunit epsilon OS=Mus musculus GN=Ctcf5 PE=1 SV=1                                                                 | sp P80316 60 kDa  |      | 0%  | (0.8) | unknown | 35 | 45 |
| 211 | TRUE | Empty   | Testis-specific H1 histone OS=Mus musculus GN=H1m PE=2 SV=2                                                                            | sp Q8JCH 44 kDa   |      | 0%  | (1.1) | unknown | 37 | 33 |
| 212 | TRUE | Empty   | MCG1403 OS=Mus musculus GN=Ctcf1 PE=1 SV=1                                                                                             | tr D1376 61 kDa   |      | 0%  | (1.0) | unknown | 43 | 46 |
| 213 | TRUE | Empty   | Ribosomal protein OS=Mus musculus GN=Rpl0a PE=2 SV=1                                                                                   | tr Q5K5F 25 kDa   |      | 0%  | (1.1) | unknown | 44 | 40 |
| 214 | TRUE | Empty   | Histone H3.3 OS=Mus musculus GN=H3f3a PE=1 SV=2                                                                                        | sp P84244 15 kDa  | TRUE | 0%  | (0.7) | unknown | 2  | 53 |
| 215 | TRUE | Empty   | Kinase-like protein KIF3A OS=Mus musculus GN=Kif3a PE=1 SV=1                                                                           | sp Q6T71 85 kDa   |      | 95% | (0.4) | unknown | 21 | 47 |
| 216 | TRUE | Empty   | Actin-modulated factor 3-binding protein 1 OS=Mus musculus GN=Pmltp1 PE=2 SV=1                                                         | sp Q9O4W 119 kDa  |      | 0%  | (1.1) | unknown | 37 | 37 |
| 217 | TRUE | Empty   | 40S ribosomal protein S6 OS=Mus musculus GN=Rps6 PE=1 SV=1                                                                             | sp P27374 29 kDa  |      | 0%  | (1.1) | unknown | 45 | 40 |
| 218 | TRUE | Empty   | Heterogeneous nuclear ribonucleoprotein L1-like protein 2 OS=Mus musculus GN=HnRnpL2 PE=1 SV=2                                         | sp Q9O9P 85 kDa   |      | 0%  | (0.8) | unknown | 36 | 45 |
| 219 | TRUE | Empty   | Tripartite protein OS=Mus musculus GN=Spf1 PE=2 SV=1                                                                                   | sp Q9O9P 88 kDa   |      | 0%  | (0.9) | unknown | 38 | 40 |
| 220 | TRUE | Empty   | Fructose-bisphosphate aldolase OS=Mus musculus GN=Aldoa PE=2 SV=1                                                                      | tr A42241 45 kDa  | TRUE | 0%  | (0.8) | unknown | 35 | 46 |
| 221 | TRUE | Empty   | Putative oxidoreductase GLYR1 OS=Mus musculus GN=Glyr1 PE=4 SV=1                                                                       | tr D3Y1T1 63 kDa  |      | 0%  | (0.7) | unknown | 33 | 46 |
| 222 | TRUE | Empty   | Glucose 6-phosphate isomerase OS=Mus musculus GN=Gpi PE=1 SV=1                                                                         | sp P07375 61 kDa  |      | 0%  | (0.8) | unknown | 35 | 47 |
| 223 | TRUE | Empty   | Pyruvate dehydrogenase E1 component subunit alpha, testis-specific form, mitochondrial OS=Mus musculus GN=Pdh2 PE=2 SV=1               | sp P55481 43 kDa  |      | 0%  | (1.3) | unknown | 47 | 35 |
| 224 | TRUE | Empty   | 60S ribosomal protein L13 OS=Mus musculus GN=Rpl13 PE=2 SV=3                                                                           | sp P47962 34 kDa  |      | 0%  | (0.9) | unknown | 30 | 33 |
| 225 | TRUE | Empty</ |                                                                                                                                        |                   |      |     |       |         |    |    |

|     |      |       |                                                                                                        |                  |      |     |       |         |    |    |
|-----|------|-------|--------------------------------------------------------------------------------------------------------|------------------|------|-----|-------|---------|----|----|
| 267 | TRUE | Empty | Sperm surface protein Sp17 OS=Mus musculus GN=Sp17 PE=2 SV=1                                           | sp Q625217 kDa   |      | 0%  | (0.6) | unknown | 30 | 48 |
| 268 | TRUE | Empty | Saccharopine dehydrogenase-like oxidoreductase OS=Mus musculus GN=Scdph2 PE=2 SV=2                     | sp Q8R12747 kDa  |      | 0%  | (1.0) | unknown | 34 | 35 |
| 269 | TRUE | Empty | Dystonin OS=Mus musculus GN=PE-4 SV=1                                                                  | sp F44R195 kDa   | TRUE | 0%  | (0.8) | unknown | 22 | 29 |
| 270 | TRUE | Empty | Nuclear pore complex protein Nup98-Nup96 OS=Mus musculus GN=Nup98 PE=1 SV=1                            | sp Q6P695 kDa    |      | 95% | (0.4) | unknown | 18 | 46 |
| 271 | TRUE | Empty | Aspartate-tRNA ligase, cytoplasmic OS=Mus musculus GN=Dara PE=2 SV=2                                   | sp Q228257 kDa   |      | 0%  | (1.3) | unknown | 28 | 21 |
| 272 | TRUE | Empty | Adenylyl kinase isoenzyme 1 OS=Mus musculus GN=A1 PE=1 SV=1                                            | sp Q2697522 kDa  |      | 0%  | (0.7) | unknown | 33 | 48 |
| 273 | TRUE | Empty | Glycerol kinase-like 1 OS=Mus musculus GN=Ckyl1 PE=2 SV=1                                              | sp Q6C3516 kDa   | TRUE | 0%  | (0.8) | unknown | 33 | 42 |
| 274 | TRUE | Empty | Cell growth-regulating nuclear protein OS=Mus musculus GN=Lyar PE=1 SV=2                               | sp Q028844 kDa   |      | 0%  | (1.0) | unknown | 29 | 30 |
| 275 | TRUE | Empty | Phenylalanyl-tRNA ligase alpha subunit OS=Mus musculus GN=FaFara PE=2 SV=1                             | sp Q8DC0758 kDa  |      | 0%  | (1.2) | unknown | 36 | 31 |
| 276 | TRUE | Empty | Glutathione S-transferase omega-2 OS=Mus musculus GN=GtO2a PE=2 SV=1                                   | sp Q8K2925 kDa   |      | 0%  | (0.8) | unknown | 23 | 28 |
| 277 | TRUE | Empty | Bromodomain-containing protein 3 (Fragment) OS=Mus musculus GN=Brd3 PE=4 SV=1                          | sp A2AKA9 kDa    | TRUE | 0%  | (0.8) | unknown | 35 | 38 |
| 278 | TRUE | Empty | Protein DnaH10 OS=Mus musculus GN=DnaH10 PE=4 SV=2                                                     | tr D1Y0X kDa     |      | 0%  | (0.6) | unknown | 15 | 25 |
| 279 | TRUE | Empty | Histone H3.2 OS=Mus musculus GN=H3t13b PE=1 SV=2                                                       | sp P84228 kDa    | TRUE | 0%  | (0.9) | unknown | 40 | 6  |
| 280 | TRUE | Empty | Ferret-associated domain-containing protein 1 OS=Mus musculus GN=FrAd1 PE=2 SV=1                       | sp A2P9H0 kDa    |      | 0%  | (0.8) | unknown | 36 | 31 |
| 281 | TRUE | Empty | Stress-70 protein, mitochondrial OS=Mus musculus GN=Hsp9a PE=1 SV=3                                    | sp P38647 kDa    | TRUE | 0%  | (1.0) | unknown | 31 | 32 |
| 282 | TRUE | Empty | Synaptosomal complex protein 2 OS=Mus musculus GN=Syn2c PE=1 SV=2                                      | sp Q8CUCU kDa    |      | 0%  | (0.8) | unknown | 27 | 34 |
| 283 | TRUE | Empty | Regulator of nonsense transcripts 1 OS=Mus musculus GN=Irfpl1 PE=1 SV=2                                | sp Q8P6UC kDa    |      | 0%  | (1.5) | unknown | 35 | 24 |
| 284 | TRUE | Empty | 6-phosphoglucoconase type C OS=Mus musculus GN=6Pg PE=1 SV=1                                           | sp Q2W0A95 kDa   | TRUE | 0%  | (1.0) | unknown | 35 | 35 |
| 285 | TRUE | Empty | Triosephosphate isomerase OS=Mus musculus GN=Tpi1 PE=1 SV=4                                            | sp P1751 kDa     |      | 0%  | (0.7) | unknown | 29 | 39 |
| 286 | TRUE | Empty | ADP/ATP translocase 2 OS=Mus musculus GN=SLC25a5 PE=1 SV=3                                             | sp P51881 kDa    | TRUE | 0%  | (1.3) | unknown | 39 | 30 |
| 287 | TRUE | Empty | Calmodulin OS=Mus musculus GN=Calml1 PE=1 SV=2                                                         | sp P22204 kDa    |      | 95% | (0.4) | unknown | 21 | 47 |
| 288 | TRUE | Empty | Ferret-associated domain-containing protein 22 OS=Mus musculus GN=Ppplr32 PE=2 SV=1                    | sp Q2L484 kDa    |      | 0%  | (0.8) | unknown | 29 | 38 |
| 289 | TRUE | Empty | Spectrin beta chain, non-erythrocytic 1 OS=Mus musculus GN=Spb1n1 PE=1 SV=1                            | sp Q26261274 kDa | TRUE | 0%  | (0.8) | unknown | 25 | 33 |
| 290 | TRUE | Empty | Nuclear receptor coactivator 5 OS=Mus musculus GN=Ncoa5 PE=1 SV=1                                      | sp Q91W13 kDa    |      | 0%  | (0.5) | unknown | 19 | 35 |
| 291 | TRUE | Empty | ATPase family AAA domain-containing protein 3 OS=Mus musculus GN=Atad3 PE=1 SV=1                       | sp Q25261 kDa    |      | 0%  | (0.6) | unknown | 25 | 40 |
| 292 | TRUE | Empty | 60S ribosomal protein L14 OS=Mus musculus GN=Rpl14 PE=2 SV=3                                           | sp Q26C92724 kDa |      | 0%  | (1.0) | unknown | 37 | 36 |
| 293 | TRUE | Empty | WD repeat-containing protein 65 OS=Mus musculus GN=Wdr65 PE=2 SV=3                                     | sp Q01R145 kDa   |      | 0%  | (0.7) | unknown | 21 | 32 |
| 294 | TRUE | Empty | Histone H11 OS=Mus musculus GN=H1t11 PE=1 SV=4                                                         | sp Q0171322 kDa  | TRUE | 0%  | (0.9) | unknown | 35 | 34 |
| 295 | TRUE | Empty | Tropomodulin-3 OS=Mus musculus GN=Tmod3 PE=1 SV=1                                                      | sp Q2JH0 kDa     | TRUE | 0%  | (0.7) | unknown | 27 | 37 |
| 296 | TRUE | Empty | Formin-independent RhoA-dependent protein kinase activator A OS=Mus musculus GN=PkrA PE=1 SV=1         | sp Q2W9734 kDa   |      | 0%  | (0.9) | unknown | 27 | 37 |
| 297 | TRUE | Empty | Myosin light chain 4 (Fragment) OS=Mus musculus GN=MyL4 PE=2 SV=1                                      | tr A2AG68 kDa    |      | 0%  | (0.7) | unknown | 29 | 43 |
| 298 | TRUE | Empty | Transducer and activator of transcription 4 OS=Mus musculus GN=Stat4 PE=2 SV=1                         | tr Q2V157 kDa    |      | 0%  | (0.6) | unknown | 24 | 42 |
| 299 | TRUE | Empty | Shock protein HSP 90 beta OS=Mus musculus GN=Hsp90b1 PE=1 SV=3                                         | sp P14893 kDa    | TRUE | 0%  | (1.8) | unknown | 44 | 19 |
| 300 | TRUE | Empty | Peptidyl-prolyl isomerase A OS=Mus musculus GN=PpaA PE=1 SV=2                                          | sp P17742 kDa    | TRUE | 0%  | (1.3) | unknown | 37 | 29 |
| 301 | TRUE | Empty | Junctonal protein associated with coronary artery disease OS=Mus musculus GN=Jca1 PE=1 SV=2            | sp Q5DTX6 kDa    |      | 95% | (0.4) | unknown | 17 | 42 |
| 302 | TRUE | Empty | Chromodomain-helicase-DNA-binding protein 4 OS=Mus musculus GN=Chd4 PE=1 SV=1                          | sp Q6PDC218 kDa  | TRUE | 0%  | (0.8) | unknown | 24 | 30 |
| 303 | TRUE | Empty | Serine/arginine-rich splicing factor 9 OS=Mus musculus GN=Spr9 PE=1 SV=1                               | sp Q5D006 kDa    |      | 0%  | (1.0) | unknown | 30 | 30 |
| 304 | TRUE | Empty | 60S ribosomal protein L7 OS=Mus musculus GN=Rpl7 PE=2 SV=2                                             | sp P14418 kDa    |      | 0%  | (1.0) | unknown | 30 | 31 |
| 305 | TRUE | Empty | 60S ribosomal protein L18 OS=Mus musculus GN=Rpl18 PE=2 SV=3                                           | sp P35880 kDa    |      | 0%  | (1.2) | unknown | 32 | 27 |
| 306 | TRUE | Empty | Transcription intermediary factor 1 beta OS=Mus musculus GN=Trim28 PE=1 SV=3                           | sp Q263189 kDa   |      | 0%  | (1.9) | unknown | 37 | 19 |
| 307 | TRUE | Empty | Histone H1.2 OS=Mus musculus GN=H1t12 PE=1 SV=2                                                        | sp P15864 kDa    | TRUE | 0%  | (1.0) | unknown | 11 | 52 |
| 308 | TRUE | Empty | 14-3-3 protein epsilon OS=Mus musculus GN=Ywhae PE=1 SV=1                                              | sp P22529 kDa    | TRUE | 0%  | (1.4) | unknown | 31 | 31 |
| 309 | TRUE | Empty | Serine/threonine-protein phosphatase PP1-gamma catalytic subunit OS=Mus musculus GN=Ppp1cc PE=1 SV=1   | sp P30807 kDa    | TRUE | 0%  | (1.2) | unknown | 33 | 27 |
| 310 | TRUE | Empty | Keratin, type I cytoskeletal 42 OS=Mus musculus GN=Krt42 PE=1 SV=1                                     | sp Q6PFX2 kDa    | TRUE | 0%  | (1.7) | unknown | 24 | 14 |
| 311 | TRUE | Empty | Splicing factor 3A subunit 1 OS=Mus musculus GN=SF3A1 PE=1 SV=2                                        | sp Q8K4589 kDa   |      | 0%  | (0.8) | unknown | 21 | 26 |
| 312 | TRUE | Empty | Protein Spata31 OS=Mus musculus GN=Spata31 PE=4 SV=1                                                   | tr E9Q5T5 kDa    | TRUE | 0%  | (0.7) | unknown | 23 | 31 |
| 313 | TRUE | Empty | Histone H1.4 OS=Mus musculus GN=H1t14 PE=1 SV=2                                                        | sp Q43274 kDa    | TRUE | 0%  | (1.0) | unknown | 59 | 9  |
| 314 | TRUE | Empty | 40S ribosomal protein S18 OS=Mus musculus GN=Rps18 PE=1 SV=3                                           | sp P22278 kDa    |      | 0%  | (1.1) | unknown | 31 | 28 |
| 315 | TRUE | Empty | 38S ribosomal protein S23 OS=Mus musculus GN=Rps23 PE=2 SV=1                                           | sp Q22818 kDa    |      | 0%  | (1.0) | unknown | 38 | 28 |
| 316 | TRUE | Empty | Splicing factor 3B subunit 1 OS=Mus musculus GN=SF3B1 PE=1 SV=1                                        | sp Q9N986 kDa    |      | 0%  | (0.5) | unknown | 19 | 35 |
| 317 | TRUE | Empty | Myeloid leukemia factor 1 OS=Mus musculus GN=MLF1 PE=1 SV=1                                            | sp Q2QWV0 kDa    |      | 95% | (1.0) | unknown | 48 | 16 |
| 318 | TRUE | Empty | Succinyl-CoA ligase [ADP/GDP-forming] subunit alpha, mitochondrial OS=Mus musculus GN=Sucfl1 PE=1 SV=4 | sp Q2WUW3 kDa    |      | 0%  | (1.0) | unknown | 36 | 35 |
| 319 | TRUE | Empty | Armadillo repeat-containing 4 OS=Mus musculus GN=Arma4 PE=2 SV=1                                       | tr B29V5 kDa     |      | 0%  | (0.9) | unknown | 21 | 26 |
| 320 | TRUE | Empty | Histone H2AX OS=Mus musculus GN=H2ax PE=1 SV=2                                                         | sp P27661 kDa    | TRUE | 0%  | (0.8) | unknown | 31 | 43 |
| 321 | TRUE | Empty | Histone H1.1 OS=Mus musculus GN=H1t11 PE=1 SV=2                                                        | sp H14327 kDa    |      | 0%  | (1.0) | unknown | 34 | 37 |
| 322 | TRUE | Empty | TAR DNA-binding protein 41 OS=Mus musculus GN=Tarbp4 PE=1 SV=1                                         | sp Q5221725 kDa  |      | 0%  | (0.8) | unknown | 30 | 35 |
| 323 | TRUE | Empty | Cysteine-tRNA ligase, cytoplasmic OS=Mus musculus GN=Cars PE=1 SV=2                                    | sp Q5E87295 kDa  |      | 0%  | (0.7) | unknown | 21 | 31 |
| 324 | TRUE | Empty | Tropomodulin-2 OS=Mus musculus GN=Tmod2 PE=1 SV=2                                                      | sp Q9JXK7 kDa    | TRUE | 0%  | (0.9) | unknown | 26 | 30 |
| 325 | TRUE | Empty | Protein Nck1 OS=Mus musculus GN=Nck1 PE=2 SV=1                                                         | tr E9Q5C9 kDa    |      | 0%  | (0.7) | unknown | 25 | 35 |
| 326 | TRUE | Empty | Histone H1 OS=Mus musculus GN=H1t1 PE=1 SV=1                                                           | sp P01212 kDa    |      | 0%  | (0.6) | unknown | 21 | 26 |
| 327 | TRUE | Empty | Adenylyl kinase 8 OS=Mus musculus GN=Aak8 PE=2 SV=1                                                    | sp Q232M055 kDa  |      | 0%  | (0.7) | unknown | 24 | 33 |
| 328 | TRUE | Empty | DnaJ homolog subfamily B member 13 OS=Mus musculus GN=Dnajb13 PE=2 SV=1                                | sp Q807536 kDa   |      | 0%  | (0.8) | unknown | 24 | 32 |
| 329 | TRUE | Empty | AP-3 complex subunit beta-1 OS=Mus musculus GN=Ap3b1 PE=1 SV=2                                         | sp Q2211123 kDa  |      | 0%  | (1.4) | unknown | 28 | 20 |
| 330 | TRUE | Empty | Spectrin alpha chain, non-erythrocytic 1 OS=Mus musculus GN=Spftn1 PE=1 SV=1                           | sp E9Q444 kDa    | TRUE | 0%  | (0.8) | unknown | 28 | 20 |
| 331 | TRUE | Empty | 85kDa I2A calcium-independent phospholipase A2 OS=Mus musculus GN=Pla2g6 PE=1 SV=3                     | sp P27819 kDa    |      | 0%  | (0.7) | unknown | 22 | 31 |
| 332 | TRUE | Empty | Nuclear pore complex protein Nup93 OS=Mus musculus GN=Nup93 PE=2 SV=1                                  | sp Q8B7193 kDa   | TRUE | 95% | (0.5) | unknown | 16 | 32 |
| 333 | TRUE | Empty | Nuclear RNA export factor 1 OS=Mus musculus GN=Nrpe1 PE=1 SV=3                                         | sp Q299X7 kDa    |      | 0%  | (0.7) | unknown | 22 | 33 |
| 334 | TRUE | Empty | YFP508 protein Claf0166 homolog OS=Mus musculus GN=YFP508 PE=2 SV=1                                    | sp Q2Q2128 kDa   |      | 0%  | (1.0) | unknown | 11 | 52 |
| 335 | TRUE | Empty | T-complex protein 1 subunit zeta OS=Mus musculus GN=Ctcfz PE=1 SV=3                                    | sp P301317 kDa   | TRUE | 0%  | (0.8) | unknown | 26 | 33 |
| 336 | TRUE | Empty | Probable ATP-dependent RNA helicase DDX4 OS=Mus musculus GN=DDX4 PE=1 SV=2                             | sp Q6149676 kDa  | TRUE | 0%  | (1.1) | unknown | 29 | 26 |
| 337 | TRUE | Empty | Dynein intermediate chain 1, axonemal OS=Mus musculus GN=Dnac1 PE=2 SV=1                               | sp Q8C0M kDa     |      | 0%  | (0.7) | unknown | 22 | 30 |
| 338 | TRUE | Empty | Asenin-tRNA ligase, cytoplasmic OS=Mus musculus GN=Asen1 PE=2 SV=2                                     | sp Q29W076 kDa   |      | 0%  | (0.9) | unknown | 27 | 40 |
| 339 | TRUE | Empty | DEAD (Asp-Glu-Ala-Gly) box polypeptide 17, isoform CRA_b OS=Mus musculus GN=DDx17 PE=2 SV=1            | tr Q1U74713 kDa  | TRUE | 0%  | (1.2) | unknown | 28 | 23 |
| 340 | TRUE | Empty | Spectrin beta 1 OS=Mus musculus GN=Spb1 PE=2 SV=1                                                      | tr Q1UGU2268 kDa | TRUE | 0%  | (0.8) | unknown | 21 | 24 |
| 341 | TRUE | Empty | Diazepam-binding inhibitor-like 4 OS=Mus musculus GN=Dbil5 PE=2 SV=1                                   | sp Q29G510 kDa   |      | 0%  | (0.6) | unknown | 23 | 39 |
| 342 | TRUE | Empty | Proteasome-1 OS=Mus musculus GN=Pr1 PE=1 SV=1                                                          | sp P37070 kDa    | TRUE | 0%  | (1.4) | unknown | 39 | 27 |
| 343 | TRUE | Empty | 14-3-3 protein zeta/delta OS=Mus musculus GN=Ywhaz PE=1 SV=1                                           | sp P31011 kDa    |      | 0%  | (1.0) | unknown | 29 | 27 |
| 344 | TRUE | Empty | Cytoskeleton-associated protein 4 OS=Mus musculus GN=Cdnp4 PE=2 SV=2                                   | sp Q8B8M64 kDa   |      | 0%  | (1.2) | unknown | 33 | 28 |
| 345 | TRUE | Empty | EF-hand domain-containing family member B OS=Mus musculus GN=EFhb PE=2 SV=2                            | sp Q2QWU96 kDa   |      | 0%  | (0.6) | unknown | 21 | 33 |
| 346 | TRUE | Empty | Armadillo repeat sequence 151 protein OS=Mus musculus GN=Arml151 PE=1 SV=1                             | sp Q29M917 kDa   |      | 0%  | (0.6) | unknown | 21 | 20 |
| 347 | TRUE | Empty | Protein FAM205A OS=Mus musculus GN=Fam205a PE=1 SV=1                                                   | sp A2APU2146 kDa | TRUE | 95% | (0.5) | unknown | 17 | 35 |
| 348 | TRUE | Empty | Acrasin OS=Mus musculus GN=Acr PE=2 SV=1                                                               | sp P23578 kDa    |      | 0%  | (1.2) | unknown | 32 | 27 |
| 349 | TRUE | Empty | FACT complex subunit SFRP1 OS=Mus musculus GN=Sfrp1 PE=1 SV=2                                          | sp Q26894383 kDa |      | 0%  | (0.8) | unknown | 27 | 33 |
| 350 | TRUE | Empty | Myosin regulatory light chain 12B OS=Mus musculus GN=Myr12b PE=1 SV=2                                  | sp Q2TH2220 kDa  | TRUE | 0%  | (0.8) | unknown | 26 | 34 |
| 351 | TRUE | Empty | 40S ribosomal protein S9 OS=Mus musculus GN=Rps9 PE=2 SV=3                                             | sp Q6ZWN23 kDa   |      | 0%  | (1.0) | unknown | 25 | 24 |
| 352 | TRUE | Empty | Serine/arginine-rich splicing factor 7 OS=Mus musculus GN=Spr7 PE=1 SV=1                               | sp Q8B8Y731 kDa  |      | 0%  | (1.0) | unknown | 26 | 25 |
| 353 | TRUE | Empty | Pre-mRNA processing factor 19 OS=Mus musculus GN=Prp19 PE=2 SV=1                                       | sp Q29R9V55 kDa  |      | 0%  | (1.0) | unknown | 31 | 30 |
| 354 | TRUE | Empty | Eukaryotic translation initiation factor 2 subunit 3, V1-linked OS=Mus musculus GN=Eif2b3 PE=2 SV=2    | sp Q2Z0W251 kDa  |      | 0%  | (1.1) | unknown | 32 | 30 |
| 355 | TRUE | Empty | 60S ribosomal protein L9 OS=Mus musculus GN=Rpl9 PE=2 SV=2                                             | sp P51410 kDa    |      | 0%  | (0.8) | unknown | 26 | 33 |
| 356 | TRUE | Empty | 26S protease regulatory subunit 8 OS=Mus musculus GN=Prnc5 PE=1 SV=1                                   | sp P21286 kDa    |      | 0%  | (1.5) | unknown | 35 | 24 |
| 357 | TRUE | Empty | Histone subunit beta-1 OS=Mus musculus GN=H2b1 PE=1 SV=2                                               | sp P705897 kDa   |      | 0%  | (0.9) | unknown | 35 | 22 |
| 358 | TRUE | Empty | Spermatogenesis-associated protein 5 OS=Mus musculus GN=Spata5 PE=2 SV=2                               | sp Q3JUMC97 kDa  |      | 0%  | (1.5) | unknown | 36 | 23 |
| 359 | TRUE | Empty | ATP synthase subunit gamma, mitochondrial OS=Mus musculus GN=Atp5c1 PE=1 SV=1                          | sp Q11VR233 kDa  | TRUE | 0%  | (1.2) | unknown | 31 | 26 |
| 360 | TRUE | Empty | Rac GTPase-activating protein 1 OS=Mus musculus GN=Racgapi PE=2 SV=1                                   | sp Q29WV70 kDa   |      | 0%  | (0.7) | unknown | 18 | 26 |
| 361 | TRUE | Empty | Spectrin-associated Rab21 interactor-like 4 OS=Mus musculus GN=Sanl1 PE=2 SV=1                         | sp P165465 kDa   |      | 0%  | (0.8) | unknown | 27 | 27 |
| 362 | TRUE | Empty | Spectrin alpha chain, non-erythrocytic 1 OS=Mus musculus GN=Spftn1 PE=1 SV=4                           | sp P16546 kDa    | TRUE | 95% | (0.8) | unknown | 44 | 0  |
| 363 | TRUE | Empty | T-complex protein 1 subunit eta OS=Mus musculus GN=Ct17 PE=1 SV=1                                      | sp P30133 kDa    | TRUE | 0%  | (0.7) | unknown | 18 | 25 |
| 364 | TRUE | Empty | CDK5 regulatory subunit-associated protein 2 OS=Mus musculus GN=Cdk5rap2 PE=1 SV=3                     | sp Q8R38920 kDa  |      | 0%  | (1.0) | unknown | 21 | 22 |
| 365 | TRUE | Empty | Avenin OS=Mus musculus GN=Avn1 PE=1 SV=1                                                               | sp Q91R182 kDa   |      | 0%  | (0.5) | unknown | 29 | 18 |
| 366 | TRUE | Empty | Cysteine-rich pericardial theca 5, isoform CRA_b OS=Mus musculus GN=Cyrt1 PE=4 SV=1                    | tr B1AX51 kDa    |      | 0%  | (1.1) | unknown | 27 | 25 |
| 367 | TRUE | Empty | Transformer-2 protein homolog beta OS=Mus musculus GN=Trab2 PE=2 SV=1                                  | tr F8WU3 kDa     |      | 0%  | (0.6) | unknown | 21 | 38 |
| 368 | TRUE | Empty | MC4R183 OS=Mus musculus GN=170009N184 PE=2 SV=1                                                        | tr Q1AA64 kDa    | TRUE | 0%  | (1.2) | unknown | 32 | 27 |
| 369 | TRUE | Empty | Protein SFR2 OS=Mus musculus GN=Sfr2 PE=2 SV=1                                                         | sp Q2JUB0 kDa    |      | 0%  | (0.5) | unknown | 15 | 18 |
| 370 | TRUE | Empty | Barrier-to-autointegration factor OS=Mus musculus GN=Banf1 PE=1 SV=1                                   | sp Q5496210 kDa  |      | 0%  | (0.6) | unknown | 16 | 25 |
| 371 | TRUE | Empty | 40S ribosomal protein S17 OS=Mus musculus GN=Rps17 PE=1 SV=2                                           | sp P63276 kDa    | TRUE | 0%  | (1.1) | unknown | 32 | 29 |
| 372 | TRUE | Empty | Casein kinase II subunit alpha OS=Mus musculus GN=Cks2b1 PE=1 SV=2                                     | sp Q607745 kDa   |      | 0%  | (0.8) | unknown | 28 | 28 |
| 373 | TRUE | Empty | Testis-expressed sequence 33 protein OS=Mus musculus GN=Tex33 PE=2 SV=1                                | sp Q29Q230 kDa   |      | 0%  | (1.0) | unknown | 27 | 27 |
| 374 | TRUE | Empty | Protein kinase, cAMP dependent, regulatory, type II alpha OS=Mus musculus GN=Pkr2a PE=2 SV=1           | tr Q8K1M6 kDa    |      | 0%  | (0.7) | unknown | 24 | 36 |
| 375 | TRUE | Empty | Sperm mitochondrial-associated cysteine-rich protein OS=Mus musculus GN=Smcp PE=2 SV=4                 | sp P15265 kDa    |      | 0%  | (0.6) | unknown | 24 | 42 |
| 376 | TRUE | Empty | Poly(ADP-ribose) polymerase 1 OS=Mus musculus GN=Ppp1 PE=1 SV=1                                        | sp Q60333 kDa    | TRUE | 0%  | (0.8) | unknown | 27 | 24 |
| 377 | TRUE | Empty | Actin-related protein T2 OS=Mus musculus GN=Artp2 PE=2 SV=1                                            | sp Q595452 kDa   |      | 0%  | (0.8) | unknown | 21 | 30 |
| 378 | TRUE | Empty | 60S ribosomal protein L21 OS=Mus musculus GN=Rpl21 PE=2 SV=3                                           | sp Q0916719 kDa  |      | 0%  | (1.3) | unknown | 26 | 20 |

|     |      |       |                                                                                                            |                   |  |      |       |         |         |    |    |
|-----|------|-------|------------------------------------------------------------------------------------------------------------|-------------------|--|------|-------|---------|---------|----|----|
| 420 | TRUE | Empty | Protein 2210010C04R8k OS=Mus musculus GN=2210010C04R8k PE=2 SV=1                                           | tr Q9CPN926.kde   |  | 0%   | (1.0) | unknown | 5       | 5  |    |
| 421 | TRUE | Empty | 60S ribosomal protein L24 OS=Mus musculus GN=Rpl24 PE=2 SV=2                                               | sp Q8BRH7.18.kde  |  | 0%   | (1.0) | unknown | 27      | 27 |    |
| 422 | TRUE | Empty | lysophosphatidyl-L-asparaginase OS=Mus musculus GN=Asp1 PE=1 SV=1                                          | sp Q8D0M.34.kde   |  | 0%   | (0.8) | unknown | 26      | 26 |    |
| 423 | TRUE | Empty | Leucine-rich repeat flightless-interacting protein 2 OS=Mus musculus GN=Lrrip2 PE=1 SV=1                   | sp Q9JW147.kde    |  | 0%   | (0.8) | unknown | 23      | 28 |    |
| 424 | TRUE | Empty | Dolichyl-diphosphooligosaccharide-protein glycosyltransferase subunit 1 OS=Mus musculus GN=Rpnt1 PE=2 SV=1 | sp Q9JY2699.kde   |  | 0%   | (1.4) | unknown | 27      | 19 |    |
| 425 | TRUE | Empty | Tetratricopeptide repeat protein 25 OS=Mus musculus GN=Trc25 PE=2 SV=3                                     | sp Q9D48722.kde   |  | 95%  | (0.7) | unknown | 16      | 33 |    |
| 426 | TRUE | Empty | Cdc45 protein OS=Mus musculus GN=Cdc45 PE=2 SV=1                                                           | tr Q9D504966.kde  |  | 0%   | (0.7) | unknown | 18      | 27 |    |
| 427 | TRUE | Empty | Cigullin OS=Mus musculus GN=Cgn PE=1 SV=1                                                                  | sp P59242.136.kde |  | TRUE | 0%    | (0.5)   | unknown | 37 | 7  |
| 428 | TRUE | Empty | 40S ribosomal protein S25 OS=Mus musculus GN=Rps25 PE=2 SV=1                                               | sp Q82B82.14.kde  |  | 0%   | (0.6) | unknown | 22      | 34 |    |
| 429 | TRUE | Empty | Radial spoke head 1 homolog OS=Mus musculus GN=Rsp1 PE=1 SV=1                                              | sp Q8R9V3.34.kde  |  | 0%   | (0.9) | unknown | 26      | 28 |    |
| 430 | TRUE | Empty | Tudor domain-containing protein 1 OS=Mus musculus GN=Tdrn1 PE=1 SV=2                                       | sp Q99M9.130.kde  |  | 0%   | (0.0) | unknown | 18      | 20 |    |
| 431 | TRUE | Empty | NHP2-like protein 1 OS=Mus musculus GN=Nhp21 PE=2 SV=1                                                     | sp Q9D0T7.114.kde |  | 0%   | (0.9) | unknown | 22      | 25 |    |
| 432 | TRUE | Empty | cAMP-dependent protein kinase type I alpha regulatory subunit OS=Mus musculus GN=Pkar1a PE=1 SV=3          | sp Q9D0K.43.kde   |  | 0%   | (0.6) | unknown | 16      | 29 |    |
| 433 | TRUE | Empty | Protein Rpl14 OS=Mus musculus GN=Rpl14 PE=1 SV=1                                                           | sp Q8B9V.75.kde   |  | 0%   | (1.0) | unknown | 29      | 29 |    |
| 434 | TRUE | Empty | T-complex protein 1 subunit theta OS=Mus musculus GN=Ctcf PE=1 SV=3                                        | sp P49332.60.kde  |  | 0%   | (1.0) | unknown | 26      | 25 |    |
| 435 | TRUE | Empty | Synaptosomal complex protein 3 OS=Mus musculus GN=Syn3 PE=1 SV=1                                           | sp P70281.29.kde  |  | TRUE | 0%    | (0.9)   | unknown | 19 | 22 |
| 436 | TRUE | Empty | Enkurin OS=Mus musculus GN=Enkur PE=1 SV=1                                                                 | sp Q86P97.30.kde  |  | 0%   | (0.7) | unknown | 17      | 24 |    |
| 437 | TRUE | Empty | Dynactin subunit 2 OS=Mus musculus GN=Da2 PE=1 SV=3                                                        | sp Q99K6.46.kde   |  | 0%   | (0.7) | unknown | 19      | 27 |    |
| 438 | TRUE | Empty | RING finger protein 17 OS=Mus musculus GN=Rnf17 PE=1 SV=2                                                  | sp Q99M9.186.kde  |  | 0%   | (0.9) | unknown | 18      | 21 |    |
| 439 | TRUE | Empty | Cytochrome b-c1 complex subunit 2, mitochondrial OS=Mus musculus GN=Uqcrc2 PE=1 SV=1                       | sp Q9D87748.kde   |  | 0%   | (1.3) | unknown | 23      | 18 |    |
| 440 | TRUE | Empty | Methyl-CpG-binding protein 1 OS=Mus musculus GN=Mecp2 PE=1 SV=1                                            | sp Q9220562.kde   |  | 0%   | (0.8) | unknown | 20      | 25 |    |
| 441 | TRUE | Empty | Cap-G domain-containing linker protein 1 OS=Mus musculus GN=Cipl1 PE=2 SV=1                                | tr F8W4V1.163.kde |  | TRUE | 0%    | (0.8)   | unknown | 18 | 19 |
| 442 | TRUE | Empty | Nuclear pore complex-associated intranuclear coiled-coil protein TPR OS=Mus musculus GN=Tpr PE=2 SV=1      | tr Q7M73E267.kde  |  | TRUE | 95%   | (0.0)   | unknown | 0  | 47 |
| 443 | TRUE | Empty | Scarfoid attachment factor B1 OS=Mus musculus GN=Salb PE=1 SV=2                                            | sp Q9JXK2.105.kde |  | TRUE | 0%    | (0.6)   | unknown | 17 | 29 |
| 444 | TRUE | Empty | Enkainin OS=Mus musculus GN=Enk1 PE=1 SV=1                                                                 | sp Q8R71582.kde   |  | 0%   | (1.1) | unknown | 22      | 20 |    |
| 445 | TRUE | Empty | DNA-directed RNA polymerase II subunit RPB1 OS=Mus musculus GN=Polr2a PE=1 SV=3                            | sp P87757.217.kde |  | 0%   | (0.6) | unknown | 11      | 19 |    |
| 446 | TRUE | Empty | Eukaryotic translation initiation factor 2 subunit 1 OS=Mus musculus GN=Elf2a1 PE=1 SV=3                   | sp Q9ZWX.36.kde   |  | 0%   | (1.4) | unknown | 26      | 19 |    |
| 447 | TRUE | Empty | Reticulocalbin-2 OS=Mus musculus GN=Rcn2 PE=2 SV=1                                                         | sp Q8BP237.kde    |  | 0%   | (1.0) | unknown | 23      | 24 |    |
| 448 | TRUE | Empty | Nuclear pore complex protein Nup133 OS=Mus musculus GN=Nup133 PE=1 SV=2                                    | sp Q8R0C.129.kde  |  | 0%   | (0.6) | unknown | 16      | 25 |    |
| 449 | TRUE | Empty | Protein-associated membrane protein-associated protein A OS=Mus musculus GN=Vapa PE=1 SV=2                 | sp Q9D9V.28.kde   |  | TRUE | 0%    | (0.9)   | unknown | 25 | 28 |
| 450 | TRUE | Empty | Protein Gm8251 OS=Mus musculus GN=Gm8251 PE=4 SV=1                                                         | tr F6U7E1.226.kde |  | TRUE | 95%   | (0.5)   | unknown | 13 | 26 |
| 451 | TRUE | Empty | Protein DnaH7b OS=Mus musculus GN=DnaH7b PE=4 SV=1                                                         | tr L7N1V0.467.kde |  | TRUE | 95%   | (0.5)   | unknown | 8  | 17 |
| 452 | TRUE | Empty | Cla3 protein OS=Mus musculus GN=Cla3 PE=1 SV=1                                                             | sp Q9D5C5.23.kde  |  | TRUE | 0%    | (1.7)   | unknown | 18 | 19 |
| 453 | TRUE | Empty | 40S ribosomal protein S26 OS=Mus musculus GN=Rps26 PE=2 SV=3                                               | sp P82859.15.kde  |  | 0%   | (1.0) | unknown | 25      | 26 |    |
| 454 | TRUE | Empty | mRNA export factor OS=Mus musculus GN=Rae1 PE=1 SV=1                                                       | sp Q957041.kde    |  | 0%   | (0.7) | unknown | 14      | 21 |    |
| 455 | TRUE | Empty | Calcium/calmodulin-dependent protein kinase type II subunit gamma OS=Mus musculus GN=Camk2g PE=1 SV=1      | sp Q9237960.kde   |  | TRUE | 95%   | (0.5)   | unknown | 16 | 33 |
| 456 | TRUE | Empty | UPF073 protein Cifor70 homolog OS=Mus musculus GN=Cifor70 PE=1 SV=1                                        | sp Q9D5C523.kde   |  | 0%   | (1.7) | unknown | 13      | 18 |    |
| 457 | TRUE | Empty | Protein Cylc2 (fragment) OS=Mus musculus GN=Cylc2 PE=2 SV=1                                                | tr B1AWN38.38.kde |  | 0%   | (1.3) | unknown | 25      | 19 |    |
| 458 | TRUE | Empty | Protein Nup153 OS=Mus musculus GN=Nup153 PE=2 SV=1                                                         | tr Q9G368.152.kde |  | 0%   | (0.3) | unknown | 8       | 24 |    |
| 459 | TRUE | Empty | 60S ribosomal protein L7A OS=Mus musculus GN=Rpl7a PE=2 SV=2                                               | sp P61514.10.kde  |  | 0%   | (1.1) | unknown | 24      | 22 |    |
| 460 | TRUE | Empty | 60S ribosomal protein L15A OS=Mus musculus GN=Rpl15a PE=2 SV=2                                             | sp Q9D5C523.kde   |  | 0%   | (1.7) | unknown | 13      | 18 |    |
| 461 | TRUE | Empty | 40S ribosomal protein S14 OS=Mus musculus GN=Rps14 PE=2 SV=3                                               | sp P22264.16.kde  |  | 0%   | (1.0) | unknown | 26      | 26 |    |
| 462 | TRUE | Empty | Dnaj homolog subfamily A member 1 OS=Mus musculus GN=Dnaj1 PE=1 SV=1                                       | sp Q9J307.45.kde  |  | 0%   | (1.0) | unknown | 22      | 22 |    |
| 463 | TRUE | Empty | Pericentriolar material 1 protein OS=Mus musculus GN=Pom1 PE=1 SV=2                                        | sp Q9R0C.229.kde  |  | 0%   | (0.8) | unknown | 17      | 21 |    |
| 464 | TRUE | Empty | Histone H3.1 OS=Mus musculus GN=Hist3h1 PE=1 SV=2                                                          | sp Q8R42.15.kde   |  | TRUE | 0%    | (0.6)   | unknown | 11 | 16 |
| 465 | TRUE | Empty | Histone H3.5 OS=Mus musculus GN=Hist3h1b PE=1 SV=2                                                         | sp P43275.23.kde  |  | 0%   | (1.0) | unknown | 23      | 23 |    |
| 466 | TRUE | Empty | AP-2 complex subunit mu OS=Mus musculus GN=Ap2m1 PE=1 SV=1                                                 | sp P84091.50.kde  |  | 0%   | (1.3) | unknown | 18      | 14 |    |
| 467 | TRUE | Empty | Tripeptidyl-peptidase 2 OS=Mus musculus GN=Tpp2 PE=2 SV=3                                                  | sp Q6454140.kde   |  | 0%   | (0.9) | unknown | 17      | 19 |    |
| 468 | TRUE | Empty | Eukaryotic translation initiation factor 2 subunit 2 OS=Mus musculus GN=Elf2b PE=1 SV=1                    | sp P45376.23.kde  |  | 0%   | (1.2) | unknown | 17      | 17 |    |
| 469 | TRUE | Empty | Structural maintenance of chromosomes protein 3 OS=Mus musculus GN=Smc3 PE=1 SV=2                          | sp Q9CWO.14.kde   |  | 0%   | (0.6) | unknown | 12      | 19 |    |
| 470 | TRUE | Empty | Ubiquitin carboxyl-terminal hydrolase isozyme L3 OS=Mus musculus GN=Uchh3 PE=1 SV=2                        | sp Q9J8K1.26.kde  |  | 0%   | (0.8) | unknown | 20      | 26 |    |
| 471 | TRUE | Empty | Dnaj homolog subfamily A member 4 OS=Mus musculus GN=Dnaj4 PE=1 SV=1                                       | sp Q9JMC.45.kde   |  | 0%   | (0.8) | unknown | 20      | 24 |    |
| 472 | TRUE | Empty | Rim-binding protein 39 OS=Mus musculus GN=Rim39 PE=1 SV=2                                                  | sp Q8R4V.159.kde  |  | 0%   | (0.7) | unknown | 17      | 16 |    |
| 473 | TRUE | Empty | Parkin coregulated gene protein homolog OS=Mus musculus GN=Par3 PE=1 SV=1                                  | sp Q9DAA.28.kde   |  | 0%   | (0.6) | unknown | 15      | 27 |    |
| 474 | TRUE | Empty | Tubulin alpha 8 chain OS=Mus musculus GN=Tuba8 PE=1 SV=1                                                   | sp Q9J2U.120.kde  |  | TRUE | 0%    | (0.8)   | unknown | 23 | 27 |
| 475 | TRUE | Empty | Sperm-associated antigen 6 OS=Mus musculus GN=Spag6 PE=1 SV=1                                              | sp Q9JL7.55.kde   |  | TRUE | 0%    | (0.6)   | unknown | 17 | 27 |
| 476 | TRUE | Empty | Indole 3 OS=Mus musculus GN=I3 PE=1 SV=1                                                                   | sp Q9JLV.89.kde   |  | 0%   | (1.0) | unknown | 20      | 20 |    |
| 477 | TRUE | Empty | Four and a half LIM domains protein 5 OS=Mus musculus GN=Fhm5 PE=1 SV=1                                    | sp Q9W7X.33.kde   |  | 0%   | (0.5) | unknown | 12      | 25 |    |
| 478 | TRUE | Empty | RNA-binding protein 25 OS=Mus musculus GN=Rbm25 PE=1 SV=2                                                  | sp B829Y5.100.kde |  | 0%   | (0.5) | unknown | 12      | 24 |    |
| 479 | TRUE | Empty | 60S ribosome OS=Mus musculus GN=R1 PE=1 SV=1                                                               | sp P45376.23.kde  |  | 0%   | (0.9) | unknown | 17      | 17 |    |
| 480 | TRUE | Empty | Ran GTPase-activating protein 1 OS=Mus musculus GN=Rangap1 PE=1 SV=2                                       | sp P40661.64.kde  |  | 0%   | (0.4) | unknown | 12      | 32 |    |
| 481 | TRUE | Empty | Proliferation-associated protein 2G4 OS=Mus musculus GN=Pa2g4 PE=1 SV=3                                    | sp P50580.44.kde  |  | 0%   | (0.9) | unknown | 14      | 16 |    |
| 482 | TRUE | Empty | W repeat-containing protein 16 OS=Mus musculus GN=Wdr16 PE=2 SV=1                                          | sp Q9J2U.120.kde  |  | 0%   | (0.8) | unknown | 16      | 21 |    |
| 483 | TRUE | Empty | Protein L10 OS=Mus musculus GN=L10 PE=2 SV=1                                                               | sp Q9ZWN.25.kde   |  | TRUE | 0%    | (1.7)   | unknown | 29 | 29 |
| 484 | TRUE | Empty | Actin-related protein T3 OS=Mus musculus GN=Actr3 PE=1 SV=1                                                | sp Q8B8F40.kde    |  | TRUE | 0%    | (1.0)   | unknown | 22 | 22 |
| 485 | TRUE | Empty | DAZ-associated protein 1 OS=Mus musculus GN=Daazp1 PE=2 SV=2                                               | sp Q9J815.43.kde  |  | 0%   | (0.8) | unknown | 20      | 24 |    |
| 486 | TRUE | Empty | 26S protease regulatory subunit 7 OS=Mus musculus GN=Pmc2 PE=1 SV=5                                        | sp P46471.49.kde  |  | 0%   | (1.2) | unknown | 21      | 17 |    |
| 487 | TRUE | Empty | 60S ribosomal protein L23 OS=Mus musculus GN=Rpl23 PE=2 SV=3                                               | sp P82267.16.kde  |  | 0%   | (1.2) | unknown | 17      | 17 |    |
| 488 | TRUE | Empty | Radial spoke head protein 3 homolog A OS=Mus musculus GN=Rsp3a PE=2 SV=1                                   | sp Q9JUF459.kde   |  | 0%   | (0.6) | unknown | 16      | 26 |    |
| 489 | TRUE | Empty | Leucine-rich repeat and coiled-coil domain-containing protein 1 OS=Mus musculus GN=Lrrcc2 PE=2 SV=2        | sp Q69280.119.kde |  | 0%   | (0.8) | unknown | 12      | 16 |    |
| 490 | TRUE | Empty | Bromodomain testis-specific protein OS=Mus musculus GN=Bre1 PE=1 SV=3                                      | sp Q9J14407.kde   |  | TRUE | 0%    | (0.9)   | unknown | 16 | 22 |
| 491 | TRUE | Empty | RNA-binding protein with serine-rich domain 1 OS=Mus musculus GN=Rbnp1 PE=1 SV=1                           | sp Q9P942.34.kde  |  | 0%   | (1.3) | unknown | 18      | 20 |    |
| 492 | TRUE | Empty | Putative ATP-dependent RNA helicase DHX30 OS=Mus musculus GN=Dhx30 PE=2 SV=1                               | sp Q9P942.34.kde  |  | 0%   | (1.0) | unknown | 15      | 15 |    |
| 493 | TRUE | Empty | Nucleoside diphosphate kinase 7 OS=Mus musculus GN=Nme7 PE=2 SV=1                                          | sp Q9DQL444.kde   |  | TRUE | 0%    | (1.1)   | unknown | 19 | 18 |
| 494 | TRUE | Empty | RuvB-like 2 OS=Mus musculus GN=RuvB2 PE=2 SV=3                                                             | sp Q9W7V.51.kde   |  | 0%   | (1.3) | unknown | 24      | 19 |    |
| 495 | TRUE | Empty | Tudor domain-containing protein 6 OS=Mus musculus GN=Tdrn6 PE=2 SV=1                                       | sp E92901.228.kde |  | 0%   | (1.2) | unknown | 17      | 14 |    |
| 496 | TRUE | Empty | Histone-binding protein RBBP4 OS=Mus musculus GN=Rbbp4 PE=1 SV=5                                           | sp Q9D97.248.kde  |  | TRUE | 0%    | (0.8)   | unknown | 16 | 20 |
| 497 | TRUE | Empty | Uncharacterized protein C17orf80 homolog OS=Mus musculus GN=D11Wu47e PE=2 SV=3                             | sp Q9P6X.60.kde   |  | 0%   | (0.6) | unknown | 16      | 26 |    |
| 498 | TRUE | Empty | Transmembrane protein ENSP00000340100 homolog OS=Mus musculus GN=ENSP00000340100 PE=1 SV=1                 | sp Q8070.01.kde   |  | TRUE | 0%    | (0.9)   | unknown | 20 | 22 |
| 499 | TRUE | Empty | Keratin, type II cytoskeletal 1 OS=Mus musculus GN=Krt15 PE=1 SV=1                                         | sp Q9220562.kde   |  | TRUE | 0%    | (1.7)   | unknown | 17 | 17 |
| 500 | TRUE | Empty | Dolichyl-diphosphooligosaccharide-protein glycosyltransferase subunit 2 OS=Mus musculus GN=Rpnt2 PE=2 SV=1 | sp Q9D86669.kde   |  | 0%   | (1.3) | unknown | 24      | 19 |    |
| 501 | TRUE | Empty | Kinesin-like protein KIFC3 OS=Mus musculus GN=Kifc3 PE=2 SV=1                                              | tr E9WUW.87.kde   |  | 0%   | (0.8) | unknown | 19      | 24 |    |
| 502 | TRUE | Empty | Karyopherin beta 7 OS=Mus musculus GN=Kap7 PE=1 SV=1                                                       | tr F8W4V.163.kde  |  | 0%   | (0.7) | unknown | 17      | 23 |    |
| 503 | TRUE | Empty | Protein regulator of cytokinesis 1 OS=Mus musculus GN=Prc1 PE=4 SV=1                                       | tr G1U1V9.67.kde  |  | 0%   | (0.7) | unknown | 12      | 18 |    |
| 504 | TRUE | Empty | High mobility group protein B2 OS=Mus musculus GN=Hmgb2 PE=1 SV=1                                          | sp P30681.24.kde  |  | TRUE | 0%    | (0.9)   | unknown | 19 | 22 |
| 505 | TRUE | Empty | 60S acidic ribosomal protein P1 OS=Mus musculus GN=Rplp1 PE=1 SV=1                                         | sp P4955.11.kde   |  | 0%   | (0.7) | unknown | 19      | 26 |    |
| 506 | TRUE | Empty | Yeast nuclear ribonucleoprotein Sm D3 OS=Mus musculus GN=SmD3 PE=1 SV=1                                    | sp P62321.14.kde  |  | 0%   | (0.8) | unknown | 16      | 16 |    |
| 507 | TRUE | Empty | 60S ribosomal protein L13 OS=Mus musculus GN=Rpl13 PE=2 SV=1                                               | sp P82900.14.kde  |  | 0%   | (1.2) | unknown | 25      | 20 |    |
| 508 | TRUE | Empty | Clusterin OS=Mus musculus GN=Clu PE=1 SV=1                                                                 | sp Q6089052.kde   |  | 0%   | (1.8) | unknown | 23      | 13 |    |
| 509 | TRUE | Empty | Actin-like protein 9 OS=Mus musculus GN=Actl9 PE=2 SV=1                                                    | sp Q8CC2.46.kde   |  | 0%   | (0.7) | unknown | 17      | 25 |    |
| 510 | TRUE | Empty | 40S ribosome OS=Mus musculus GN=R1 PE=1 SV=1                                                               | sp Q9D5C523.kde   |  | 0%   | (1.7) | unknown | 13      | 17 |    |
| 511 | TRUE | Empty | Armadillo repeat-containing protein 3 OS=Mus musculus GN=Arm3 PE=2 SV=1                                    | tr JAZU71.96.kde  |  | 0%   | (0.3) | unknown | 9       | 26 |    |
| 512 | TRUE | Empty | Peptidyl-prolyl cis-trans isomerase B OS=Mus musculus GN=Ppb PE=2 SV=2                                     | sp P24369.24.kde  |  | 0%   | (0.6) | unknown | 16      | 27 |    |
| 513 | TRUE | Empty | F-actin-capping protein subunit alpha 2 OS=Mus musculus GN=Capa2 PE=1 SV=3                                 | sp P47754.33.kde  |  | TRUE | 0%    | (0.7)   | unknown | 20 | 22 |
| 514 | TRUE | Empty | Myosin initiation factor 4A OS=Mus musculus GN=Mif4 PE=2 SV=1                                              | sp P80862.46.kde  |  | 0%   | (1.1) | unknown | 13      | 19 |    |
| 515 | TRUE | Empty | Mitochondrial-eating protein OS=Mus musculus GN=Spata8 PE=2 SV=2                                           | sp Q9P55760.kde   |  | 0%   | (0.8) | unknown | 18      | 22 |    |
| 516 | TRUE | Empty | Tudor domain-containing protein 7 OS=Mus musculus GN=Tdrn7 PE=1 SV=1                                       | sp Q8K1H122.kde   |  | 0%   | (1.3) | unknown | 16      | 12 |    |
| 517 | TRUE | Empty | Lanc-1-like protein 2 OS=Mus musculus GN=Lanc2 PE=1 SV=1                                                   | sp Q9JUC.151.kde  |  | 0%   | (1.2) | unknown | 19      | 16 |    |
| 518 | TRUE | Empty | Conventional myosin VIIb OS=Mus musculus GN=Myo7b PE=1 SV=2                                                | tr F8W4V.163.kde  |  | 0%   | (0.8) | unknown | 13      | 28 |    |
| 519 | TRUE | Empty | MCGL40564 OS=Mus musculus GN=Gm4787 PE=2 SV=1                                                              | tr B2JRD97.83.kde |  | 0%   | (1.0) | unknown | 13      | 13 |    |
| 520 | TRUE | Empty | Gene model 1141, (NCBI) OS=Mus musculus GN=Gm1141 PE=2 SV=1                                                | tr B9E1U.152.kde  |  | 0%   | (0.4) | unknown | 11      | 28 |    |
| 521 | TRUE | Empty | Unconventional myosin-Va OS=Mus musculus GN=Myo5a PE=2 SV=1                                                | tr D3262.212.kde  |  | TRUE | 0%    | (0.6)   | unknown | 10 | 18 |
| 522 | TRUE | Empty | EF-hand domain-containing protein 6 OS=Mus musculus GN=Efhd6 PE=2 SV=1                                     | tr Q82465.27.kde  |  | 0%   | (1.1) | unknown | 16      | 19 |    |
| 523 | TRUE | Empty | 40S ribosomal protein S24 OS=Mus musculus GN=Rps24 PE=1 SV=1                                               | sp P82845.15.kde  |  | 0%   | (1.0) | unknown | 22      | 21 |    |
| 524 | TRUE | Empty | Tubulin beta 5 chain OS=Mus musculus GN=Tubb5 PE=1 SV=1                                                    | sp P90024.50.kde  |  | TRUE | 0%    | (1.1)   | unknown | 21 | 21 |
| 525 | TRUE | Empty | Protein ELKS OS=Mus musculus GN=Elks PE=1 SV=1                                                             | sp Q9JF7.248.kde  |  | 0%   | (0.3) | unknown | 6       | 21 |    |
| 526 | TRUE | Empty | Protein Drl1 OS=Mus musculus GN=Drl1 PE=2 SV=1                                                             | sp Q9J1W.19.kde   |  | 0%   | (0.9) | unknown | 19      | 23 |    |
| 527 | TRUE | Empty | Coiled-coil domain-containing protein 39 OS=Mus musculus GN=Cck39 PE=2 SV=1                                | sp Q9D5Y1110.kde  |  | 0%   | (0.5) | unknown | 11      | 24 |    |
| 528 | TRUE | Empty | Profilin-3 OS=Mus musculus GN=Pfn3 PE=1 SV=1                                                               | sp Q9D0A.15.kde   |  | 0%   | (1.0) | unknown | 20      | 20 |    |
| 529 | TRUE | Empty | 529S OS=Mus musculus GN=529S1 PE=2 SV=2                                                                    | sp Q9D90.36.kde   |  | 0%   | (0.9) | unknown | 20      | 23 |    |
| 530 | TRUE | Empty | Pre-mRNA-processing factor 40 homolog A OS=Mus musculus GN=Ppf40a PE=1 SV=1                                | sp Q9R1C7108.kde  |  | 0%   | (0.7) | unknown | 15      | 22 |    |

|     |      |       |                                                                                                                   |                   |      |       |         |         |    |    |
|-----|------|-------|-------------------------------------------------------------------------------------------------------------------|-------------------|------|-------|---------|---------|----|----|
| 573 | TRUE | Empty | Dehydrogenase/reductase SDR family member 4 OS-Mus musculus GN=Dhrs4 PE=2 SV=3                                    | sp Q99L82.30.kDa  | 0%   | (0.9) | unknown | 18      | 20 |    |
| 574 | TRUE | Empty | NADH dehydrogenase [ubiquinone] 1 alpha subcomplex subunit 10, mitochondrial OS-Mus musculus GN=Ndufa10 PE=1 SV=1 | sp Q99L41.kDa     | 0%   | (0.9) | unknown | 18      | 19 |    |
| 575 | TRUE | Empty | Serine/threonine kinase 31 OS-Mus musculus GN=Skn31 PE=2 SV=2                                                     | sp Q99M115.kDa    | 0%   | (0.9) | unknown | 22      | 9  |    |
| 576 | TRUE | Empty | Splicing factor 3A subunit 3 OS-Mus musculus GN=SF3A3 PE=2 SV=2                                                   | sp Q90S549.kDa    | 0%   | (0.8) | unknown | 13      | 17 |    |
| 577 | TRUE | Empty | Glutaminyl-tRNA synthetase OS-Mus musculus GN=Dars PE=2 SV=1                                                      | tr Q88M188.kDa    | 0%   | (1.0) | unknown | 14      | 14 |    |
| 578 | TRUE | Empty | Four and a half LIM domain 1 OS-Mus musculus GN=FHL4 PE=2 SV=1                                                    | tr Q80C03.32.kDa  | 0%   | (1.1) | unknown | 18      | 16 |    |
| 579 | TRUE | Empty | Plastocyanin cytochrome b557 OS-Mus musculus GN=Pcyb PE=2 SV=2                                                    | tr Q921W46.kDa    | TRUE | 0%    | (0.8)   | unknown | 17 | 22 |
| 580 | TRUE | Empty | 40S ribosomal protein S19 (Fragment) OS-Mus musculus GN=Rps19 PE=2 SV=1                                           | tr D3YU33.15.kDa  | TRUE | 95%   | (INF)   | unknown | 34 | 0  |
| 581 | TRUE | Empty | Lamin-B2 OS-Mus musculus GN=LmnB2 PE=1 SV=2                                                                       | sp P21619.67.kDa  | TRUE | 0%    | (0.8)   | unknown | 12 | 15 |
| 582 | TRUE | Empty | Paraoxonase OS-Mus musculus GN=Par1 PE=1 SV=2                                                                     | sp A57325.235.kDa | 0%   | (0.9) | unknown | 12      | 11 |    |
| 583 | TRUE | Empty | Protein DDC8 OS-Mus musculus GN=DDC8 PE=2 SV=1                                                                    | sp A497M62.kDa    | 0%   | (0.9) | unknown | 15      | 17 |    |
| 584 | TRUE | Empty | RNA-binding protein Raly OS-Mus musculus GN=Raly PE=1 SV=3                                                        | sp Q6041233.kDa   | 0%   | (1.1) | unknown | 18      | 16 |    |
| 585 | TRUE | Empty | Septin-10 OS-Mus musculus GN=Sept10 PE=2 SV=1                                                                     | sp Q8C5052.kDa    | TRUE | 0%    | (0.5)   | unknown | 11 | 21 |
| 586 | TRUE | Empty | Phosphogluconate phosphatase OS-Mus musculus GN=Pgp PE=2 SV=1                                                     | sp Q8C9135.kDa    | 0%   | (0.9) | unknown | 17      | 20 |    |
| 587 | TRUE | Empty | UAP56-interacting factor OS-Mus musculus GN=Fytfd1 PE=1 SV=1                                                      | sp Q91249.36.kDa  | 0%   | (1.2) | unknown | 14      | 12 |    |
| 588 | TRUE | Empty | Aconitate hydratase, mitochondrial OS-Mus musculus GN=Aco2 PE=1 SV=1                                              | sp Q99K01.85.kDa  | 95%  | (2.0) | unknown | 20      | 10 |    |
| 589 | TRUE | Empty | ATP-binding cassette sub-family F member 2 OS-Mus musculus GN=Abct2 PE=2 SV=1                                     | sp Q99L66.77.kDa  | 0%   | (1.5) | unknown | 17      | 11 |    |
| 590 | TRUE | Empty | H/ACA ribonucleoprotein complex subunit 4 OS-Mus musculus GN=Hnc1 PE=1 SV=4                                       | sp Q99K577.kDa    | 0%   | (0.7) | unknown | 14      | 21 |    |
| 591 | TRUE | Empty | Casein kinase 1 isoform alpha OS-Mus musculus GN=Cnk1A1 PE=2 SV=1                                                 | tr H7XK1.39.kDa   | 0%   | (0.9) | unknown | 15      | 16 |    |
| 592 | TRUE | Empty | Fibrous sheath CABYR-binding protein OS-Mus musculus GN=Fcbb PE=1 SV=1                                            | sp A1EGK6115.kDa  | 95%  | (0.4) | unknown | 10      | 24 |    |
| 593 | TRUE | Empty | Argininosuccinate synthase OS-Mus musculus GN=Asst PE=1 SV=1                                                      | sp P14640.47.kDa  | 95%  | (2.8) | unknown | 14      | 5  |    |
| 594 | TRUE | Empty | Calnexin OS-Mus musculus GN=Cnx1 PE=2 SV=1                                                                        | sp P35561.67.kDa  | 0%   | (1.5) | unknown | 23      | 15 |    |
| 595 | TRUE | Empty | Serine protease 46 OS-Mus musculus GN=Prs46 PE=2 SV=2                                                             | sp Q5MS85.35.kDa  | 0%   | (1.3) | unknown | 18      | 14 |    |
| 596 | TRUE | Empty | Armadillo repeat-containing protein 12 OS-Mus musculus GN=Armc12 PE=2 SV=1                                        | sp Q80X8639.kDa   | 0%   | (0.7) | unknown | 15      | 21 |    |
| 597 | TRUE | Empty | Isocitrate-lyase, cytoplasmic OS-Mus musculus GN=Icy PE=2 SV=2                                                    | sp Q8BU1144.kDa   | 0%   | (0.8) | unknown | 10      | 12 |    |
| 598 | TRUE | Empty | Bifunctional glutamate/protein-tRNA ligase OS-Mus musculus GN=Gfpr PE=1 SV=4                                      | sp Q8C9C1170.kDa  | 0%   | (1.3) | unknown | 13      | 10 |    |
| 599 | TRUE | Empty | Myosin light chain 6B OS-Mus musculus GN=Mylic6 PE=2 SV=1                                                         | sp Q8C413.23.kDa  | TRUE | 0%    | (0.8)   | unknown | 14 | 19 |
| 600 | TRUE | Empty | Dnaj homolog subfamily C member 7 OS-Mus musculus GN=DnajC7 PE=1 SV=2                                             | sp Q9QY13.56.kDa  | 0%   | (1.1) | unknown | 12      | 11 |    |
| 601 | TRUE | Empty | H/ACA ribonucleoprotein complex subunit 1 (Fragment) OS-Mus musculus GN=Gart1 PE=2 SV=1                           | tr D3Y209.20.kDa  | 0%   | (0.8) | unknown | 9       | 12 |    |
| 602 | TRUE | Empty | General transcription factor TFIID subunit 1 OS-Mus musculus GN=TFIID1 PE=2 SV=1                                  | tr E9C8T7.487.kDa | 95%  | (0.6) | unknown | 4       | 17 |    |
| 603 | TRUE | Empty | General transcription factor IIIH subunit 1 OS-Mus musculus GN=GIH21 PE=2 SV=1                                    | tr E9QK07.62.kDa  | 0%   | (0.8) | unknown | 13      | 16 |    |
| 604 | TRUE | Empty | MCG15602 OS-Mus musculus GN=Dnaj13 PE=4 SV=1                                                                      | tr Q3K922.254.kDa | 0%   | (1.4) | unknown | 15      | 11 |    |
| 605 | TRUE | Empty | Alpha globin 1 OS-Mus musculus GN=Hb1 PE=1 SV=1                                                                   | tr Q93V818.15.kDa | 0%   | (1.3) | unknown | 18      | 14 |    |
| 606 | TRUE | Empty | Protein Sfrp5 OS-Mus musculus GN=Sfr5 PE=2 SV=1                                                                   | tr Q3T1W39.kDa    | TRUE | 0%    | (1.2)   | unknown | 6  | 5  |
| 607 | TRUE | Empty | Dynein light chain 1, cytoplasmic OS-Mus musculus GN=Dynl11 PE=1 SV=1                                             | sp P31631.10.kDa  | TRUE | 0%    | (1.0)   | unknown | 19 | 19 |
| 608 | TRUE | Empty | 40S ribosomal protein S19 OS-Mus musculus GN=Rps19 PE=1 SV=3                                                      | sp Q9C2C8.16.kDa  | TRUE | 95%   | (0.0)   | unknown | 0  | 31 |
| 609 | TRUE | Empty | Probable C-mannosyltransferase DPT192 OS-Mus musculus GN=Dpt192 PE=1 SV=1                                         | sp P3CWC790.kDa   | 0%   | (0.9) | unknown | 17      | 15 |    |
| 610 | TRUE | Empty | Tumor suppressor p53-binding protein 1 OS-Mus musculus GN=Tp53bp1 PE=1 SV=2                                       | sp P30321.21.kDa  | 95%  | (0.2) | unknown | 4       | 23 |    |
| 611 | TRUE | Empty | Uncharacterized protein C7orf72 homolog OS-Mus musculus PE=2 SV=2                                                 | sp Q9C8N150.kDa   | 95%  | (0.3) | unknown | 4       | 15 |    |
| 612 | TRUE | Empty | Meiosis-specific nuclear structural protein 1 OS-Mus musculus GN=Mnsl PE=1 SV=1                                   | sp Q9188460.kDa   | 0%   | (1.4) | unknown | 11      | 8  |    |
| 613 | TRUE | Empty | Poly(r) binding protein 2 OS-Mus musculus GN=Pbbp2 PE=1 SV=1                                                      | sp Q99K398.kDa    | TRUE | 0%    | (0.9)   | unknown | 18 | 13 |
| 614 | TRUE | Empty | 40S ribosomal protein S27-like OS-Mus musculus GN=Rps27L PE=2 SV=3                                                | sp Q9CZVY.9.kDa   | TRUE | 0%    | (1.2)   | unknown | 14 | 12 |
| 615 | TRUE | Empty | ATP-dependent RNA helicase DDX39A OS-Mus musculus GN=DDX39A PE=2 SV=1                                             | sp Q9DVA9.49.kDa  | TRUE | 95%   | (1.9)   | unknown | 27 | 3  |
| 616 | TRUE | Empty | Toll-interacting protein OS-Mus musculus GN=Tipip PE=1 SV=1                                                       | sp Q9DQZ0.30.kDa  | 0%   | (0.8) | unknown | 12      | 15 |    |
| 617 | TRUE | Empty | Protein hif OS-Mus musculus GN=Hif PE=2 SV=2                                                                      | sp Q92318.66.kDa  | 0%   | (0.8) | unknown | 15      | 18 |    |
| 618 | TRUE | Empty | Fructose-bisphosphate aldolase OS-Mus musculus GN=Aldoa1 PE=2 SV=1                                                | tr A24261.45.kDa  | TRUE | 0%    | (0.8)   | unknown | 13 | 19 |
| 619 | TRUE | Empty | SWI/SNF complex subunit SMARCC2 OS-Mus musculus GN=Smrcc2 PE=2 SV=1                                               | tr Q3U100.125.kDa | TRUE | 0%    | (0.6)   | unknown | 9  | 16 |
| 620 | TRUE | Empty | Nucleosome assembly protein 1-like 1 OS-Mus musculus GN=Nap111 PE=1 SV=2                                          | sp P28652.45.kDa  | TRUE | 0%    | (1.1)   | unknown | 17 | 16 |
| 621 | TRUE | Empty | Protein NCOB2-disassociated protein 1 OS-Mus musculus GN=Ncdp1 PE=2 SV=2                                          | sp Q99K1168.kDa   | 0%   | (1.1) | unknown | 12      | 16 |    |
| 622 | TRUE | Empty | Nuclear pore complex protein Nup214 OS-Mus musculus GN=Nup214 PE=1 SV=2                                           | sp Q80U91213.kDa  | 95%  | (0.2) | unknown | 4       | 16 |    |
| 623 | TRUE | Empty | Barrier-to-autointegration factor-like protein OS-Mus musculus GN=Barf2 PE=2 SV=1                                 | sp Q8BRVC.10.kDa  | 0%   | (0.9) | unknown | 16      | 17 |    |
| 624 | TRUE | Empty | Structural maintenance of chromosomes protein 5 OS-Mus musculus GN=Smc5 PE=2 SV=1                                 | sp Q9C6A129.kDa   | 0%   | (0.6) | unknown | 7       | 12 |    |
| 625 | TRUE | Empty | Cytoskeleton type II cytokeleton 2 epimeral OS-Mus musculus GN=Cyc1 PE=1 SV=4                                     | sp Q99M30.35.kDa  | 0%   | (1.0) | unknown | 16      | 16 |    |
| 626 | TRUE | Empty | Actin-related protein T1 OS-Mus musculus GN=Actr11 PE=2 SV=1                                                      | sp Q90913.42.kDa  | 0%   | (0.8) | unknown | 9       | 12 |    |
| 627 | TRUE | Empty | Dynein light chain roadblock-type 2 OS-Mus musculus GN=Dynl2 PE=1 SV=1                                            | sp Q9D5A151.kDa   | 0%   | (0.9) | unknown | 17      | 18 |    |
| 628 | TRUE | Empty | Actin-like protein 78 OS-Mus musculus GN=Actl78 PE=2 SV=2                                                         | sp Q9D2V146.kDa   | 0%   | (0.9) | unknown | 13      | 15 |    |
| 629 | TRUE | Empty | 1700101G10R1 protein OS-Mus musculus GN=1700101G10R1 PE=2 SV=1                                                    | tr B2PWC132.kDa   | 0%   | (0.7) | unknown | 10      | 15 |    |
| 630 | TRUE | Empty | MCG113054, isoform CRA_A OS-Mus musculus GN=Ce85 PE=1 SV=2                                                        | tr E9QA61.92.kDa  | 0%   | (0.5) | unknown | 9       | 17 |    |
| 631 | TRUE | Empty | Serine hydroxymethyltransferase (Epimeral) OS-Mus musculus GN=Shmt1 PE=3 SV=1                                     | tr Q3U226.48.kDa  | 0%   | (1.1) | unknown | 11      | 10 |    |
| 632 | TRUE | Empty | Protein type II cytokeleton 2 epimeral OS-Mus musculus GN=Cyc2 PE=2 SV=1                                          | sp Q3T71571.kDa   | TRUE | 0%    | (1.7)   | unknown | 22 | 13 |
| 633 | TRUE | Empty | Pisrin OS-Mus musculus GN=Pisr PE=2 SV=1                                                                          | tr Q3TUL02583.kDa | TRUE | 95%   | (0.0)   | unknown | 10 | 19 |
| 634 | TRUE | Empty | Uncharacterized protein C19orf71 homolog OS-Mus musculus PE=2 SV=1                                                | sp JA6H6Q24.kDa   | 95%  | (0.5) | unknown | 7       | 15 |    |
| 635 | TRUE | Empty | Transcription elongation factor SPT5 OS-Mus musculus GN=Sup5h PE=1 SV=1                                           | sp Q5D521121.kDa  | 0%   | (1.1) | unknown | 16      | 14 |    |
| 636 | TRUE | Empty | Protein disulfide-isomerase OS-Mus musculus GN=Pdi3 PE=1 SV=2                                                     | sp P30153.57.kDa  | 0%   | (1.5) | unknown | 10      | 16 |    |
| 637 | TRUE | Empty | Histone H2A OS-Mus musculus GN=H2af1 PE=1 SV=2                                                                    | sp P3C056.14.kDa  | TRUE | 0%    | (0.9)   | unknown | 17 | 19 |
| 638 | TRUE | Empty | Septin-4 OS-Mus musculus GN=Sept4 PE=1 SV=1                                                                       | sp P28661.55.kDa  | TRUE | 0%    | (0.8)   | unknown | 14 | 18 |
| 639 | TRUE | Empty | DOB1- and CUL4-associated factor 7 OS-Mus musculus GN=Dcaf7 PE=2 SV=1                                             | sp P31961.39.kDa  | 0%   | (0.9) | unknown | 13      | 14 |    |
| 640 | TRUE | Empty | RNA repair protein ORC2 OS-Mus musculus GN=Orc2 PE=1 SV=1                                                         | sp Q99S09169.kDa  | 0%   | (0.9) | unknown | 18      | 13 |    |
| 641 | TRUE | Empty | DBIRD complex subunit KAA1967 homolog OS-Mus musculus PE=1 SV=2                                                   | sp Q9DVR103.kDa   | 0%   | (1.0) | unknown | 11      | 11 |    |
| 642 | TRUE | Empty | Leucine-rich repeat-containing protein 59 OS-Mus musculus GN=Lrrc59 PE=2 SV=1                                     | sp Q922Q235.kDa   | 0%   | (1.2) | unknown | 18      | 15 |    |
| 643 | TRUE | Empty | Uncharacterized protein C10orf98 homolog OS-Mus musculus PE=2 SV=1                                                | sp Q9C2C176.kDa   | 0%   | (0.8) | unknown | 12      | 16 |    |
| 644 | TRUE | Empty | Nuclear pore complex protein Nup50 OS-Mus musculus GN=Nup50 PE=3 SV=3                                             | tr E9C9M1.49.kDa  | 0%   | (0.6) | unknown | 11      | 17 |    |
| 645 | TRUE | Empty | G-kinase-anchoring protein 1 OS-Mus musculus GN=Gkap1 PE=1 SV=1                                                   | sp Q99M48.42.kDa  | 0%   | (1.0) | unknown | 15      | 15 |    |
| 646 | TRUE | Empty | Hepatoma-derived growth factor-related protein 3 OS-Mus musculus GN=Hdgrf3 PE=1 SV=2                              | sp Q9JMG2.22.kDa  | TRUE | 0%    | (0.8)   | unknown | 11 | 20 |
| 647 | TRUE | Empty | MCG21756, isoform CRA_B OS-Mus musculus GN=Nup205 PE=2 SV=1                                                       | tr B9J3J4.127.kDa | 95%  | (0.5) | unknown | 7       | 15 |    |
| 648 | TRUE | Empty | 40S ribosomal protein S4 OS-Mus musculus GN=Rps4 PE=3 SV=1                                                        | tr D3YTT7.33.kDa  | 0%   | (0.7) | unknown | 13      | 18 |    |
| 649 | TRUE | Empty | Protein Ugg2 OS-Mus musculus GN=Ugg2 PE=2 SV=1                                                                    | tr E9Q4X2.173.kDa | 0%   | (0.9) | unknown | 10      | 11 |    |
| 650 | TRUE | Empty | Protein Rbm22 OS-Mus musculus GN=Rbm22 PE=2 SV=1                                                                  | tr Q9D4Z2.42.kDa  | 0%   | (0.9) | unknown | 16      | 18 |    |
| 651 | TRUE | Empty | Serine/arginine-rich splicing factor 5 OS-Mus musculus GN=Srsf5 PE=1 SV=2                                         | sp Q9525383.kDa   | 0%   | (1.0) | unknown | 13      | 13 |    |
| 652 | TRUE | Empty | Cytoskeleton-specific protein 8 OS-Mus musculus GN=Csp8 PE=1 SV=2                                                 | sp Q9D77956.kDa   | 0%   | (0.8) | unknown | 8       | 13 |    |
| 653 | TRUE | Empty | Uncharacterized protein C15orf26 homolog OS-Mus musculus PE=2 SV=1                                                | sp Q99YV034.kDa   | 0%   | (0.8) | unknown | 15      | 19 |    |
| 654 | TRUE | Empty | Bromodomain-containing protein 2 OS-Mus musculus GN=Brd2 PE=1 SV=1                                                | sp Q7J113188.kDa  | TRUE | 0%    | (0.8)   | unknown | 10 | 13 |
| 655 | TRUE | Empty | RNA-binding protein 14 OS-Mus musculus GN=Rbn14 PE=1 SV=1                                                         | sp Q9C2C169.kDa   | TRUE | 0%    | (0.7)   | unknown | 12 | 18 |
| 656 | TRUE | Empty | Beta-defensin 19 OS-Mus musculus GN=Defb19 PE=2 SV=1                                                              | sp Q9K38.10.kDa   | 0%   | (1.0) | unknown | 14      | 14 |    |
| 657 | TRUE | Empty | 60S ribosomal protein L11 OS-Mus musculus GN=Rpl11 PE=1 SV=4                                                      | sp Q9CVCW.20.kDa  | 0%   | (1.2) | unknown | 17      | 14 |    |
| 658 | TRUE | Empty | Uncharacterized protein OS-Mus musculus GN=Tpm37 PE=3 SV=1                                                        | tr D3Z2H9.29.kDa  | TRUE | 0%    | (0.9)   | unknown | 16 | 13 |
| 659 | TRUE | Empty | Protein 493241S10R8 OS-Mus musculus GN=493241S10R8 PE=4 SV=1                                                      | tr E9C0M1.64.kDa  | 0%   | (0.6) | unknown | 10      | 16 |    |
| 660 | TRUE | Empty | SPAT1 isoform OS-Mus musculus GN=Spata7 PE=2 SV=1                                                                 | tr Q3T1L3.62.kDa  | 0%   | (0.6) | unknown | 10      | 17 |    |
| 661 | TRUE | Empty | Protein DnaH6 OS-Mus musculus GN=DnaH6 PE=2 SV=1                                                                  | tr E9Q0K6.475.kDa | 95%  | (0.2) | unknown | 3       | 18 |    |
| 662 | TRUE | Empty | Heme oxygenase 2 OS-Mus musculus GN=Hmo2 PE=2 SV=1                                                                | sp Q70236.236.kDa | 0%   | (0.9) | unknown | 13      | 15 |    |
| 663 | TRUE | Empty | PL2F protein kinase 1 OS-Mus musculus GN=Pfk1 PE=2 SV=2                                                           | sp Q70551.173.kDa | TRUE | 0%    | (1.3)   | unknown | 14 | 12 |
| 664 | TRUE | Empty | Ubiquitin carboxyl-terminal hydrolase 5 OS-Mus musculus GN=Ubp5 PE=1 SV=1                                         | sp P35399.96.kDa  | 0%   | (0.8) | unknown | 11      | 13 |    |
| 665 | TRUE | Empty | Vinculin OS-Mus musculus GN=Vcl PE=1 SV=4                                                                         | sp Q64727.117.kDa | 95%  | (0.4) | unknown | 7       | 19 |    |
| 666 | TRUE | Empty | Leucine-tRNA ligase, cytoplasmic OS-Mus musculus GN=Lars PE=2 SV=2                                                | sp Q8BM4.114.kDa  | 0%   | (1.1) | unknown | 10      | 9  |    |
| 667 | TRUE | Empty | Leucyl-tRNA synthetase 2 OS-Mus musculus GN=Lys2 PE=2 SV=3                                                        | sp Q9C9C3.82.kDa  | 0%   | (0.8) | unknown | 13      | 16 |    |
| 668 | TRUE | Empty | Inactive serine/threonine-protein kinase VRK3 OS-Mus musculus GN=Vrk3 PE=1 SV=2                                   | sp Q8K3G551.kDa   | 95%  | (0.3) | unknown | 5       | 15 |    |
| 669 | TRUE | Empty | THO complex subunit 1 OS-Mus musculus GN=Thoc1 PE=1 SV=1                                                          | sp Q8R3N75.75.kDa | 0%   | (0.7) | unknown | 11      | 16 |    |
| 670 | TRUE | Empty | Proteasome subunit alpha-type 1-like OS-Mus musculus GN=Pmab PE=2 SV=1                                            | sp Q9CWC126.kDa   | TRUE | 0%    | (0.7)   | unknown | 13 | 18 |
| 671 | TRUE | Empty | Lymphocyte antigen 6K OS-Mus musculus GN=Ly6k PE=2 SV=1                                                           | sp Q9CVCW.17.kDa  | 0%   | (0.8) | unknown | 11      | 18 |    |
| 672 | TRUE | Empty | Charged multivesicular body protein 4b OS-Mus musculus GN=Chmp4b PE=2 SV=2                                        | sp Q908B125.kDa   | 0%   | (1.4) | unknown | 18      | 13 |    |
| 673 | TRUE | Empty | Coiled-coil domain-containing protein 91 OS-Mus musculus GN=Ccd91 PE=2 SV=2                                       | sp Q90S1550.kDa   | 0%   | (0.7) | unknown | 12      | 18 |    |
| 674 | TRUE | Empty | Peroxiredoxin-4 (Fragment) OS-Mus musculus GN=Ppx4 PE=2 SV=1                                                      | tr B1A2S91.26.kDa | TRUE | 95%   | (0.0)   | unknown | 0  | 28 |
| 675 | TRUE | Empty | Protein Fanf7a1 OS-Mus musculus GN=Fanf71 PE=4 SV=1                                                               | tr D3YV5.50.kDa   | 0%   | (0.9) | unknown | 10      | 16 |    |
| 676 | TRUE | Empty | Protein Spata311c1 OS-Mus musculus GN=Spata311c1 PE=4 SV=1                                                        | tr E9QA71.95.kDa  | 0%   | (0.6) | unknown | 11      | 17 |    |
| 677 | TRUE | Empty | Expressed sequence BB014433 OS-Mus musculus GN=BB014433 PE=2 SV=1                                                 | tr Q8C5F5.22.kDa  | 0%   | (0.8) | unknown | 11      | 14 |    |
| 678 | TRUE | Empty | Histone H1.0 OS-Mus musculus GN=H10 PE=2 SV=4                                                                     | tr P30921.21.kDa  | 0%   | (1.2) | unknown | 16      | 13 |    |
| 679 | TRUE | Empty | Ubiquone biosynthesis monooxygenase COO3 (Fragment) OS-Mus musculus GN=Coo3 PE=4 SV=1                             | sp F1E240.12.kDa  | 0%   | (0.0) | unknown | 10      | 7  |    |
| 680 | TRUE | Empty | Nucleoporin TPR OS-Mus musculus GN=Tpr PE=1 SV=1                                                                  | sp F6Z624.274.kDa | TRUE | 95%   | (INF)   | unknown | 25 | 0  |
| 681 | TRUE | Empty | Uncharacterized coiled-coil domain-containing protein KIAA1984 OS-Mus musculus GN=Kiaa1984 PE=2 SV=1              | sp A24A11.62.kDa  | 95%  | (0.4) | unknown | 8       | 19 |    |
| 682 | TRUE | Empty | Y-box binding protein 1 OS-Mus musculus GN=Ybx1 PE=2 SV=1                                                         | sp E9P9Y5.90.kDa  | 95%  | (0.3) | unknown | 6       | 18 |    |
| 683 | TRUE | Empty | Methionine aminopeptidase 2 OS-Mus musculus GN=Metap2 PE=1 SV=1                                                   | sp Q908G153.kDa   | 0%   | (0.9) | unknown | 12      | 13 |    |
| 684 | TRUE | Empty | U2 small nuclear ribonucleoprotein A OS-Mus musculus GN=SnrpA1 PE=1 SV=2                                          | sp P37784.28.kDa  | 0%   | (0.9) | unknown | 13      | 14 |    |
| 685 | TRUE | Empty | 40S ribosomal protein S20 OS-Mus musculus GN=Rps20 PE=1 SV=1                                                      | sp P30807.13.kDa  | 0%   | (0.8) | unknown | 9       | 11 |    |
| 686 | TRUE | Empty | SAC3D2 domain-binding protein 1-like protein OS-Mus musculus GN=Shcp11 PE=2 SV=1                                  | sp Q3J17071.kDa   | 0%   | (0.6) | unknown | 9       | 15 |    |
| 687 | TRUE | Empty | Interferon-stimulated 20 kDa exonuclease-like 2 OS-Mus musculus GN=Ihg202 PE=2 SV=2                               | sp Q3J1G141.kDa   | 0%   | (1.0) | unknown |         |    |    |

|     |      |       |                                                                                                           |                     |      |       |         |         |    |    |
|-----|------|-------|-----------------------------------------------------------------------------------------------------------|---------------------|------|-------|---------|---------|----|----|
| 726 | TRUE | Empty | Phosphate carrier protein, mitochondrial OS-Mus-musculus GN-Slc25a3 PE-1 SV-1                             | sp Q8VEM4 40 kDa    | 0%   | (1.4) | unknown | 14      | 10 |    |
| 727 | TRUE | Empty | DnaJ homolog subfamily C member 9 OS-Mus-musculus GN-Hdnaj9 PE-2 SV-2                                     | sp Q21RM30 30 kDa   | 0%   | (0.6) | unknown | 11      | 20 |    |
| 728 | TRUE | Empty | Deletive diaphanous kinase homolog 5 OS-Mus-musculus GN-Hdm5 PE-2 SV-2                                    | sp Q29M44 24 kDa    | 95%  | (2.4) | unknown | 7       | 15 |    |
| 729 | TRUE | Empty | Drf1-associated corepressor OS-Mus-musculus GN-Drap1 PE-2 SV-3                                            | sp Q06N62 22 kDa    | 0%   | (0.7) | unknown | 13      | 18 |    |
| 730 | TRUE | Empty | Proteasome subunit alpha type-4 OS-Mus-musculus GN-Psm4 PE-1 SV-1                                         | sp Q0R1P29 29 kDa   | 0%   | (1.2) | unknown | 15      | 12 |    |
| 731 | TRUE | Empty | Apoptosis-inducing factor 1, mitochondrial OS-Mus-musculus GN-Admi1 PE-1 SV-1                             | sp Q20D167 67 kDa   | 0%   | (0.9) | unknown | 10      | 11 |    |
| 732 | TRUE | Empty | Protein Slc25a4 OS-Mus-musculus GN-Slc25a4 PE-2 SV-1                                                      | sp Q48ZU2 34 kDa    | 0%   | (1.0) | unknown | 14      | 14 |    |
| 733 | TRUE | Empty | Prostaglandin F synthase 3 OS-Mus-musculus GN-Pgfs3 PE-1 SV-1                                             | sp Q090Q2 19 kDa    | 95%  | (3.8) | unknown | 15      | 4  |    |
| 734 | TRUE | Empty | Spliceosome RNA helicase Ddx39b OS-Mus-musculus GN-Hdxd39b PE-1 SV-1                                      | sp Q27H149 49 kDa   | TRUE | 95%   | (2.7)   | unknown | 8  | 9  |
| 735 | TRUE | Empty | Protein 17 alpha-hydroxysteroid 17,20 lyase OS-Mus-musculus GN-Hcy17a1 PE-2 SV-1                          | sp P27785 58 kDa    | 0%   | (1.5) | unknown | 15      | 15 |    |
| 736 | TRUE | Empty | Catenin delta-1 OS-Mus-musculus GN-Ctnd1 PE-1 SV-2                                                        | sp Q09091 65 kDa    | 0%   | (0.7) | unknown | 10      | 14 |    |
| 737 | TRUE | Empty | Kinesin-associated protein 3 OS-Mus-musculus GN-Kif3a3 PE-1 SV-1                                          | sp P70189 31 kDa    | TRUE | 95%   | (0.3)   | unknown | 6  | 18 |
| 738 | TRUE | Empty | RNA-binding protein 44 OS-Mus-musculus GN-Rbm44 PE-1 SV-1                                                 | sp Q3V0811 21 kDa   | 0%   | (0.7) | unknown | 8       | 12 |    |
| 739 | TRUE | Empty | 2-oxoglutarate dehydrogenase, mitochondrial OS-Mus-musculus GN-HOgdh PE-1 SV-3                            | sp Q05071 15 kDa    | 0%   | (1.8) | unknown | 11      | 6  |    |
| 740 | TRUE | Empty | Catenin alpha-3 OS-Mus-musculus GN-Cttna3 PE-1 SV-2                                                       | sp Q05CL1 100 kDa   | TRUE | 95%   | (0.3)   | unknown | 5  | 15 |
| 741 | TRUE | Empty | Methionine aminopeptidase 1 OS-Mus-musculus GN-Metap1 PE-2 SV-1                                           | sp Q8B4843 43 kDa   | 0%   | (0.6) | unknown | 9       | 15 |    |
| 742 | TRUE | Empty | Nuclear pore complex protein Nup88 OS-Mus-musculus GN-Nup88 PE-2 SV-2                                     | sp Q8C2085 24 kDa   | 95%  | (0.4) | unknown | 7       | 17 |    |
| 743 | TRUE | Empty | DNA-directed RNA polymerase II subunit RP2 OS-Mus-musculus GN-Polr2b PE-2 SV-2                            | sp Q8C57 134 kDa    | 95%  | (0.4) | unknown | 6       | 15 |    |
| 744 | TRUE | Empty | Routelien OS-Mus-musculus GN-Croc PE-1 SV-2                                                               | sp Q8C140 227 kDa   | 0%   | (0.7) | unknown | 6       | 9  |    |
| 745 | TRUE | Empty | 5-oxoprolinase OS-Mus-musculus GN-Oplah PE-2 SV-1                                                         | sp Q8K011038 38 kDa | 0%   | (0.9) | unknown | 8       | 9  |    |
| 746 | TRUE | Empty | Nucleoporin SH1 OS-Mus-musculus GN-Seqh1 PE-2 SV-1                                                        | sp Q8R2640 40 kDa   | 0%   | (0.6) | unknown | 9       | 14 |    |
| 747 | TRUE | Empty | Serine threonine kinase receptor-associated protein OS-Mus-musculus GN-Sx2p PE-1 SV-1                     | sp Q8V5673 23 kDa   | 0%   | (0.6) | unknown | 9       | 15 |    |
| 748 | TRUE | Empty | Mannose-6-phosphate isomerase OS-Mus-musculus GN-Mpi1 PE-2 SV-1                                           | sp Q29AM4 47 kDa    | 0%   | (0.8) | unknown | 9       | 12 |    |
| 749 | TRUE | Empty | Uncharacterized protein C2orf35 homolog OS-Mus-musculus PE-2 SV-1                                         | sp Q090843 43 kDa   | 95%  | (0.4) | unknown | 7       | 19 |    |
| 750 | TRUE | Empty | Spermatogenesis-associated protein 19, mitochondrial OS-Mus-musculus GN-Spat19 PE-2 SV-1                  | sp Q50A02 18 kDa    | 0%   | (0.9) | unknown | 12      | 13 |    |
| 751 | TRUE | Empty | Serine threonine kinase receptor-associated protein OS-Mus-musculus GN-Strap PE-1 SV-2                    | sp Q02122 38 kDa    | 0%   | (1.6) | unknown | 14      | 9  |    |
| 752 | TRUE | Empty | Actin-like protein 6A OS-Mus-musculus GN-Act6a PE-1 SV-2                                                  | sp Q029M47 47 kDa   | 0%   | (0.9) | unknown | 12      | 13 |    |
| 753 | TRUE | Empty | Protein Wdr52 OS-Mus-musculus GN-Wdr52 PE-1 SV-1                                                          | tr E9Q5M6 212 kDa   | 95%  | (0.3) | unknown | 5       | 18 |    |
| 754 | TRUE | Empty | Hu2f0-interacting protein OS-Mus-musculus GN-Hi3 PE-2 SV-1                                                | tr F8W82 41 kDa     | 0%   | (0.9) | unknown | 11      | 12 |    |
| 755 | TRUE | Empty | MCG664 OS-Mus-musculus GN-Cy1 PE-4 SV-1                                                                   | sp Q39060 71 kDa    | 0%   | (1.1) | unknown | 9       | 8  |    |
| 756 | TRUE | Empty | Tubulin beta-6 chain OS-Mus-musculus GN-Tubb6 PE-1 SV-1                                                   | sp Q29T450 50 kDa   | TRUE | 0%    | (0.8)   | unknown | 9  | 19 |
| 757 | TRUE | Empty | Peptidyl-prolyl cis-trans isomerase G OS-Mus-musculus GN-Pp5 PE-1 SV-1                                    | sp A2A0288 28 kDa   | 0%   | (1.2) | unknown | 13      | 11 |    |
| 758 | TRUE | Empty | 14-3-3-delta/phi/gamma/epsilon/eta/theta/gamma/omega/psi subunit OS-Mus-musculus GN-Ddost PE-1 SV-2       | sp Q547348 48 kDa   | 0%   | (1.5) | unknown | 15      | 10 |    |
| 759 | TRUE | Empty | Microtubule-associated protein 4 OS-Mus-musculus GN-Mkap4 PE-1 SV-3                                       | sp P27546 117 kDa   | 0%   | (1.1) | unknown | 10      | 7  |    |
| 760 | TRUE | Empty | Aminoacyl tRNA synthase complex-interacting multifunctional protein 1 OS-Mus-musculus GN-Aamp1 PE-1 SV-2  | sp P31230 34 kDa    | 0%   | (1.5) | unknown | 12      | 8  |    |
| 761 | TRUE | Empty | Uncharacterized protein C11orf35 homolog OS-Mus-musculus PE-2 SV-1                                        | sp Q0VET574 24 kDa  | 95%  | (0.4) | unknown | 5       | 12 |    |
| 762 | TRUE | Empty | Nuclear pore glycoprotein p22 OS-Mus-musculus GN-Hngp2 PE-1 SV-2                                          | sp Q383053 22 kDa   | 0%   | (0.9) | unknown | 12      | 14 |    |
| 763 | TRUE | Empty | Eukaryotic 19B7 homolog OS-Mus-musculus GN-Pe11 PE-2 SV-2                                                 | sp Q6K64208 20 kDa  | 95%  | (0.3) | unknown | 4       | 12 |    |
| 764 | TRUE | Empty | Eukaryotic translation initiation factor 3 subunit B OS-Mus-musculus GN-EIf3b PE-1 SV-1                   | sp Q8ZQ9 91 kDa     | 0%   | (1.7) | unknown | 12      | 7  |    |
| 765 | TRUE | Empty | RNA binding motif protein, l1-linked-like-1 OS-Mus-musculus GN-Rbm1 PE-1 SV-1                             | sp Q3V1M14 42 kDa   | TRUE | 0%    | (0.6)   | unknown | 10 | 16 |
| 766 | TRUE | Empty | Histone H2A OS-Mus-musculus GN-H2A PE-1 SV-1                                                              | tr B1AY1 21 kDa     | TRUE | 0%    | (1.4)   | unknown | 17 | 12 |
| 767 | TRUE | Empty | RNA-binding protein MEX3D OS-Mus-musculus GN-Mex3d PE-2 SV-1                                              | tr E9PUA0 72 kDa    | 0%   | (1.0) | unknown | 13      | 13 |    |
| 768 | TRUE | Empty | Glutamine synthetase OS-Mus-musculus GN-Glu1 PE-1 SV-6                                                    | sp P15105 42 kDa    | 0%   | (0.5) | unknown | 8       | 15 |    |
| 769 | TRUE | Empty | Ras-related protein Rab-11B OS-Mus-musculus GN-Rab11b PE-1 SV-3                                           | sp Q46638 24 kDa    | 0%   | (0.9) | unknown | 9       | 10 |    |
| 770 | TRUE | Empty | Eukaryotic translation factor complex helicase XPB subunit OS-Mus-musculus GN-Erccl PE-2 SV-1             | sp Q49151 89 kDa    | 0%   | (1.0) | unknown | 9       | 11 |    |
| 771 | TRUE | Empty | 26S protease regulatory subunit 6B OS-Mus-musculus GN-Psm4 PE-1 SV-2                                      | sp P54775 47 kDa    | 0%   | (1.1) | unknown | 12      | 11 |    |
| 772 | TRUE | Empty | Alpha-centractin OS-Mus-musculus GN-Actr1a PE-2 SV-1                                                      | sp P61164 43 kDa    | 0%   | (1.0) | unknown | 11      | 11 |    |
| 773 | TRUE | Empty | Poly(U) binding-splicing factor Puf60 OS-Mus-musculus GN-Puf60 PE-2 SV-2                                  | sp Q2UE860 60 kDa   | 0%   | (0.7) | unknown | 11      | 15 |    |
| 774 | TRUE | Empty | Dorsal regulatory complex protein 1 OS-Mus-musculus GN-Drc1 PE-2 SV-1                                     | sp Q3U5589 24 kDa   | 0%   | (0.8) | unknown | 9       | 11 |    |
| 775 | TRUE | Empty | IQ domain-containing protein G OS-Mus-musculus GN-Ilgg PE-2 SV-1                                          | sp Q8W0Y 49 kDa     | 95%  | (2.0) | unknown | 10      | 5  |    |
| 776 | TRUE | Empty | Piw1-like protein 2 OS-Mus-musculus GN-Piw12 PE-1 SV-2                                                    | sp Q8C6Q 109 kDa    | 0%   | (1.7) | unknown | 12      | 7  |    |
| 777 | TRUE | Empty | Thd4 complex subunit 3 OS-Mus-musculus GN-Thoc3 PE-2 SV-1                                                 | sp Q8V8E39 39 kDa   | 95%  | (0.4) | unknown | 6       | 15 |    |
| 778 | TRUE | Empty | 7S ribonuclease endonuclease 7S kDa subunit, mitochondrial OS-Mus-musculus GN-Hndr1 PE-1 SV-2             | sp Q5V1080 80 kDa   | 0%   | (0.9) | unknown | 16      | 5  |    |
| 779 | TRUE | Empty | Coiled-coil domain-containing protein 11 OS-Mus-musculus GN-Cdc11 PE-2 SV-1                               | sp Q0A4562 62 kDa   | 0%   | (0.7) | unknown | 8       | 12 |    |
| 780 | TRUE | Empty | Kelch-like protein 10 OS-Mus-musculus GN-Klhl10 PE-1 SV-1                                                 | sp Q090Y169 69 kDa  | 0%   | (1.0) | unknown | 10      | 10 |    |
| 781 | TRUE | Empty | Cholesteryl ester-methyl cleavage enzyme, mitochondrial OS-Mus-musculus GN-Cys11a1 PE-2 SV-1              | sp Q5Q2600 60 kDa   | 0%   | (1.4) | unknown | 14      | 10 |    |
| 782 | TRUE | Empty | MCG12829 OS-Mus-musculus GN-Cm54 PE-4 SV-1                                                                | sp Q49779 13 kDa    | 0%   | (1.2) | unknown | 15      | 12 |    |
| 783 | TRUE | Empty | L-related protein 1 OS-Mus-musculus GN-Larp1 PE-1 SV-2                                                    | sp Q0Z6Q5 121 kDa   | 0%   | (1.0) | unknown | 5       | 5  |    |
| 784 | TRUE | Empty | Cytoskeleton-associated protein 5 OS-Mus-musculus GN-Cap5 PE-2 SV-1                                       | sp A2AG7226 26 kDa  | 0%   | (1.4) | unknown | 11      | 8  |    |
| 785 | TRUE | Empty | ADP/ATP translocase 1 OS-Mus-musculus GN-Slc24 PE-1 SV-4                                                  | sp P48862 33 kDa    | TRUE | 0%    | (1.1)   | unknown | 9  | 7  |
| 786 | TRUE | Empty | Intron1 subunit alpha-1 OS-Mus-musculus GN-Itxn1 PE-2 SV-1                                                | sp Q225158 28 kDa   | 0%   | (0.8) | unknown | 11      | 14 |    |
| 787 | TRUE | Empty | Camitine O-palmitoyltransferase 2, mitochondrial OS-Mus-musculus GN-Cpt2 PE-1 SV-2                        | sp P52825 74 kDa    | 0%   | (0.8) | unknown | 9       | 11 |    |
| 788 | TRUE | Empty | RISC-loading complex subunit TARBP2 OS-Mus-musculus GN-Tarbp2 PE-1 SV-2                                   | sp P97474 39 kDa    | 0%   | (1.1) | unknown | 8       | 7  |    |
| 789 | TRUE | Empty | R3H domain-containing protein 3 OS-Mus-musculus GN-R3h3 PE-1 SV-1                                         | sp Q47C251 25 kDa   | 0%   | (0.7) | unknown | 14      | 14 |    |
| 790 | TRUE | Empty | UPF0468 protein C16orf80 homolog OS-Mus-musculus GN-Gf3 PE-2 SV-1                                         | sp Q8TU123 23 kDa   | 0%   | (0.6) | unknown | 8       | 14 |    |
| 791 | TRUE | Empty | Coiled-coil domain-containing protein 159 OS-Mus-musculus GN-Cdc159 PE-2 SV-1                             | sp Q8C96346 46 kDa  | 0%   | (0.7) | unknown | 11      | 15 |    |
| 792 | TRUE | Empty | Coiled-coil domain-containing protein 65 OS-Mus-musculus GN-Cdc65 PE-2 SV-1                               | sp Q8VH7 58 kDa     | 95%  | (0.4) | unknown | 3       | 7  |    |
| 793 | TRUE | Empty | Deletion factor, protein- and glutamine-rich OS-Mus-musculus GN-Dfg PE-1 SV-1                             | sp Q3U5589 24 kDa   | 0%   | (1.1) | unknown | 17      | 12 |    |
| 794 | TRUE | Empty | DnaJ homolog subfamily C member 10 OS-Mus-musculus GN-Dnaj10 PE-1 SV-1                                    | sp Q0C2191 21 kDa   | 0%   | (0.8) | unknown | 11      | 13 |    |
| 795 | TRUE | Empty | Proteasome subunit alpha type-6 OS-Mus-musculus GN-Psm6 PE-1 SV-1                                         | sp Q09UW27 27 kDa   | 0%   | (0.6) | unknown | 10      | 16 |    |
| 796 | TRUE | Empty | Acy1-coenzyme A thioesterase 9, mitochondrial OS-Mus-musculus GN-Aco9 PE-1 SV-1                           | sp Q8R0451 41 kDa   | 0%   | (1.4) | unknown | 13      | 9  |    |
| 797 | TRUE | Empty | Protein Wdr63 OS-Mus-musculus GN-Wdr63 PE-1 SV-1                                                          | tr B1AY1 21 kDa     | TRUE | 0%    | (1.5)   | unknown | 16 | 5  |
| 798 | TRUE | Empty | MCG659, isoform CRA_b OS-Mus-musculus GN-Tx2d4 PE-4 SV-1                                                  | tr D126V5 25 kDa    | 0%   | (1.2) | unknown | 15      | 13 |    |
| 799 | TRUE | Empty | Protein Adam3 OS-Mus-musculus GN-Adam3 PE-4 SV-1                                                          | tr F8VQ03 91 kDa    | 95%  | (0.3) | unknown | 5       | 16 |    |
| 800 | TRUE | Empty | AP-1 complex subunit mt-1 OS-Mus-musculus GN-Ap1m1 PE-1 SV-3                                              | sp P55585 49 kDa    | 0%   | (1.5) | unknown | 6       | 4  |    |
| 801 | TRUE | Empty | 170000119k protein OS-Mus-musculus GN-Fer209 PE-2 SV-1                                                    | sp A2A945 20 kDa    | 0%   | (0.9) | unknown | 13      | 15 |    |
| 802 | TRUE | Empty | Heterogeneous nuclear ribonucleoprotein A/B OS-Mus-musculus GN-Hnmpab PE-1 SV-1                           | sp Q090203 31 kDa   | TRUE | 95%   | (0.0)   | unknown | 0  | 27 |
| 803 | TRUE | Empty | Band 4.1-like protein 2 OS-Mus-musculus GN-Epb412 PE-1 SV-2                                               | sp Q370318 110 kDa  | TRUE | 0%    | (0.9)   | unknown | 9  | 9  |
| 804 | TRUE | Empty | Gelsolin OS-Mus-musculus GN-Gsn PE-1 SV-3                                                                 | sp P13022 86 kDa    | 0%   | (0.9) | unknown | 9       | 10 |    |
| 805 | TRUE | Empty | Nucleoporin Nup43 OS-Mus-musculus GN-Nup43 PE-2 SV-2                                                      | sp Q39252 42 kDa    | 0%   | (0.8) | unknown | 6       | 11 |    |
| 806 | TRUE | Empty | Mortality factor 4-like protein 1 OS-Mus-musculus GN-Mor41 PE-2 SV-2                                      | sp P60762 41 kDa    | 0%   | (0.7) | unknown | 8       | 12 |    |
| 807 | TRUE | Empty | ADP-ribosylation factor 3 OS-Mus-musculus GN-Arf3 PE-2 SV-1                                               | sp P61205 21 kDa    | TRUE | 0%    | (1.1)   | unknown | 12 | 11 |
| 808 | TRUE | Empty | Proteasome subunit beta type-4 OS-Mus-musculus GN-Psm4 PE-1 SV-1                                          | sp P09020 29 kDa    | 0%   | (0.7) | unknown | 8       | 11 |    |
| 809 | TRUE | Empty | Dynein heavy chain 12, axonemal OS-Mus-musculus GN-Dnah12 PE-1 SV-2                                       | sp Q3VQ00 356 kDa   | TRUE | 0%    | (0.6)   | unknown | 6  | 10 |
| 810 | TRUE | Empty | Rho guanine nucleotide exchange factor 2 OS-Mus-musculus GN-Arhgef2 PE-1 SV-4                             | sp Q60875 112 kDa   | 0%   | (0.9) | unknown | 9       | 10 |    |
| 811 | TRUE | Empty | Chromobol protein homolog 5 OS-Mus-musculus GN-Cbc5 PE-1 SV-3                                             | sp Q6168622 22 kDa  | TRUE | 0%    | (1.1)   | unknown | 10 | 10 |
| 812 | TRUE | Empty | Serine/threonine-protein kinase 16 OS-Mus-musculus GN-Sk16 PE-1 SV-3                                      | sp Q60201 144 kDa   | 0%   | (1.1) | unknown | 10      | 9  |    |
| 813 | TRUE | Empty | Coiled-coil domain-containing protein 116 OS-Mus-musculus GN-Cdc116 PE-2 SV-1                             | sp Q8X03160 30 kDa  | 0%   | (0.8) | unknown | 10      | 13 |    |
| 814 | TRUE | Empty | Coiled-coil domain-containing protein 104 OS-Mus-musculus GN-Cdc104 PE-2 SV-1                             | sp Q8C6E040 40 kDa  | 95%  | (2.5) | unknown | 10      | 4  |    |
| 815 | TRUE | Empty | Succinate dehydrogenase [ubiquinone] non-sulfur subunit, mitochondrial OS-Mus-musculus GN-Hsdhb PE-1 SV-1 | sp Q3C0CA 32 kDa    | 0%   | (1.7) | unknown | 12      | 7  |    |
| 816 | TRUE | Empty | Histone H2B family class 1 OS-Mus-musculus GN-H2b1 PE-1 SV-3                                              | tr B1AY1 21 kDa     | 0%   | (1.7) | unknown | 17      | 12 |    |
| 817 | TRUE | Empty | Coiled-coil domain-containing protein 81 OS-Mus-musculus GN-Cdc81 PE-2 SV-1                               | sp Q905W 76 kDa     | 95%  | (0.3) | unknown | 4       | 13 |    |
| 818 | TRUE | Empty | ATP synthase subunit d, mitochondrial OS-Mus-musculus GN-Atp5d PE-1 SV-3                                  | sp Q9DC19 9 kDa     | 0%   | (1.6) | unknown | 16      | 10 |    |
| 819 | TRUE | Empty | Tyrosine-protein kinase BA21B OS-Mus-musculus GN-Bat2b PE-1 SV-2                                          | sp Q5Z77 17 kDa     | 0%   | (0.3) | unknown | 4       | 12 |    |
| 820 | TRUE | Empty | Tyrosine kinase 13 OS-Mus-musculus GN-Eck3 PE-2 SV-1                                                      | sp Q3V191 80 kDa    | 0%   | (1.1) | unknown | 10      | 11 |    |
| 821 | TRUE | Empty | Heat shock 70 kDa protein 4 OS-Mus-musculus GN-Hsp4 PE-2 SV-1                                             | tr Q1U2 294 kDa     | TRUE | 0%    | (1.1)   | unknown | 11 | 9  |
| 822 | TRUE | Empty | BMS1 homolog, ribosome assembly protein (Yeast) OS-Mus-musculus GN-Bms1 PE-2 SV-1                         | tr Q6P75 145 kDa    | 0%   | (0.8) | unknown | 8       | 10 |    |
| 823 | TRUE | Empty | Testis-expressed sequence 37 protein OS-Mus-musculus GN-Tes37 PE-2 SV-1                                   | sp Q50A0 21 kDa     | 95%  | (0.3) | unknown | 3       | 9  |    |
| 824 | TRUE | Empty | Single-strand DNA-binding protein OS-Mus-musculus GN-Ssb1 PE-2 SV-1                                       | sp Q8R262 17 kDa    | 0%   | (0.4) | unknown | 14      | 6  |    |
| 825 | TRUE | Empty | SRK kinase-signaling inhibitor 1 OS-Mus-musculus GN-Srcin1 PE-2 SV-1                                      | tr B1AQZ9 131 kDa   | 95%  | (0.2) | unknown | 3       | 13 |    |
| 826 | TRUE | Empty | Heterogeneous nuclear ribonucleoprotein A/B OS-Mus-musculus GN-Hnmpab PE-2 SV-1                           | tr Q20B00 36 kDa    | TRUE | 95%   | (INF)   | unknown | 24 | 0  |
| 827 | TRUE | Empty | Probable histidine acetyltransferase OS-Mus-musculus GN-Hat PE-2 SV-1                                     | sp A2A2C329 29 kDa  | TRUE | 95%   | (0.4)   | unknown | 4  | 10 |
| 828 | TRUE | Empty | Proteasome subunit beta type-1 OS-Mus-musculus GN-Psm1 PE-1 SV-1                                          | sp Q09061 26 kDa    | 0%   | (0.9) | unknown | 8       | 13 |    |
| 829 | TRUE | Empty | Leucine-rich repeat-containing protein 23 OS-Mus-musculus GN-Lrrc23 PE-2 SV-1                             | sp Q512539 39 kDa   | TRUE | 95%   | (0.5)   | unknown | 5  | 11 |
| 830 | TRUE | Empty | Testis-specific serine/threonine protein kinase 2 OS-Mus-musculus GN-Tsk2 PE-1 SV-2                       | sp Q54834 31 kDa    | TRUE | 0%    | (0.7)   | unknown | 9  | 10 |
| 831 | TRUE | Empty | Hydroxymethylglutaryl-CoA synthase, mitochondrial OS-Mus-musculus GN-Hmgsl2 PE-1 SV-2                     | sp P58857 57 kDa    | 0%   | (1.8) | unknown | 11      | 5  |    |
| 832 | TRUE | Empty | Guanine nucleotide-binding protein (G12/G13/G17) subunit beta-2 OS-Mus-musculus GN-Gnb2 PE-1 SV-3         | sp P82889 37 kDa    | TRUE | 0%    | (0.9)   | unknown | 7  | 14 |
| 833 | TRUE | Empty | Protein FAM58A OS-Mus-musculus GN-Fam58a PE-2 SV-1                                                        | sp Q3T726 55 kDa    | TRUE | 0%    | (1.0)   | unknown | 11 | 11 |
| 834 | TRUE | Empty | Serine/threonine-protein kinase TAO1 OS-Mus-musculus GN-Taok1 PE-1 SV-1                                   | sp Q5F268 116 kDa   | 0%   | (0.5) | unknown | 5       | 11 |    |
| 835 | TRUE | Empty | Testis-specific serine/threonine-protein kinase 1 OS-Mus-musculus GN-Tsk1 PE-1 SV-2                       | sp Q5E124 42 kDa    | TRUE | 0%    | (1.9)   | unknown | 7  | 9  |
| 836 | TRUE | Empty | 5-ascorbate-induced protein 1 OS-Mus-musculus GN-Azi1 PE-1 SV-2                                           | sp Q6265120 20 kDa  | 95%  | (0.5) | unknown | 7       | 15 |    |
| 837 | TRUE | Empty | PWWP domain-containing protein MUM1 OS-Mus-musculus GN-Mum1 PE-2 SV-1                                     | sp Q6D105 76 kDa    | 0%   | (0.6) | unknown | 8       | 14 |    |
| 838 | TRUE | Empty | Centrosomal protein of 135 kDa OS-Mus-musculus GN-Cep135 PE-1 SV-1                                        | sp Q8P504 133 kDa   | 95%  | (0.5) | unknown | 6       | 12 |    |
| 839 | TRUE | Empty | 26S protease regulatory subunit 11 OS-M                                                                   |                     |      |       |         |         |    |    |

|     |      |       |                                                                                                       |                   |           |            |         |         |    |   |
|-----|------|-------|-------------------------------------------------------------------------------------------------------|-------------------|-----------|------------|---------|---------|----|---|
| 879 | TRUE | Empty | Protein Tcifs OS-Mus musculus GN-Tcifs PE-2 SV-1                                                      | tr Q32N98.52.kda  | 95% (0.5) | unknown    | 4       | 8       |    |   |
| 880 | TRUE | Empty | T-complex protein 1 subunit zeta-2 OS-Mus musculus GN-Ctcb2 PE-2 SV-4                                 | sp Q61390.58.kda  | TRUE      | 0% (0.8)   | unknown | 5       | 7  |   |
| 881 | TRUE | Empty | Histone deacetylase 1 OS-Mus musculus GN-Hdac1 PE-1 SV-1                                              | sp Q20R55.55.kda  | TRUE      | 0% (0.8)   | unknown | 11      | 11 |   |
| 882 | TRUE | Empty | Activated RNA polymerase II transcriptional coactivator p15 OS-Mus musculus GN-Sub1 PE-1 SV-3         | sp P11031.14.kda  | 0%        | (0.7)      | unknown | 7       | 10 |   |
| 883 | TRUE | Empty | Unconventional myosin-1b OS-Mus musculus GN-Myo1b PE-2 SV-3                                           | sp P46735.129.kda | 0%        | (0.6)      | unknown | 7       | 12 |   |
| 884 | TRUE | Empty | G-phosphofruktase, muscle type OS-Mus musculus GN-Pfkm PE-1 SV-3                                      | sp P47575.85.kda  | TRUE      | 0% (0.8)   | unknown | 6       | 9  |   |
| 885 | TRUE | Empty | Cal-1 nucleolar RNA binding protein OS-Mus musculus GN-Crbp PE-1 SV-1                                 | sp P6824.19.kda   | 0%        | (1.0)      | unknown | 10      | 10 |   |
| 886 | TRUE | Empty | Secreted frizzled-related protein 3 OS-Mus musculus GN-Frzb PE-1 SV-1                                 | sp P97401.36.kda  | 0%        | (0.8)      | unknown | 9       | 11 |   |
| 887 | TRUE | Empty | Ubiquitin-like modifier-activating enzyme 1 OS-Mus musculus GN-Ublat1 PE-1 SV-1                       | sp Q02093.318.kda | TRUE      | 0% (0.9)   | unknown | 8       | 9  |   |
| 888 | TRUE | Empty | Spermin OS-Mus musculus GN-Spm1 PE-1 SV-1                                                             | sp Q1488551.kda   | TRUE      | 0% (0.8)   | unknown | 8       | 15 |   |
| 889 | TRUE | Empty | Coiled-coil domain-containing protein 27 OS-Mus musculus GN-Cc27 PE-2 SV-1                            | sp V303674.kda    | 0%        | (0.5)      | unknown | 6       | 12 |   |
| 890 | TRUE | Empty | Cancer susceptibility candidate protein 1 OS-Mus musculus GN-Casc1 PE-2 SV-1                          | sp Q6TDU85.8.kda  | 0%        | (0.6)      | unknown | 5       | 9  |   |
| 891 | TRUE | Empty | Protein DEK OS-Mus musculus GN-DeK PE-1 SV-1                                                          | sp Q27M443.kda    | 0%        | (0.8)      | unknown | 9       | 11 |   |
| 892 | TRUE | Empty | Sorting and assembly machinery component 50 homolog OS-Mus musculus GN-Samm50 PE-1 SV-1               | sp Q88R52.52.kda  | 0%        | (0.8)      | unknown | 5       | 6  |   |
| 893 | TRUE | Empty | Protein dpy-30 homolog OS-Mus musculus GN-Dpy30 PE-1 SV-1                                             | sp Q9N110.11.kda  | 0%        | (0.8)      | unknown | 9       | 12 |   |
| 894 | TRUE | Empty | Nucleoporin Nup37 OS-Mus musculus GN-Nup37 PE-2 SV-2                                                  | sp Q9CWU37.kda    | 0%        | (0.5)      | unknown | 5       | 10 |   |
| 895 | TRUE | Empty | Mitochondrial pyruvate carrier 2 OS-Mus musculus GN-Mpc2 PE-1 SV-1                                    | sp Q9B02314.kda   | 0%        | (1.0)      | unknown | 5       | 5  |   |
| 896 | TRUE | Empty | AP-3 complex subunit mu1 OS-Mus musculus GN-Ap3mu1 PE-1 SV-1                                          | sp Q98K28.47.kda  | 0%        | (1.8)      | unknown | 7       | 4  |   |
| 897 | TRUE | Empty | Phenylalanine-tRNA ligase beta subunit OS-Mus musculus GN-Far3b PE-2 SV-2                             | sp Q9JWL46.kda    | 0%        | (0.9)      | unknown | 8       | 9  |   |
| 898 | TRUE | Empty | ADP-ribosylation factor-like protein 3 OS-Mus musculus GN-Arf3 PE-1 SV-1                              | sp Q9WUL20.kda    | 0%        | (1.2)      | unknown | 10      | 8  |   |
| 899 | TRUE | Empty | Predicted gene, EG236749 OS-Mus musculus GN-GM907 PE-2 SV-1                                           | tr B1A899.47.kda  | TRUE      | 0% (1.0)   | unknown | 7       | 7  |   |
| 900 | TRUE | Empty | MCG1326, isoform CRA_b OS-Mus musculus GN-Hmnp31 PE-4 SV-1                                            | tr Q3WV7125.kda   | 0%        | (0.7)      | unknown | 7       | 10 |   |
| 901 | TRUE | Empty | Protein A80 (Fragment) OS-Mus musculus GN-A80 PE-4 SV-1                                               | tr J3UUV4158.kda  | 0%        | (0.6)      | unknown | 5       | 8  |   |
| 902 | TRUE | Empty | Zinc finger protein 541 OS-Mus musculus GN-Znf541 PE-1 SV-1                                           | sp Q0GGC148.kda   | 0%        | (0.4)      | unknown | 4       | 10 |   |
| 903 | TRUE | Empty | Centrosomal protein of 128 kDa OS-Mus musculus GN-Cep128 PE-2 SV-2                                    | sp Q8802.129.kda  | 0%        | (0.4)      | unknown | 2       | 5  |   |
| 904 | TRUE | Empty | Septin 2 OS-Mus musculus GN-Sept2 PE-1 SV-2                                                           | sp P42269.42.kda  | TRUE      | 95% (0.0)  | unknown | 0       | 23 |   |
| 905 | TRUE | Empty | 26S proteasome non-ATPase regulatory subunit 4 OS-Mus musculus GN-Psm4 PE-1 SV-1                      | sp Q35226.41.kda  | 0%        | (0.8)      | unknown | 8       | 10 |   |
| 906 | TRUE | Empty | Glycylglycine N-tetradecanoyltransferase 2 OS-Mus musculus GN-Ntm2 PE-1 SV-1                          | sp Q7031160.kda   | TRUE      | 0% (1.1)   | unknown | 11      | 10 |   |
| 907 | TRUE | Empty | Palmitoyl transferase 1 OS-Mus musculus GN-Ppt1 PE-2 SV-2                                             | sp Q885124.kda    | 0%        | (1.9)      | unknown | 13      | 7  |   |
| 908 | TRUE | Empty | Signal recognition particle 9 kDa protein OS-Mus musculus GN-Srp9 PE-1 SV-2                           | sp P4962.13.kda   | 0%        | (1.3)      | unknown | 7       | 9  |   |
| 909 | TRUE | Empty | Pre-mRNA branch site protein p14 OS-Mus musculus GN-F3B14 PE-2 SV-1                                   | sp P59708.15.kda  | 0%        | (0.8)      | unknown | 9       | 11 |   |
| 910 | TRUE | Empty | 26S proteasome regulatory subunit 10B OS-Mus musculus GN-Psm10B PE-1 SV-1                             | sp P62334.44.kda  | 0%        | (0.9)      | unknown | 8       | 9  |   |
| 911 | TRUE | Empty | Serine/arginine-rich splicing factor 2 OS-Mus musculus GN-Srsf2 PE-1 SV-4                             | sp Q6280235.kda   | 0%        | (1.2)      | unknown | 13      | 11 |   |
| 912 | TRUE | Empty | Nucleosome assembly protein 1-like 4 OS-Mus musculus GN-Nap1L4 PE-1 SV-1                              | sp Q7824743.kda   | TRUE      | 0% (1.0)   | unknown | 11      | 10 |   |
| 913 | TRUE | Empty | Uncharacterized protein C9orf9 homolog OS-Mus musculus PE-1 SV-1                                      | sp Q77PM.19.kda   | 0%        | (1.1)      | unknown | 12      | 11 |   |
| 914 | TRUE | Empty | Aprataxin OS-Mus musculus GN-Apta PE-2 SV-2                                                           | sp Q27QC39.kda    | 0%        | (1.0)      | unknown | 9       | 9  |   |
| 915 | TRUE | Empty | Coiled-coil domain-containing protein 181 OS-Mus musculus GN-Ccdc181 PE-2 SV-1                        | sp Q8602359.kda   | 0%        | (0.8)      | unknown | 8       | 10 |   |
| 916 | TRUE | Empty | Proteasome inhibitor P131 subunit OS-Mus musculus GN-Pim1 PE-1 SV-1                                   | sp Q8BM430.kda    | 0%        | (0.7)      | unknown | 13      | 10 |   |
| 917 | TRUE | Empty | Coronin-2A OS-Mus musculus GN-Cor2a PE-2 SV-1                                                         | sp Q9CP0560.kda   | 0%        | (0.9)      | unknown | 8       | 9  |   |
| 918 | TRUE | Empty | Transcription elongation regulator 1 OS-Mus musculus GN-Terrg1 PE-1 SV-2                              | sp Q8C9F122.kda   | 0%        | (0.6)      | unknown | 3       | 5  |   |
| 919 | TRUE | Empty | Nucleolar GTP-binding protein 1 OS-Mus musculus GN-Gtubp1 PE-2 SV-3                                   | sp Q9P94.74.kda   | 0%        | (1.8)      | unknown | 7       | 4  |   |
| 920 | TRUE | Empty | RIB43A-like with coiled-coils protein 1 OS-Mus musculus GN-Rbc1 PE-2 SV-1                             | sp Q9O0B45.kda    | 0%        | (0.7)      | unknown | 8       | 11 |   |
| 921 | TRUE | Empty | Testicular haploid expressed gene protein-like OS-Mus musculus GN-Thegl PE-2 SV-1                     | sp Q9DA152.kda    | 0%        | (1.2)      | unknown | 10      | 8  |   |
| 922 | TRUE | Empty | Protein Rtr1 OS-Mus musculus GN-Rtr1 PE-2 SV-1                                                        | tr E9W2842.kda    | TRUE      | 95% (0.5)  | unknown | 6       | 13 |   |
| 923 | TRUE | Empty | Protein Spaz1/let1 OS-Mus musculus GN-Spaz1/let1 PE-4 SV-1                                            | tr E9Q435.145.kda | TRUE      | 0%         | (0.6)   | unknown | 10 | 7 |
| 924 | TRUE | Empty | Protein Fam1742 OS-Mus musculus GN-Fam1742 PE-4 SV-1                                                  | tr L7N2E5.84.kda  | 0%        | (1.4)      | unknown | 10      | 7  |   |
| 925 | TRUE | Empty | E3 ubiquitin-protein ligase UBRA4 OS-Mus musculus GN-Ubra4 PE-1 SV-1                                  | sp A2AN0572.kda   | 0%        | (1.3)      | unknown | 4       | 3  |   |
| 926 | TRUE | Empty | Eukaryotic translation initiation factor 4E OS-Mus musculus GN-EIf4e PE-1 SV-1                        | sp P63073.25.kda  | 0%        | (0.4)      | unknown | 3       | 7  |   |
| 927 | TRUE | Empty | 60S ribosomal protein L35 OS-Mus musculus GN-Rpl35 PE-2 SV-1                                          | sp Q92N9.15.kda   | 0%        | (1.5)      | unknown | 9       | 5  |   |
| 928 | TRUE | Empty | SARF-like transcription modulator OS-Mus musculus GN-Stm PE-1 SV-1                                    | sp Q8OHC2117.kda  | 0%        | (0.1)      | unknown | 1       | 7  |   |
| 929 | TRUE | Empty | Enhancer of yellow 2 transcription factor homolog OS-Mus musculus GN-Emy2 PE-2 SV-1                   | sp Q8XJ0.12.kda   | 0%        | (0.9)      | unknown | 7       | 8  |   |
| 930 | TRUE | Empty | 60S ribosomal protein L28 OS-Mus musculus GN-Rpl28 PE-1 SV-2                                          | sp P41105.16.kda  | 0%        | (1.7)      | unknown | 5       | 3  |   |
| 931 | TRUE | Empty | Osteonin subunit alpha type 1 OS-Mus musculus GN-Osm1 PE-1 SV-1                                       | sp Q9R10.40.kda   | 0%        | (0.4)      | unknown | 3       | 7  |   |
| 932 | TRUE | Empty | 60S ribosomal protein L34 OS-Mus musculus GN-Rpl34 PE-3 SV-2                                          | sp Q9D1813.kda    | 0%        | (1.0)      | unknown | 5       | 5  |   |
| 933 | TRUE | Empty | Glutathione S-transferase Mu 1 OS-Mus musculus GN-Gstm1 PE-1 SV-2                                     | sp P10649.26.kda  | TRUE      | 95% (5.2)  | unknown | 14      | 2  |   |
| 934 | TRUE | Empty | Plain OS-Mus musculus GN-Pln PE-1 SV-4                                                                | sp P3569182.kda   | TRUE      | 95% (0.97) | unknown | 18      | 0  |   |
| 935 | TRUE | Empty | THO complex subunit 4 OS-Mus musculus GN-Ayref PE-1 SV-3                                              | sp Q8858327.kda   | 0%        | (0.9)      | unknown | 9       | 9  |   |
| 936 | TRUE | Empty | Eukaryotic translation initiation factor 3 subunit D OS-Mus musculus GN-EIf3d PE-1 SV-2               | sp Q7019464.kda   | 0%        | (1.4)      | unknown | 10      | 7  |   |
| 937 | TRUE | Empty | Cytochrome c oxidase subunit 2 OS-Mus musculus GN-Mtco2 PE-1 SV-1                                     | sp P04045.26.kda  | 0%        | (1.4)      | unknown | 10      | 7  |   |
| 938 | TRUE | Empty | Ubiquitin carboxyl-terminal hydrolase 4 OS-Mus musculus GN-Ubr4 PE-1 SV-3                             | sp P51213108.kda  | TRUE      | 0% (1.8)   | unknown | 7       | 9  |   |
| 939 | TRUE | Empty | WD repeat-containing protein 5 OS-Mus musculus GN-Wdr5 PE-1 SV-1                                      | sp P51665.37.kda  | 0%        | (1.0)      | unknown | 6       | 6  |   |
| 940 | TRUE | Empty | Transcription elongation factor B polypeptide 1 OS-Mus musculus GN-Teef1 PE-1 SV-1                    | sp P83940.12.kda  | 0%        | (0.7)      | unknown | 7       | 10 |   |
| 941 | TRUE | Empty | 26S proteasome non-ATPase regulatory subunit 1 OS-Mus musculus GN-Psm1 PE-1 SV-1                      | sp Q237K7106.kda  | 0%        | (1.2)      | unknown | 10      | 8  |   |
| 942 | TRUE | Empty | Core histone repeat protein 1 OS-Mus musculus GN-Hsrml PE-1 SV-2                                      | sp Q52K63.107.kda | 0%        | (1.3)      | unknown | 10      | 7  |   |
| 943 | TRUE | Empty | THO complex subunit 6 homolog OS-Mus musculus GN-Thoc6 PE-2 SV-1                                      | sp Q5U4D37.kda    | 0%        | (1.0)      | unknown | 5       | 5  |   |
| 944 | TRUE | Empty | Rab GDP dissociation inhibitor beta OS-Mus musculus GN-Gdi2 PE-1 SV-1                                 | sp Q6159851.kda   | 0%        | (1.2)      | unknown | 6       | 5  |   |
| 945 | TRUE | Empty | Probable global transcription activator SMN2L1 OS-Mus musculus GN-Smar2a PE-1 SV-1                    | sp Q6DQC180.kda   | TRUE      | 0% (1.0)   | unknown | 6       | 6  |   |
| 946 | TRUE | Empty | Nucleolar dyx1c1 intermediate chain 2 OS-Mus musculus GN-Dync1ic2 PE-1 SV-2                           | sp Q9P912.15.kda  | 0%        | (0.9)      | unknown | 7       | 7  |   |
| 947 | TRUE | Empty | Calcium/calmodulin-dependent protein kinase type II subunit delta OS-Mus musculus GN-Camk2d PE-1 SV-1 | sp Q9P4256.kda    | TRUE      | 95% (0.5)  | unknown | 5       | 8  |   |
| 948 | TRUE | Empty | Protein MAATS1 OS-Mus musculus GN-Maats1 PE-2 SV-3                                                    | sp Q8BRC92.kda    | 0%        | (0.7)      | unknown | 6       | 9  |   |
| 949 | TRUE | Empty | Cytosolic acyl coenzyme A thioester hydrolase OS-Mus musculus GN-Aco7 PE-1 SV-2                       | sp Q91V1243.kda   | 0%        | (1.0)      | unknown | 7       | 7  |   |
| 950 | TRUE | Empty | MARCKS-related interacting nuclear phosphoprotein OS-Mus musculus GN-Mnr67b PE-2 SV-1                 | sp Q92V1243.kda   | 0%        | (1.0)      | unknown | 9       | 12 |   |
| 951 | TRUE | Empty | Structural maintenance of chromosomes protein 18 OS-Mus musculus GN-Smc1b PE-1 SV-1                   | sp Q920F6145.kda  | 0%        | (0.6)      | unknown | 5       | 9  |   |
| 952 | TRUE | Empty | Structural maintenance of chromosomes protein 6 OS-Mus musculus GN-Smc6 PE-2 SV-1                     | sp Q924W.127.kda  | 0%        | (0.7)      | unknown | 5       | 7  |   |
| 953 | TRUE | Empty | Ankyrin repeat and EF-hand domain-containing protein 1 OS-Mus musculus GN-Ankrf1 PE-2 SV-1            | sp Q920J787.kda   | 0%        | (0.3)      | unknown | 3       | 11 |   |
| 954 | TRUE | Empty | Uncharacterized protein C1orf154 homolog OS-Mus musculus PE-2 SV-3                                    | sp Q92K6159.kda   | 0%        | (1.1)      | unknown | 8       | 7  |   |
| 955 | TRUE | Empty | Dnaj homolog subfamily B member 1 OS-Mus musculus GN-Dnajb1 PE-2 SV-3                                 | sp Q9QY138.kda    | TRUE      | 0% (1.1)   | unknown | 8       | 7  |   |
| 956 | TRUE | Empty | Metastasis-associated protein MTA2 OS-Mus musculus GN-Mta2 PE-1 SV-1                                  | tr D91R975.kda    | TRUE      | 0% (1.1)   | unknown | 8       | 7  |   |
| 957 | TRUE | Empty | Receptor expression-enhancing protein 6 OS-Mus musculus GN-Reep6 PE-1 SV-1                            | tr D91R781.63.kda | 0%        | (0.6)      | unknown | 6       | 10 |   |
| 958 | TRUE | Empty | Protein Tc18 OS-Mus musculus GN-Tc18 PE-2 SV-2                                                        | tr D2WV.129.kda   | 0%        | (0.7)      | unknown | 3       | 8  |   |
| 959 | TRUE | Empty | Protein Sfr11 OS-Mus musculus GN-Sfr11 PE-2 SV-1                                                      | tr E9Q6E5.57.kda  | 0%        | (0.8)      | unknown | 7       | 9  |   |
| 960 | TRUE | Empty | MCG12846 OS-Mus musculus GN-Sipal13B PE-4 SV-1                                                        | tr Q9X91.195.kda  | 0%        | (0.9)      | unknown | 8       | 9  |   |
| 961 | TRUE | Empty | Protein 493422H20R8 OS-Mus musculus GN-493422H20R8 PE-2 SV-1                                          | tr Q30W6.71.kda   | 0%        | (0.5)      | unknown | 7       | 13 |   |
| 962 | TRUE | Empty | Protein Gms597 OS-Mus musculus GN-Gms597 PE-4 SV-1                                                    | tr E9Q8E5.100.kda | 0%        | (0.8)      | unknown | 6       | 8  |   |
| 963 | TRUE | Empty | Hyaluronan mediated motility receptor OS-Mus musculus GN-Hmmr PE-1 SV-4                               | sp Q0054792.kda   | 0%        | (0.5)      | unknown | 3       | 6  |   |
| 964 | TRUE | Empty | Plectradin homolog domain-containing family A member 7 OS-Mus musculus GN-Plekha7 PE-1 SV-2           | sp Q3JUL6.127.kda | 0%        | (0.3)      | unknown | 3       | 9  |   |
| 965 | TRUE | Empty | Histone deacetylase complex subunit SARF8 OS-Mus musculus GN-GM10094 PE-4 SV-1                        | tr E9Q213.203.kda | 0%        | (0.3)      | unknown | 4       | 13 |   |
| 966 | TRUE | Empty | Heat shock protein beta 9 OS-Mus musculus GN-Hsp90b PE-1 SV-1                                         | sp Q3JUL6.127.kda | 0%        | (0.3)      | unknown | 4       | 13 |   |
| 967 | TRUE | Empty | Hydrocephalus-inducing protein OS-Mus musculus GN-Hydn PE-2 SV-2                                      | sp Q80W9.582.kda  | 0%        | (0.0)      | unknown | 0       | 8  |   |
| 968 | TRUE | Empty | Nucleolar transcription factor 1 OS-Mus musculus GN-Ubr1 PE-4 SV-1                                    | tr AZAW788.kda    | TRUE      | 95% (0.0)  | unknown | 0       | 13 |   |
| 969 | TRUE | Empty | Death domain-associated protein 6 OS-Mus musculus GN-Ddap PE-1 SV-1                                   | sp Q3561393.kda   | 0%        | (1.6)      | unknown | 5       | 9  |   |
| 970 | TRUE | Empty | Centrin-1 OS-Mus musculus GN-Cent1 PE-1 SV-1                                                          | sp J41209.20.kda  | 0%        | (0.5)      | unknown | 5       | 10 |   |
| 971 | TRUE | Empty | Protein phosphatase 1 regulatory subunit 7 OS-Mus musculus GN-Ppp1r7 PE-1 SV-2                        | sp Q3UM441.kda    | 0%        | (0.8)      | unknown | 9       | 12 |   |
| 972 | TRUE | Empty | Dointegrin and metalloproteinase domain-containing protein 2 OS-Mus musculus GN-Adam2 PE-2 SV-2       | sp Q6071882.kda   | 0%        | (0.9)      | unknown | 7       | 8  |   |
| 973 | TRUE | Empty | EF-hand domain-containing protein 3 OS-Mus musculus GN-Efca3 PE-2 SV-1                                | sp Q921X37.37.kda | 0%        | (0.9)      | unknown | 9       | 10 |   |
| 974 | TRUE | Empty | Pfklp1-prolyl cis-trans isomerase FKBP5 OS-Mus musculus GN-Fkbp6 PE-2 SV-1                            | sp Q91XW.37.kda   | 0%        | (0.9)      | unknown | 9       | 10 |   |
| 975 | TRUE | Empty | Dnaj homolog subfamily A member 3, mitochondrial OS-Mus musculus GN-Dnaj3 PE-1 SV-1                   | sp Q99M8.52.kda   | 0%        | (0.8)      | unknown | 6       | 8  |   |
| 976 | TRUE | Empty | Mitochondrial import receptor subunit TOM34 OS-Mus musculus GN-Tom34 PE-2 SV-1                        | sp Q9CY6134.kda   | 0%        | (0.7)      | unknown | 8       | 11 |   |
| 977 | TRUE | Empty | EF-hand domain-containing protein 1 OS-Mus musculus GN-Dyef1 PE-2 SV-1                                | sp Q9S9720.kda    | 0%        | (0.5)      | unknown | 6       | 15 |   |
| 978 | TRUE | Empty | Testicular haploid expressed gene protein OS-Mus musculus GN-Theg PE-1 SV-1                           | sp Q9JMB.43.kda   | TRUE      | 0% (0.7)   | unknown | 6       | 9  |   |
| 979 | TRUE | Empty | Protein Rf1 OS-Mus musculus GN-Rf1 PE-2 SV-1                                                          | tr E9PWW.161.kda  | 0%        | (0.6)      | unknown | 4       | 7  |   |
| 980 | TRUE | Empty | MCG1574, isoform CRA_b OS-Mus musculus GN-Rbc2 PE-4 SV-1                                              | tr G3X8P.45.kda   | 0%        | (1.1)      | unknown | 10      | 9  |   |
| 981 | TRUE | Empty | Coiled-coil domain-containing protein 151 OS-Mus musculus GN-Ccdc151 PE-4 SV-1                        | tr Q3R551.70.kda  | 0%        | (0.6)      | unknown | 5       | 10 |   |
| 982 | TRUE | Empty | A kinase (PKA) anchor protein like OS-Mus musculus GN-Akap2 PE-2 SV-1                                 | tr Q3R51.71.kda   | 0%        | (0.6)      | unknown | 5       | 9  |   |
| 983 | TRUE | Empty | Phospholipase C beta 4 OS-Mus musculus GN-Pclc4 PE-2 SV-1                                             | tr Q3LU22.135.kda | TRUE      | 0% (0.6)   | unknown | 5       | 9  |   |
| 984 | TRUE | Empty | Junctophilin 1 protein OS-Mus musculus GN-Jphi1 PE-1 SV-2                                             | sp P23243.41.kda  | 0%        | (0.5)      | unknown | 6       | 12 |   |
| 985 | TRUE | Empty | MYCBP-associated protein OS-Mus musculus GN-Mycbap PE-2 SV-1                                          | sp Q55V1206.kda   | 0%        | (0.8)      | unknown | 7       | 4  |   |
| 986 | TRUE | Empty | Normal mucosa of esophagus-specific gene 1 protein OS-Mus musculus GN-Nmes1 PE-2 SV-1                 | sp Q810Q2.10.kda  | 0%        | (0.9)      | unknown | 10      | 9  |   |
| 987 | TRUE | Empty | THO complex subunit 2 OS-Mus musculus GN-Thoc2 PE-2 SV-1                                              | sp B1AZ26.183.kda | 0%        | (1.4)      | unknown | 4       | 11 |   |
| 988 | TRUE | Empty | Famin-B OS-Mus musculus GN-Fbn PE-1 SV-3                                                              | sp Q80W0279.kda   | 0%        | (0.5)      | unknown | 3       | 12 |   |
| 989 | TRUE | Empty | Small nuclear ribonucleoprotein Sm D1 OS-Mus musculus GN-Snrdp1 PE-1 SV-1                             | sp P42315.13.kda  | 0%        | (0.9)      | unknown | 9       | 10 |   |
| 990 | TRUE | Empty | H1 histone family, member X OS-Mus musculus GN-H1fx PE-2 SV-1                                         | tr Q8ZM25.20.kda  | 0%        | (1.1)      | unknown | 11      | 10 |   |
| 991 | TRUE | Empty | Serine/threonine-protein phosphatase PGAMS, mitochondrial OS-Mus musculus GN-Pgam5 PE-2 SV-1          | sp Q8BX1632.kda   | 0%        | (1.7)      | unknown | 5       | 3  |   |
| 992 | TRUE | Empty | Bcl-2-associated transcription factor 1 OS-Mus musculus GN-Bclaf1 PE-2 SV-1                           | sp Q80K1910.kda   | 0%        | (0.3)      | unknown | 3       | 9  |   |
| 993 | TRUE | Empty | Uncharacterized protein C17orf47 homolog OS-Mus musculus GN-GM1492 PE-4 SV-1                          | sp Q5ND1599.kda   | 0%        | (0.3)      | unknown | 3       | 10 |   |
| 994 | TRUE | Empty | Keratin 15, isoform CRA_a OS-Mus musculus GN-Krt15 PE-3 SV-1                                          | tr B1AQ77.49.kda  | TRUE      | 95% (2.1)  | unknown | 3       | 7  |   |
| 995 | TRUE | Empty | Thioredoxin reductase 3 OS-Mus musculus GN-Trrd3 PE-2 SV-1                                            | tr G3X8P.68.kda   | TRUE      | 95% (0.0)  | unknown | 0       | 19 |   |
| 996 | TRUE | Empty | Coiled-coil domain-containing protein 62 OS-Mus musculus GN-Ccdc62 PE-2 SV-1                          | sp E9P9V.179.kda  |           |            |         |         |    |   |

|      |      |       |                                                                                                                        |                     |           |           |         |    |    |
|------|------|-------|------------------------------------------------------------------------------------------------------------------------|---------------------|-----------|-----------|---------|----|----|
| 1032 | TRUE | Empty | Splicing factor 3B subunit 4 OS-Mus musculus GN-SFB34 PE-2 SV-1                                                        | sp Q8QZY44 kDa      | 95% (0.5) | unknown   | 6       | 12 |    |
| 1033 | TRUE | Empty | Serine/threonine-protein phosphatase 2A 55 kDa regulatory subunit B delta isoform OS-Mus musculus GN-Ppp2r2b PE-2 SV-1 | sp Q2925752 kDa     | 0% (0.7)  | unknown   | 6       | 9  |    |
| 1034 | TRUE | Empty | Decay-accelerated protein 1 OS-Mus musculus GN-Cdnt1p1 PE-2 SV-1                                                       | sp Q9R81971 kDa     | 0% (0.9)  | unknown   | 7       | 8  |    |
| 1035 | TRUE | Empty | ATP-dependent RNA helicase DDX50 OS-Mus musculus GN-Ddx50 PE-2 SV-1                                                    | sp Q99M982 kDa      | 95% (0.4) | unknown   | 4       | 9  |    |
| 1036 | TRUE | Empty | RING finger protein 151 OS-Mus musculus GN-Rnf151 PE-1 SV-1                                                            | sp Q9CQ2277 kDa     | 0% (0.9)  | unknown   | 8       | 9  |    |
| 1037 | TRUE | Empty | 5S ribosomal protein L11, mitochondrial OS-Mus musculus GN-MtLp11 PE-2 SV-1                                            | sp Q9CQV221 kDa     | 95% (2.4) | unknown   | 12      | 5  |    |
| 1038 | TRUE | Empty | RNA-binding protein 8A OS-Mus musculus GN-Rbm8a PE-2 SV-1                                                              | sp Q9CKW240 kDa     | 0% (0.9)  | unknown   | 9       | 10 |    |
| 1039 | TRUE | Empty | Cysteine-rich with EGF-like domain protein 2 OS-Mus musculus GN-Crelid2 PE-2 SV-1                                      | sp Q9CYAC38 kDa     | 0% (0.7)  | unknown   | 7       | 10 |    |
| 1040 | TRUE | Empty | Aldehyde dehydrogenase X, mitochondrial OS-Mus musculus GN-Adhd1b1 PE-2 SV-1                                           | sp Q9CZ158 kDa      | 0% (1.0)  | unknown   | 8       | 8  |    |
| 1041 | TRUE | Empty | Synaptotagmin complex central element protein 1 OS-Mus musculus GN-Sytc1 PE-1 SV-1                                     | sp Q9CQV378 kDa     | 0% (1.0)  | unknown   | 6       | 6  |    |
| 1042 | TRUE | Empty | Septin 14 OS-Mus musculus GN-Sept14 PE-2 SV-1                                                                          | sp Q9DA0550 kDa     | TRUE      | 0% (0.8)  | unknown | 6  | 9  |
| 1043 | TRUE | Empty | Protein DD1 homolog 1 OS-Mus musculus GN-DD1 PE-1 SV-1                                                                 | sp Q9DAF146 kDa     | 95% (0.4) | unknown   | 4       | 9  |    |
| 1044 | TRUE | Empty | 15 kDa selenoprotein OS-Mus musculus GN-Sept5 PE-1 SV-3                                                                | sp Q9D8R718 kDa     | 0% (1.0)  | unknown   | 9       | 9  |    |
| 1045 | TRUE | Empty | Ubiquitin carboxyl-terminal hydrolase isozyme L1 OS-Mus musculus GN-Uhd1b1 PE-1 SV-1                                   | sp Q9DR2925 kDa     | 0% (1.3)  | unknown   | 9       | 7  |    |
| 1046 | TRUE | Empty | Ubiquitin carboxyl-terminal hydrolase isozyme L5 OS-Mus musculus GN-Uhd15 PE-2 SV-2                                    | sp Q9D9UW38 kDa     | 0% (1.6)  | unknown   | 8       | 5  |    |
| 1047 | TRUE | Empty | Mitotic checkpoint protein Bub3 OS-Mus musculus GN-Bub3 PE-2 SV-2                                                      | sp Q9D9V377 kDa     | 0% (0.8)  | unknown   | 3       | 4  |    |
| 1048 | TRUE | Empty | Serine/threonine-protein kinase haspin OS-Mus musculus GN-Gsg2 PE-1 SV-3                                               | sp Q9D29084 kDa     | 0% (1.0)  | unknown   | 6       | 6  |    |
| 1049 | TRUE | Empty | Tc2D protein OS-Mus musculus GN-Tc2D PE-1 SV-1                                                                         | tr E95H1712162.kDa  | 0% (0.7)  | unknown   | 5       | 7  |    |
| 1050 | TRUE | Empty | Isoacrylate dehydrogenase 3 (NAD+) beta OS-Mus musculus GN-Ihd3b PE-2 SV-1                                             | tr Q91V4742 kDa     | 0% (0.9)  | unknown   | 7       | 8  |    |
| 1051 | TRUE | Empty | Protein 4932418248k OS-Mus musculus GN-4932418248k PE-2 SV-1                                                           | tr Q9C5V8105 kDa    | 95% (0.4) | unknown   | 2       | 5  |    |
| 1052 | TRUE | Empty | Protein BC051142 OS-Mus musculus GN-BC051142 PE-2 SV-1                                                                 | tr Q10W045 kDa      | TRUE      | 0% (0.9)  | unknown | 7  | 8  |
| 1053 | TRUE | Empty | Metaxin 2 OS-Mus musculus GN-Mtx2 PE-1 SV-1                                                                            | sp Q9B44130 kDa     | 0% (0.7)  | unknown   | 6       | 9  |    |
| 1054 | TRUE | Empty | Cytochrome c oxidase subunit 4 isoform 1, mitochondrial OS-Mus musculus GN-Cox4l1 PE-1 SV-2                            | tr P19783 20 kDa    | TRUE      | 0% (0.8)  | unknown | 4  | 5  |
| 1055 | TRUE | Empty | Bromodomain-containing protein 8 OS-Mus musculus GN-Brdb PE-1 SV-2                                                     | sp Q9R38103 kDa     | 0% (0.8)  | unknown   | 5       | 6  |    |
| 1056 | TRUE | Empty | Protein BUD31 homolog OS-Mus musculus GN-Bud31 PE-1 SV-1                                                               | tr E9C2C017 kDa     | 95% (0.4) | unknown   | 3       | 8  |    |
| 1057 | TRUE | Empty | Zinc finger B box domain-containing protein 1 OS-Mus musculus GN-Zfbb PE-2 SV-1                                        | sp Q9P5C380 kDa     | 95% (0.3) | unknown   | 2       | 7  |    |
| 1058 | TRUE | Empty | Septin-7 OS-Mus musculus GN-Sept7 PE-2 SV-2                                                                            | tr E9Q1G8 51 kDa    | TRUE      | 0% (0.7)  | unknown | 5  | 10 |
| 1059 | TRUE | Empty | Transcription elongation factor B polypeptide 2 OS-Mus musculus GN-Tfeb2 PE-1 SV-1                                     | sp Q9P2689 13 kDa   | 0% (0.7)  | unknown   | 7       | 10 |    |
| 1060 | TRUE | Empty | Protein GM95 OS-Mus musculus GN-GM95 PE-1 SV-1                                                                         | tr A2A7F9 76 kDa    | 95% (2.2) | unknown   | 9       | 4  |    |
| 1061 | TRUE | Empty | Prothymosin 1 OS-Mus musculus GN-1700032848k PE-1 SV-1                                                                 | tr Q9D8R248 kDa     | 0% (0.9)  | unknown   | 7       | 8  |    |
| 1062 | TRUE | Empty | WD repeat-containing protein 35 OS-Mus musculus GN-Wdr35 PE-2 SV-3                                                     | sp Q9B886134 kDa    | 95% (3.0) | unknown   | 6       | 2  |    |
| 1063 | TRUE | Empty | Rac-related protein Rab-18 OS-Mus musculus GN-Rab18 PE-2 SV-2                                                          | sp P32593 23 kDa    | 0% (1.8)  | unknown   | 7       | 4  |    |
| 1064 | TRUE | Empty | 14S ribosomal protein L10 OS-Mus musculus GN-Rpl10 PE-1 SV-1                                                           | sp Q9R6929 23 kDa   | 0% (1.2)  | unknown   | 10      | 8  |    |
| 1065 | TRUE | Empty | MCG148435 OS-Mus musculus GN-1700014004k PE-4 SV-1                                                                     | tr J1020529 105 kDa | 95% (0.3) | unknown   | 3       | 9  |    |
| 1066 | TRUE | Empty | Protein Cdc146 OS-Mus musculus GN-Cdc146 PE-2 SV-1                                                                     | tr E9DQ77 115 kDa   | 0% (0.5)  | unknown   | 3       | 6  |    |
| 1067 | TRUE | Empty | Fructose-bisphosphate aldolase OS-Mus musculus GN-Aldoa2 PE-2 SV-1                                                     | tr A62471 39 kDa    | TRUE      | 0% (0.6)  | unknown | 5  | 10 |
| 1068 | TRUE | Empty | Nuclear pore complex protein Nup101 OS-Mus musculus GN-Nup101 PE-1 SV-2                                                | sp Q9D20158 kDa     | 0% (0.7)  | unknown   | 3       | 11 |    |
| 1069 | TRUE | Empty | Lymphocyte-activated killer T-cell-originated protein kinase OS-Mus musculus GN-Pbk PE-2 SV-1                          | sp Q9J7B137 kDa     | 95% (INF) | unknown   | 9       | 0  |    |
| 1070 | TRUE | Empty | Protein FAM24A OS-Mus musculus GN-Fam24a PE-1 SV-1                                                                     | sp Q9C7F127 kDa     | 0% (0.7)  | unknown   | 4       | 6  |    |
| 1071 | TRUE | Empty | MCG1271 OS-Mus musculus GN-Scsdp3 PE-2 SV-1                                                                            | tr Q1U1C495 kDa     | 95% (0.0) | unknown   | 0       | 1  |    |
| 1072 | TRUE | Empty | GTP-binding protein Gs11 OS-Mus musculus GN-Gs11 PE-1 SV-2                                                             | sp Q9S82372 kDa     | 0% (1.7)  | unknown   | 6       | 7  |    |
| 1073 | TRUE | Empty | Peroxiredoxin-6 OS-Mus musculus GN-Prx6 PE-1 SV-3                                                                      | sp Q9070925 kDa     | TRUE      | 0% (0.9)  | unknown | 6  | 7  |
| 1074 | TRUE | Empty | Eukaryotic translation initiation factor 6 OS-Mus musculus GN-EIf6 PE-1 SV-2                                           | sp Q9S13527 kDa     | TRUE      | 0% (0.6)  | unknown | 5  | 8  |
| 1075 | TRUE | Empty | Dynein light chain Tctex-type 1 OS-Mus musculus GN-Dynt1l PE-1 SV-1                                                    | sp Q9D789 12 kDa    | 0% (1.4)  | unknown   | 10      | 7  |    |
| 1076 | TRUE | Empty | Vepr mobility group protein 81 OS-Mus musculus GN-Vepr81 PE-1 SV-2                                                     | sp Q9E21525 kDa     | TRUE      | 0% (0.8)  | unknown | 7  | 8  |
| 1077 | TRUE | Empty | Protein misato homolog 1 OS-Mus musculus GN-Mtsol1 PE-2 SV-1                                                           | sp Q9D7W61 kDa      | 0% (0.7)  | unknown   | 2       | 3  |    |
| 1078 | TRUE | Empty | Microtubule-associated protein RP/EB family member 3 OS-Mus musculus GN-Mape3 PE-1 SV-1                                | sp Q9P6R332 kDa     | 0% (0.8)  | unknown   | 8       | 10 |    |
| 1079 | TRUE | Empty | Nestin OS-Mus musculus GN-Nesn PE-1 SV-3                                                                               | sp Q27P76 72 kDa    | 0% (1.0)  | unknown   | 6       | 6  |    |
| 1080 | TRUE | Empty | Pyruvate dehydrogenase X component, mitochondrial OS-Mus musculus GN-Pdhx PE-2 SV-1                                    | sp Q9R82524 kDa     | 0% (1.4)  | unknown   | 9       | 5  |    |
| 1081 | TRUE | Empty | Paraspeckle component 1 OS-Mus musculus GN-Pspcl1 PE-1 SV-1                                                            | sp Q9R32559 kDa     | 0% (1.8)  | unknown   | 9       | 5  |    |
| 1082 | TRUE | Empty | Pre-mRNA-splicing factor SPF27 OS-Mus musculus GN-Bca2 PE-2 SV-1                                                       | sp Q9D28726 kDa     | 0% (0.9)  | unknown   | 6       | 7  |    |
| 1083 | TRUE | Empty | Transcription elongation factor A protein 2 OS-Mus musculus GN-Tcea2 PE-2 SV-2                                         | sp Q9D29M 84 kDa    | 0% (1.3)  | unknown   | 9       | 8  |    |
| 1084 | TRUE | Empty | Vesicle-associated membrane protein-associated protein 8 OS-Mus musculus GN-Vamp8 PE-2 SV-3                            | sp Q9DQV127 kDa     | TRUE      | 0% (0.9)  | unknown | 7  | 8  |
| 1085 | TRUE | Empty | Serine/arginine-rich splicing factor 10 OS-Mus musculus GN-Srsf10 PE-1 SV-2                                            | sp Q9R0U31 kDa      | 0% (1.0)  | unknown   | 8       | 8  |    |
| 1086 | TRUE | Empty | Large proline-rich protein BAG6 OS-Mus musculus GN-Bag6 PE-1 SV-1                                                      | tr Q29I2121 12 kDa  | 0% (0.7)  | unknown   | 6       | 9  |    |
| 1087 | TRUE | Empty | Protein Spag8 OS-Mus musculus GN-Spag8 PE-2 SV-1                                                                       | tr Q1V0C551 kDa     | 0% (0.9)  | unknown   | 7       | 7  |    |
| 1088 | TRUE | Empty | Protein Sept12 OS-Mus musculus GN-Sept12 PE-2 SV-1                                                                     | sp Q9D45136 kDa     | 0% (0.7)  | unknown   | 5       | 7  |    |
| 1089 | TRUE | Empty | Colicid-cold domain-containing protein 160 OS-Mus musculus GN-Cdc160 PE-2 SV-1                                         | sp Q9J3U7 3 kDa     | 0% (1.2)  | unknown   | 6       | 5  |    |
| 1090 | TRUE | Empty | MRG/MORF4L-binding protein OS-Mus musculus GN-Mrgbp PE-2 SV-1                                                          | sp Q9DA0722 kDa     | 0% (0.6)  | unknown   | 7       | 12 |    |
| 1091 | TRUE | Empty | [Pyruvate dehydrogenase [pyruvate] kinase isozyme 3, mitochondrial OS-Mus musculus GN-Pdk3 PE-2 SV-1                   | sp Q9D21448 kDa     | 95% (2.0) | unknown   | 6       | 3  |    |
| 1092 | TRUE | Empty | Tetraspecific serine/threonine-protein kinase 6 OS-Mus musculus GN-Tsk6 PE-2 SV-1                                      | sp Q9D25K930 kDa    | 0% (1.0)  | unknown   | 8       | 8  |    |
| 1093 | TRUE | Empty | Eukaryotic translation initiation factor 5 OS-Mus musculus GN-EIf5 PE-1 SV-1                                           | sp P93925 49 kDa    | 0% (1.0)  | unknown   | 9       | 9  |    |
| 1094 | TRUE | Empty | BAG family molecular chaperone regulator 2 OS-Mus musculus GN-Bag2 PE-1 SV-1                                           | sp Q9H1M23 kDa      | 0% (0.8)  | unknown   | 5       | 6  |    |
| 1095 | TRUE | Empty | Protein 4932418248k interacting multifunctional protein 2 OS-Mus musculus GN-Aimp2 PE-1 SV-2                           | sp Q9R01035 kDa     | 0% (0.8)  | unknown   | 4       | 5  |    |
| 1096 | TRUE | Empty | Protein Tps3g5 OS-Mus musculus GN-Tps3g5 PE-2 SV-1                                                                     | tr Q9D976 28 kDa    | 0% (0.6)  | unknown   | 6       | 10 |    |
| 1097 | TRUE | Empty | Cytochrome c oxidase subunit 5A, mitochondrial OS-Mus musculus GN-Cox5a PE-1 SV-2                                      | tr P12787 16 kDa    | 0% (0.6)  | unknown   | 5       | 8  |    |
| 1098 | TRUE | Empty | Chromobion protein homolog 1 OS-Mus musculus GN-Chb1 PE-1 SV-1                                                         | sp Q9R971 21 kDa    | TRUE      | 95% (0.4) | unknown | 3  | 11 |
| 1099 | TRUE | Empty | Protein ribonucleoprotein X OS-Mus musculus GN-Rngx PE-1 SV-1                                                          | sp Q9C362 11 kDa    | 0% (1.7)  | unknown   | 7       | 8  |    |
| 1100 | TRUE | Empty | Protein Smaug homolog 1 OS-Mus musculus GN-Samd4 PE-1 SV-2                                                             | sp Q9C1Y878 kDa     | 95% (0.4) | unknown   | 3       | 8  |    |
| 1101 | TRUE | Empty | MCG18410, isoform CRA_a OS-Mus musculus GN-Ddx23 PE-4 SV-1                                                             | tr D32M0995 kDa     | 0% (0.7)  | unknown   | 2       | 3  |    |
| 1102 | TRUE | Empty | Protein Rg22 OS-Mus musculus GN-Rg22 PE-2 SV-1                                                                         | tr G19Y29 146 kDa   | 0% (0.2)  | unknown   | 2       | 10 |    |
| 1103 | TRUE | Empty | Protein 4932418248k OS-Mus musculus GN-4932418248k PE-4 SV-1                                                           | tr Q9E8V6 27 kDa    | 0% (0.8)  | unknown   | 7       | 1  |    |
| 1104 | TRUE | Empty | Spermidine/spermine N(1)-acetyltransferase-like protein 1 OS-Mus musculus GN-Sat1 PE-2 SV-2                            | sp Q9S05N83 kDa     | 95% (0.2) | unknown   | 2       | 10 |    |
| 1105 | TRUE | Empty | Nuclear transcription factor 1 OS-Mus musculus GN-Ubf1 PE-4 SV-1                                                       | tr A2AWT589 kDa     | TRUE      | 95% (INF) | unknown | 12 | 0  |
| 1106 | TRUE | Empty | 14-3-3 protein theta (Fragment) OS-Mus musculus GN-Yhaq PE-1 SV-1                                                      | tr Q1F7693 32 kDa   | TRUE      | 95% (0.0) | unknown | 0  | 17 |
| 1107 | TRUE | Empty | Protein Ccfr211 homolog OS-Mus musculus GN-CC211 PE-2 SV-1                                                             | tr A9H6V51 kDa      | 0% (1.8)  | unknown   | 9       | 6  |    |
| 1108 | TRUE | Empty | Zinc finger RNA-binding protein OS-Mus musculus GN-Zfr PE-1 SV-2                                                       | sp Q9B8532F 12 kDa  | 0% (0.7)  | unknown   | 4       | 5  |    |
| 1109 | TRUE | Empty | Cysteine-rich secretory protein 2 OS-Mus musculus GN-Crsp2 PE-1 SV-1                                                   | sp P15563 6 kDa     | 0% (0.9)  | unknown   | 7       | 8  |    |
| 1110 | TRUE | Empty | Inosine 5'-monophosphate dehydrogenase 2 OS-Mus musculus GN-Ihdp2 PE-1 SV-2                                            | sp P24547 56 kDa    | 95% (2.7) | unknown   | 8       | 3  |    |
| 1111 | TRUE | Empty | Radiol OS-Mus musculus GN-Rad1 PE-1 SV-1                                                                               | sp P20463 69 kDa    | 0% (0.7)  | unknown   | 7       | 7  |    |
| 1112 | TRUE | Empty | Aladin OS-Mus musculus GN-Aas PE-1 SV-1                                                                                | sp P58742 59 kDa    | 0% (0.6)  | unknown   | 5       | 9  |    |
| 1113 | TRUE | Empty | Tumor suppressor candidate 3 OS-Mus musculus GN-Tusc3 PE-2 SV-1                                                        | sp Q9B7Y40 kDa      | 0% (0.9)  | unknown   | 7       | 8  |    |
| 1114 | TRUE | Empty | Protein 4932418248k associated serine-rich protein 2 OS-Mus musculus GN-Spats2 PE-1 SV-1                               | sp Q9R1M59 kDa      | 0% (0.5)  | unknown   | 8       | 8  |    |
| 1115 | TRUE | Empty | HMG box transcription factor 8B OS-Mus musculus GN-Hbx PE-1 SV-2                                                       | sp Q9R8V101 kDa     | 0% (0.6)  | unknown   | 4       | 7  |    |
| 1116 | TRUE | Empty | Mitochondrial fission regulator 1-like OS-Mus musculus GN-Mfr1l1 PE-1 SV-1                                             | sp Q9C9V1 32 kDa    | 0% (1.2)  | unknown   | 7       | 6  |    |
| 1117 | TRUE | Empty | Protein GM7347 OS-Mus musculus GN-GM7347 PE-1 SV-1                                                                     | tr D11993 32 kDa    | TRUE      | 95% (0.5) | unknown | 4  | 8  |
| 1118 | TRUE | Empty | Colicid-cold domain-containing protein 38 OS-Mus musculus GN-Cdc38 PE-4 SV-1                                           | sp Q9D2N06 kDa      | 0% (0.8)  | unknown   | 7       | 4  |    |
| 1119 | TRUE | Empty | Serine/threonine-protein kinase PR81 homote OS-Mus musculus GN-Prp4b PE-1 SV-3                                         | sp Q9E1131617 kDa   | 0% (1.0)  | unknown   | 3       | 3  |    |
| 1120 | TRUE | Empty | Catenin beta-1 OS-Mus musculus GN-Ctnb1 PE-1 SV-1                                                                      | sp Q9D24885 kDa     | TRUE      | 95% (0.2) | unknown | 2  | 8  |
| 1121 | TRUE | Empty | Fibrinogen beta chain OS-Mus musculus GN-Fbg PE-2 SV-1                                                                 | sp Q9R0K855 kDa     | 0% (0.7)  | unknown   | 2       | 3  |    |
| 1122 | TRUE | Empty | ATP-dependent pyrophosphatase 2 OS-Mus musculus GN-Ppy2 PE-1 SV-4                                                      | sp Q9C5A235 kDa     | 95% (1.2) | unknown   | 9       | 4  |    |
| 1123 | TRUE | Empty | Methylosome protein 50 OS-Mus musculus GN-Wdr77 PE-1 SV-1                                                              | sp Q9D909 37 kDa    | 0% (0.6)  | unknown   | 3       | 5  |    |
| 1124 | TRUE | Empty | BAG family molecular chaperone regulator 1 OS-Mus musculus GN-Bag1 PE-1 SV-3                                           | sp Q9D78940 kDa     | 0% (0.6)  | unknown   | 3       | 5  |    |
| 1125 | TRUE | Empty | FYVE and colicid-cold domain-containing protein 1 OS-Mus musculus GN-Fyco1 PE-1 SV-1                                   | sp Q9D9C162 kDa     | 95% (0.2) | unknown   | 2       | 10 |    |
| 1126 | TRUE | Empty | Vepr mobility group protein 81 OS-Mus musculus GN-Vepr81 PE-1 SV-2                                                     | sp Q9E21525 kDa     | 0% (0.8)  | unknown   | 5       | 3  |    |
| 1127 | TRUE | Empty | Ankyrin repeat domain-containing protein 45 OS-Mus musculus GN-Ankr45 PE-2 SV-1                                        | sp Q9I0M28 kDa      | 95% (0.4) | unknown   | 3       | 8  |    |
| 1128 | TRUE | Empty | Cleavage stimulation factor subunit 1 OS-Mus musculus GN-Csf1 PE-2 SV-1                                                | sp Q9C9248 kDa      | 95% (0.4) | unknown   | 2       | 5  |    |
| 1129 | TRUE | Empty | U3 small nuclear ribonucleoprotein protein MPF10 OS-Mus musculus GN-Mphosph10 PE-1 SV-2                                | sp Q9L0V79 kDa      | 95% (0.5) | unknown   | 3       | 6  |    |
| 1130 | TRUE | Empty | Protein Hw46 OS-Mus musculus GN-Hw46 PE-2 SV-1                                                                         | tr E92742 149 kDa   | 0% (1.0)  | unknown   | 4       | 7  |    |
| 1131 | TRUE | Empty | Beta-defensin 3 OS-Mus musculus GN-Dfb3 PE-2 SV-2                                                                      | sp Q9K3U48 kDa      | 0% (1.0)  | unknown   | 6       | 6  |    |
| 1132 | TRUE | Empty | SUMO-activating enzyme subunit 2 OS-Mus musculus GN-Uba2 PE-2 SV-1                                                     | sp Q9I29179 kDa     | 95% (7.0) | unknown   | 7       | 1  |    |
| 1133 | TRUE | Empty | Outer dense fiber protein 2 (Fragment) OS-Mus musculus GN-Ofdf2 PE-4 SV-1                                              | tr F47321 31 kDa    | TRUE      | 0% (0.8)  | unknown | 8  | 7  |
| 1134 | TRUE | Empty | 13A finger CCCC domain-containing protein 14 OS-Mus musculus GN-C3h14 PE-1 SV-1                                        | sp Q9R9M5 82 kDa    | 0% (0.5)  | unknown   | 0       | 6  |    |
| 1135 | TRUE | Empty | Thioredoxin reductase 3 OS-Mus musculus GN-Trrd3 PE-1 SV-3                                                             | sp Q99M97 1 kDa     | TRUE      | 95% (INF) | unknown | 11 | 0  |
| 1136 | TRUE | Empty | Centrosome and spindle pole associated protein 1 OS-Mus musculus GN-Cpp1 PE-2 SV-2                                     | tr B2R8X8 138 kDa   | TRUE      | 95% (0.4) | unknown | 4  | 10 |
| 1137 | TRUE | Empty | Centrifugal kinase 2 OS-Mus musculus GN-Cfk2 PE-1 SV-2                                                                 | sp Q9474777 kDa     | 0% (1.2)  | unknown   | 7       | 6  |    |
| 1138 | TRUE | Empty | Signal recognition particle 14 kDa protein OS-Mus musculus GN-Srp14 PE-1 SV-1                                          | sp Q9L02414 13 kDa  | 0% (0.8)  | unknown   | 6       | 8  |    |
| 1139 | TRUE | Empty | Tubulin alpha-1C chain OS-Mus musculus GN-Tuba1c PE-1 SV-1                                                             | sp P68373 50 kDa    | 0% (0.8)  | unknown   | 2       | 11 |    |
| 1140 | TRUE | Empty | T-complex protein 11 OS-Mus musculus GN-Tcp11 PE-2 SV-1                                                                | sp Q9J75562 kDa     | 0% (0.6)  | unknown   | 4       | 7  |    |
| 1141 | TRUE | Empty | 42S ribosome-associated hydrolytic domain-containing protein 2A OS-Mus musculus GN-Fahd2 PE-1 SV-1                     | sp Q1CTC7235 kDa    | 0% (1.0)  | unknown   | 2       | 5  |    |
| 1142 | TRUE | Empty | Regulator of microtubule dynamics protein 2 OS-Mus musculus GN-Rmd2 PE-2 SV-1                                          | sp Q9B5047 kDa      | 0% (0.9)  | unknown   | 7       | 8  |    |
| 1143 | TRUE | Empty | RNA-binding protein 28 OS-Mus musculus GN-Rbn28 PE-1 SV-4                                                              | sp Q9C8C84 kDa      | 0% (1.2)  | unknown   | 6       | 5  |    |
| 1144 | TRUE | Empty | Deoxyribose5-phosphatase 2 OS-Mus musculus GN-Dntp2 PE-1 SV-1                                                          | sp Q9R2M84 kDa      | 0% (0.8)  | unknown   | 5       | 6  |    |
| 1145 | TRUE | Empty | Cytosol aminopeptidase OS-Mus musculus GN-Ciap1 PE-1 SV-3                                                              | sp Q9D9P756 kDa     | 0% (1.6)  | unknown   | 8       | 5  |    |
| 1146 | TRUE | Empty | Inorganic pyrophosphatase OS-Mus musculus GN-Pp1a1 PE-1 SV-1                                                           | sp Q9D81533 kDa     | TRUE      | 95% (2.0) | unknown | 8  | 4  |
| 1147 | TRUE | Empty | Tyrosyl-DNA phosphodiesterase 1 OS-Mus musculus GN-Tdp1 PE-4 SV-1                                                      | tr B8UJ1169 kDa     | 0% (1.0)  | unknown   | 5       | 5  |    |
| 1148 | TRUE | Empty | Targeting protein for Xkp2 OS-Mus musculus GN-Txpd2 PE-1 SV-1                                                          | sp A2AP886 kDa      | 95% (0.4) | unknown   | 3       | 8  |    |
| 1149 | TRUE | Empty | Protein GM7073 OS-Mus musculus GN-GM7073 PE-1 SV-1                                                                     | tr E9CA61 38 kDa    | 0% (1.0)  | unknown   | 9       | 5  |    |
| 1150 | TRUE | Empty | Metaxin-1 OS-Mus musculus GN-Mtx1 PE-2 SV-1                                                                            | tr F7C845 51 kDa    | 0% (1.0)  | unknown   | 6       | 6  |    |
| 1    |      |       |                                                                                                                        |                     |           |           |         |    |    |



|      |      |       |                                                                                                                                                |                   |      |       |         |         |    |   |
|------|------|-------|------------------------------------------------------------------------------------------------------------------------------------------------|-------------------|------|-------|---------|---------|----|---|
| 1185 | TRUE | Empty | Protein Ethn1 OS-Mus musculus GN-Ethn1 PE-4 SV-1                                                                                               | tr E9Q122.68.kda  | 0%   | (1.0) | unknown | 5       | 5  |   |
| 1186 | TRUE | Empty | Caprin-1 OS-Mus musculus GN-Caprin1 PE-1 SV-2                                                                                                  | sp Q60865.78.kda  | 0%   | (0.8) | unknown | 4       | 5  |   |
| 1187 | TRUE | Empty | Malate dehydrogenase, mitochondrial OS-Mus musculus GN-Mdh2 PE-1 SV-3                                                                          | sp P92846.35.kda  | 0%   | (1.5) | unknown | 7       | 2  |   |
| 1188 | TRUE | Empty | Signal recognition particle 19 kDa protein OS-Mus musculus GN-Srp19 PE-2 SV-1                                                                  | tr Q90104.16.kda  | 0%   | (1.2) | unknown | 7       | 6  |   |
| 1189 | TRUE | Empty | ATP-binding cassette sub-family F member 3 OS-Mus musculus GN-Abcf3 PE-1 SV-1                                                                  | sp Q8K2880.kda    | 95%  | (0.5) | unknown | 3       | 6  |   |
| 1190 | TRUE | Empty | Fibrinogen gamma chain OS-Mus musculus GN-Fbg PE-2 SV-1                                                                                        | sp Q8VCA489.kda   | 95%  | (0.2) | unknown | 1       | 6  |   |
| 1191 | TRUE | Empty | Leucoproteinase 2 OS-Mus musculus GN-Lp2 PE-1 SV-3                                                                                             | sp Q7052029.kda   | 0%   | (0.7) | unknown | 4       | 6  |   |
| 1192 | TRUE | Empty | DnaJ homolog subfamily C member 2 OS-Mus musculus GN-Dnaj2 PE-1 SV-2                                                                           | sp P54103.72.kda  | 0%   | (0.7) | unknown | 2       | 3  |   |
| 1193 | TRUE | Empty | Threonine asparagine 1 OS-Mus musculus GN-Taspa1 PE-2 SV-1                                                                                     | sp Q8RI1444.kda   | 0%   | (0.6) | unknown | 5       | 9  |   |
| 1194 | TRUE | Empty | ADP-ribosylation factor-like protein 1 OS-Mus musculus GN-Arf1 PE-2 SV-1                                                                       | sp Q8884823.kda   | 0%   | (1.8) | unknown | 7       | 4  |   |
| 1195 | TRUE | Empty | Cytochrome c oxidase subunit 6B OS-Mus musculus GN-Cox6b2 PE-2 SV-1                                                                            | sp Q8028111.kda   | 95%  | (2.0) | unknown | 8       | 4  |   |
| 1196 | TRUE | Empty | Nuclear protein MDM1 OS-Mus musculus GN-Mdm1 PE-2 SV-2                                                                                         | sp Q9006780.kda   | 95%  | (0.4) | unknown | 2       | 5  |   |
| 1197 | TRUE | Empty | Proteasome subunit beta 3 OS-Mus musculus GN-Psm3 PE-1 SV-1                                                                                    | sp Q9R11233.kda   | 0%   | (0.6) | unknown | 5       | 8  |   |
| 1198 | TRUE | Empty | Protein tyrosyl O-tiara isomerase FRB4 OS-Mus musculus GN-Frb4 PE-1 SV-5                                                                       | sp P30415.52.kda  | 95%  | (3.0) | unknown | 9       | 3  |   |
| 1199 | TRUE | Empty | Protein Ahnak OS-Mus musculus GN-Ahnak PE-1 SV-1                                                                                               | tr E9Q616.604.kda | 0%   | (1.0) | unknown | 3       | 3  |   |
| 1200 | TRUE | Empty | Exosome complex component RRP46 OS-Mus musculus GN-Eoss5 PE-1 SV-1                                                                             | sp Q9CRA225.kda   | 0%   | (1.5) | unknown | 6       | 4  |   |
| 1201 | TRUE | Empty | H/ACA ribonucleoprotein complex subunit 3 OS-Mus musculus GN-Nop10 PE-3 SV-1                                                                   | sp Q9CC528.kda    | 0%   | (1.1) | unknown | 8       | 7  |   |
| 1202 | TRUE | Empty | DnaB homolog subfamily C member 3 OS-Mus musculus GN-Dnaj3 PE-2 SV-1                                                                           | sp Q91V157.kda    | 0%   | (0.8) | unknown | 3       | 4  |   |
| 1203 | TRUE | Empty | Nascent polypeptide-associated complex subunit alpha, muscle-specific form OS-Mus musculus GN-Naca PE-1 SV-2                                   | sp P70670.220.kda | TRUE | 95%   | (INF)   | unknown | 11 | 0 |
| 1204 | TRUE | Empty | Disintegrin and metalloprotease domain-containing protein 5 OS-Mus musculus GN-Adams PE-2 SV-1                                                 | sp Q3TTE085.kda   | TRUE | 95%   | (INF)   | unknown | 12 | 0 |
| 1205 | TRUE | Empty | Septin-2 OS-Mus musculus GN-Sept2 PE-2 SV-1                                                                                                    | tr E9Q3V6.37.kda  | TRUE | 95%   | (INF)   | unknown | 14 | 0 |
| 1206 | TRUE | Empty | NAP7 domain-containing protein 3 OS-Mus musculus GN-Mag7d3 PE-2 SV-1                                                                           | sp A0A21498.kda   | 0%   | (0.8) | unknown | 5       | 6  |   |
| 1207 | TRUE | Empty | Dynactin subunit 1 OS-Mus musculus GN-Dctn1 PE-1 SV-3                                                                                          | sp Q08781842.kda  | 0%   | (0.8) | unknown | 3       | 4  |   |
| 1208 | TRUE | Empty | SUN1/SNF-related matrix-associated actin-dependent regulator of chromatin subfamily E member 1 OS-Mus musculus GN-Smarc1 PE-1 SV-1             | sp Q5494147.kda   | 0%   | (0.6) | unknown | 5       | 8  |   |
| 1209 | TRUE | Empty | Caerhien-2 OS-Mus musculus GN-Cah2 PE-1 SV-2                                                                                                   | sp F51116.100.kda | 0%   | (0.7) | unknown | 5       | 7  |   |
| 1210 | TRUE | Empty | V-type proton ATPase catalytic subunit A OS-Mus musculus GN-Atgpe1a PE-1 SV-2                                                                  | sp Q95161.68.kda  | 0%   | (0.6) | unknown | 5       | 8  |   |
| 1211 | TRUE | Empty | CDK-activating kinase assembly factor MAT1 OS-Mus musculus GN-Mmat1 PE-2 SV-2                                                                  | sp P51949.36.kda  | 0%   | (0.6) | unknown | 5       | 8  |   |
| 1212 | TRUE | Empty | V-type proton ATPase subunit B, brain isoform OS-Mus musculus GN-Atgpb1b2 PE-1 SV-1                                                            | sp P62814.57.kda  | 0%   | (1.8) | unknown | 7       | 4  |   |
| 1213 | TRUE | Empty | Zinc finger protein 800 OS-Mus musculus GN-Zf800 PE-1 SV-1                                                                                     | sp Q9VE1675.kda   | 0%   | (1.0) | unknown | 5       | 5  |   |
| 1214 | TRUE | Empty | Customer interaction phosphatase 2A 65 kDa regulatory subunit A alpha isoform OS-Mus musculus GN-Ppp2r1a PE-1 SV-3                             | sp Q70462.65.kda  | TRUE | 0%    | (1.0)   | unknown | 3  | 6 |
| 1215 | TRUE | Empty | Round spermatid basic protein 1 OS-Mus musculus GN-Rsb1 PE-1 SV-3                                                                              | sp Q8078699.kda   | 95%  | (0.5) | unknown | 3       | 6  |   |
| 1216 | TRUE | Empty | F-box like/WD repeat-containing protein TBL1XR1 OS-Mus musculus GN-Tbl1xr1 PE-2 SV-1                                                           | sp Q8BH8156.kda   | TRUE | 0%    | (0.8)   | unknown | 5  | 6 |
| 1217 | TRUE | Empty | Protein alpha OS-Mus musculus GN-Cpys PE-1 SV-2                                                                                                | sp Q8C1138.kda    | 0%   | (1.5) | unknown | 4       | 6  |   |
| 1218 | TRUE | Empty | Disintegrin and metalloprotease domain-containing protein 32 OS-Mus musculus GN-Adams32 PE-2 SV-3                                              | sp Q8K41084.kda   | 0%   | (0.7) | unknown | 5       | 7  |   |
| 1219 | TRUE | Empty | Nucleoporin p58/p45 OS-Mus musculus GN-Nup1 PE-1 SV-1                                                                                          | sp Q8R32259.kda   | 0%   | (0.8) | unknown | 5       | 6  |   |
| 1220 | TRUE | Empty | Nucleoporin NDC1 OS-Mus musculus GN-Ndc1 PE-2 SV-1                                                                                             | sp Q83V8175.kda   | 0%   | (0.7) | unknown | 4       | 6  |   |
| 1221 | TRUE | Empty | Cleavage stimulation factor subunit 1 OS-Mus musculus GN-Csf1 PE-1 SV-1                                                                        | sp Q9J9V7.83.kda  | 0%   | (0.8) | unknown | 5       | 6  |   |
| 1222 | TRUE | Empty | Superficial viral-cis activity 2 like 2 OS-Mus musculus GN-Skav22 PE-2 SV-1                                                                    | sp Q9CKU1133.kda  | 0%   | (0.8) | unknown | 3       | 4  |   |
| 1223 | TRUE | Empty | Ras-related protein Rab-18 OS-Mus musculus GN-Rab1b PE-1 SV-1                                                                                  | sp Q9D122.22.kda  | TRUE | 0%    | (1.5)   | unknown | 9  | 2 |
| 1224 | TRUE | Empty | MDRN repeat-containing protein 5 OS-Mus musculus GN-Morn5 PE-2 SV-1                                                                            | sp Q90A09.20.kda  | 0%   | (0.7) | unknown | 5       | 7  |   |
| 1225 | TRUE | Empty | High-mobility group protein 20A OS-Mus musculus GN-Hmg20a PE-2 SV-1                                                                            | sp Q9DC1340.kda   | 0%   | (0.6) | unknown | 8       | 4  |   |
| 1226 | TRUE | Empty | Desitin OS-Mus musculus GN-Dstin PE-1 SV-3                                                                                                     | sp Q9R0P919.kda   | 95%  | (2.0) | unknown | 8       | 4  |   |
| 1227 | TRUE | Empty | Poly A binding protein, cytoplasmic 2 OS-Mus musculus GN-Pabpc2 PE-2 SV-1                                                                      | tr Q92029.69.kda  | TRUE | 0%    | (1.0)   | unknown | 5  | 9 |
| 1228 | TRUE | Empty | Exportin 1 OS-Mus musculus GN-Xpo1 PE-1 SV-1                                                                                                   | sp Q9P597123.kda  | 0%   | (1.4) | unknown | 7       | 5  |   |
| 1229 | TRUE | Empty | UPO501 gene KIAA1330 OS-Mus musculus GN-Kiaa1330 PE-1 SV-2                                                                                     | sp Q929161.kda    | 0%   | (0.6) | unknown | 5       | 8  |   |
| 1230 | TRUE | Empty | Dihydropyridine-residue succinyltransferase component of 2-oxoglutarate dehydrogenase complex, mitochondrial OS-Mus musculus GN-Ddt1 PE-1 SV-1 | sp Q90262.49.kda  | 0%   | (1.8) | unknown | 7       | 4  |   |
| 1231 | TRUE | Empty | Splicing factor U2AF 35 kDa subunit OS-Mus musculus GN-U2af1 PE-1 SV-1                                                                         | sp Q9888238.kda   | 0%   | (0.8) | unknown | 3       | 4  |   |
| 1232 | TRUE | Empty | Pre-mRNA-processing factor 17 OS-Mus musculus GN-Cpk40 PE-1 SV-1                                                                               | sp Q9C94665.kda   | 0%   | (0.7) | unknown | 4       | 6  |   |
| 1233 | TRUE | Empty | Trichostin A OS-Mus musculus GN-Trichostin A PE-2 SV-2                                                                                         | sp Q99401.55.kda  | 0%   | (0.6) | unknown | 3       | 4  |   |
| 1234 | TRUE | Empty | X-ray radiation resistance-associated protein 1 OS-Mus musculus GN-Xrra1 PE-2 SV-1                                                             | sp Q9J3V9.89.kda  | 95%  | (0.3) | unknown | 2       | 6  |   |
| 1235 | TRUE | Empty | Importin subunit alpha OS-Mus musculus GN-Krpa6 PE-2 SV-1                                                                                      | tr Q9FJZ1.60.kda  | 0%   | (0.6) | unknown | 3       | 5  |   |
| 1236 | TRUE | Empty | Serratia RNA effector molecule homolog OS-Mus musculus GN-Srrf PE-1 SV-1                                                                       | sp Q9AM100.kda    | 0%   | (1.3) | unknown | 4       | 3  |   |
| 1237 | TRUE | Empty | Centrosomal protein of 120 kDa OS-Mus musculus GN-Cen20 PE-2 SV-1                                                                              | sp Q7T50113.kda   | 0%   | (0.8) | unknown | 2       | 7  |   |
| 1238 | TRUE | Empty | Dihydroxyacetone reductase SDR family member 7B OS-Mus musculus GN-Dhrs7b PE-2 SV-1                                                            | sp Q99147.35.kda  | 95%  | (0.3) | unknown | 2       | 6  |   |
| 1239 | TRUE | Empty | Peptide-N14(H)-acetyl-beta-glucosaminylasparagine amidase OS-Mus musculus GN-Nga1y1 PE-1 SV-2                                                  | sp Q9J781.74.kda  | 95%  | (3.5) | unknown | 7       | 2  |   |
| 1240 | TRUE | Empty | Transcription elongation factor 3 subunit H OS-Mus musculus GN-Setd3 PE-2 SV-1                                                                 | sp Q5283359.kda   | 95%  | (0.3) | unknown | 6       | 6  |   |
| 1241 | TRUE | Empty | Leucine-rich repeat-containing protein 36 OS-Mus musculus GN-Lrrc36 PE-2 SV-2                                                                  | sp Q3V0M84.kda    | 0%   | (0.8) | unknown | 3       | 4  |   |
| 1242 | TRUE | Empty | WD repeat-containing protein 64 OS-Mus musculus GN-Wdr64 PE-2 SV-1                                                                             | tr E9QM22124.kda  | 0%   | (0.6) | unknown | 3       | 5  |   |
| 1243 | TRUE | Empty | Protein Gm501 OS-Mus musculus GN-Gm501 PE-4 SV-1                                                                                               | tr D3V1V1.37.kda  | 0%   | (0.6) | unknown | 4       | 7  |   |
| 1244 | TRUE | Empty | Dihydril reductase family member 4 OS-Mus musculus GN-Dhrf4 PE-2 SV-1                                                                          | sp Q9V1V225.kda   | 0%   | (1.2) | unknown | 3       | 6  |   |
| 1245 | TRUE | Empty | Pumilio domain-containing protein KIAA0200 OS-Mus musculus GN-Kiaa0200 PE-2 SV-2                                                               | sp Q8882973.kda   | 95%  | (0.1) | unknown | 1       | 8  |   |
| 1246 | TRUE | Empty | Protein 1700001C198k OS-Mus musculus GN-1700001C198k PE-2 SV-1                                                                                 | tr E9Q6U5.13.kda  | 95%  | (0.4) | unknown | 4       | 10 |   |
| 1247 | TRUE | Empty | Clathrin light chain A OS-Mus musculus GN-Cla PE-2 SV-1                                                                                        | tr B1AWE023.kda   | 0%   | (0.6) | unknown | 3       | 5  |   |
| 1248 | TRUE | Empty | Maintenance of chromosomes protein 1A OS-Mus musculus GN-Smc1a PE-1 SV-4                                                                       | sp Q9C10143.kda   | 0%   | (0.6) | unknown | 1       | 6  |   |
| 1249 | TRUE | Empty | Scaffold attachment factor 82 OS-Mus musculus GN-Saf82 PE-1 SV-2                                                                               | sp Q8OYV512.kda   | TRUE | 95%   | (0.5)   | unknown | 2  | 6 |
| 1250 | TRUE | Empty | Ligand-dependent nuclear receptor-interacting factor 1 OS-Mus musculus GN-Lnrf1 PE-2 SV-2                                                      | sp Q8CD083.kda    | 95%  | (0.2) | unknown | 2       | 9  |   |
| 1251 | TRUE | Empty | AT-hook DNA-binding motif-containing protein 1 OS-Mus musculus GN-Ahac1 PE-1 SV-1                                                              | sp Q9PAP1.768.kda | 95%  | (0.3) | unknown | 2       | 6  |   |
| 1252 | TRUE | Empty | 26S proteasome non-ATPase regulatory subunit 1 core protein OS-Mus musculus GN-Hmgp2 PE-2 SV-1                                                 | sp B180C7.489.kda | 0%   | (0.6) | unknown | 3       | 5  |   |
| 1253 | TRUE | Empty | Dynamitin 2 OS-Mus musculus GN-Dnm2 PE-2 SV-1                                                                                                  | tr G1X9Q.498.kda  | 95%  | (4.0) | unknown | 4       | 1  |   |
| 1254 | TRUE | Empty | Coiled-coil domain-containing protein 38 OS-Mus musculus GN-Ccdc18 PE-2 SV-1                                                                   | sp Q640L5.170.kda | 0%   | (0.5) | unknown | 0       | 3  |   |
| 1255 | TRUE | Empty | Keratin, type II cytoskeletal 75 OS-Mus musculus GN-Krt75 PE-1 SV-1                                                                            | sp Q8RC2460.kda   | TRUE | 0%    | (1.6)   | unknown | 7  | 3 |
| 1256 | TRUE | Empty | Protein kinase 10 OS-Mus musculus GN-Htk10 PE-2 SV-1                                                                                           | sp Q8K212.45.kda  | 95%  | (0.0) | unknown | 6       | 6  |   |
| 1257 | TRUE | Empty | Protein mago nashi homolog OS-Mus musculus GN-Mago PE-2 SV-1                                                                                   | sp P61327.17.kda  | 0%   | (0.8) | unknown | 5       | 6  |   |
| 1258 | TRUE | Empty | Voltage-dependent anion-selective channel protein 1 OS-Mus musculus GN-Vdca1 PE-1 SV-3                                                         | sp Q961322.kda    | 0%   | (0.9) | unknown | 3       | 4  |   |
| 1259 | TRUE | Empty | Eukaryotic translation initiation factor 3 subunit H OS-Mus musculus GN-Eif3h PE-1 SV-1                                                        | sp Q91W40.40.kda  | 0%   | (0.6) | unknown | 3       | 5  |   |
| 1260 | TRUE | Empty | Bifunctional phosphatase/kinase OS-Mus musculus GN-Pkp PE-1 SV-2                                                                               | sp Q9C912.62.kda  | 0%   | (1.0) | unknown | 4       | 4  |   |
| 1261 | TRUE | Empty | Dimethyladenosine transferase 1, mitochondrial OS-Mus musculus GN-Tfmd1 PE-2 SV-1                                                              | sp Q8ZM.39.kda    | 95%  | (1.2) | unknown | 6       | 5  |   |
| 1262 | TRUE | Empty | Coiled-coil-helix-coiled-coil-helix domain-containing protein 3, mitochondrial OS-Mus musculus GN-Chchd3 PE-1 SV-1                             | sp Q9C8E26.kda    | 0%   | (0.7) | unknown | 4       | 6  |   |
| 1263 | TRUE | Empty | Cytochrome b-c1 complex subunit Rieske, mitochondrial OS-Mus musculus GN-Uqcrl1 PE-1 SV-1                                                      | sp Q9C46289.kda   | 0%   | (1.0) | unknown | 6       | 6  |   |
| 1264 | TRUE | Empty | 26S proteasome non-ATPase regulatory subunit 1 OS-Mus musculus GN-Psm1 PE-1 SV-1                                                               | sp Q9C292.62.kda  | 0%   | (1.2) | unknown | 2       | 4  |   |
| 1265 | TRUE | Empty | Predicted gene, EGZ1055 OS-Mus musculus GN-Gm763 PE-2 SV-1                                                                                     | tr Q9CFJ5.21.kda  | 0%   | (0.9) | unknown | 6       | 7  |   |
| 1266 | TRUE | Empty | Hepatoma-derived growth factor-related protein 2 OS-Mus musculus GN-Hdrgf2 PE-1 SV-1                                                           | sp Q3UM.74.kda    | TRUE | 0%    | (0.9)   | unknown | 8  | 3 |
| 1267 | TRUE | Empty | Ubiquitin-specific protease 1 OS-Mus musculus GN-Ubp1 PE-1 SV-1                                                                                | sp Q9C625160.kda  | 0%   | (1.0) | unknown | 3       | 3  |   |
| 1268 | TRUE | Empty | ATP-binding cassette sub-family E member 1 OS-Mus musculus GN-Abca1 PE-2 SV-1                                                                  | sp P61222.67.kda  | 0%   | (0.7) | unknown | 2       | 3  |   |
| 1269 | TRUE | Empty | Pre-mRNA-splicing factor RRM22 OS-Mus musculus GN-Rrm22 PE-2 SV-1                                                                              | sp Q8BH5147.kda   | 95%  | (0.5) | unknown | 3       | 6  |   |
| 1270 | TRUE | Empty | Nuclear pore complex protein Nup85 OS-Mus musculus GN-Nup85 PE-1 SV-1                                                                          | sp Q8R48675.kda   | 95%  | (0.4) | unknown | 3       | 7  |   |
| 1271 | TRUE | Empty | Inulin-like growth factor 2 mRNA-binding protein 3 OS-Mus musculus GN-Ing2bp3 PE-1 SV-1                                                        | sp Q9C9F64.kda    | 95%  | (0.8) | unknown | 4       | 5  |   |
| 1272 | TRUE | Empty | DnaJ homolog subfamily B member 2 OS-Mus musculus GN-Dnajb2 PE-2 SV-2                                                                          | sp Q9QV8.36.kda   | TRUE | 0%    | (0.6)   | unknown | 7  | 4 |
| 1273 | TRUE | Empty | 1700047P138k protein OS-Mus musculus GN-1700047P138k PE-2 SV-1                                                                                 | tr Q909G728.kda   | 0%   | (1.0) | unknown | 5       | 5  |   |
| 1274 | TRUE | Empty | Replication protein A 70 kDa DNA-binding subunit OS-Mus musculus GN-Rpa1 PE-2 SV-1                                                             | sp Q8VE449.kda    | 95%  | (0.4) | unknown | 2       | 5  |   |
| 1275 | TRUE | Empty | Protein kinase 39 OS-Mus musculus GN-Htk39 PE-2 SV-1                                                                                           | sp Q701643.kda    | 0%   | (0.6) | unknown | 2       | 6  |   |
| 1276 | TRUE | Empty | Cleavage stimulation factor subunit 2 tau variant OS-Mus musculus GN-Cst2 PE-1 SV-2                                                            | sp Q8C7E96.kda    | TRUE | 95%   | (0.4)   | unknown | 3  | 7 |
| 1277 | TRUE | Empty | Uncharacterized protein C17orf98 homolog OS-Mus musculus PE-2 SV-1                                                                             | sp Q9DAQ.18.kda   | 95%  | (0.4) | unknown | 3       | 7  |   |
| 1278 | TRUE | Empty | Intracellular hyaluronan-binding protein 4 OS-Mus musculus GN-Habp4 PE-2 SV-2                                                                  | sp Q9K52.46.kda   | 0%   | (0.8) | unknown | 5       | 6  |   |
| 1279 | TRUE | Empty | E3 ubiquitin-protein ligase NAD1 OS-Mus musculus GN-Nad1 PE-1 SV-1                                                                             | sp E9Q292.62.kda  | 0%   | (1.2) | unknown | 6       | 5  |   |
| 1280 | TRUE | Empty | Detached in zebrafish-like OS-Mus musculus GN-Daf1 PE-1 SV-1                                                                                   | sp Q8A36833.kda   | 0%   | (1.2) | unknown | 6       | 5  |   |
| 1281 | TRUE | Empty | NADH dehydrogenase [ubiquinone] 1 alpha subcomplex subunit 8 OS-Mus musculus GN-Ndufa8 PE-1 SV-3                                               | sp Q9C5C20.kda    | 0%   | (1.5) | unknown | 6       | 4  |   |
| 1282 | TRUE | Empty | Leucine zipper transcription factor-like protein 1 OS-Mus musculus GN-Lztf1 PE-2 SV-1                                                          | sp Q9H0235.kda    | 0%   | (1.2) | unknown | 5       | 4  |   |
| 1283 | TRUE | Empty | Actin-dependent neuroprotection homeobox protein OS-Mus musculus GN-Ahnep PE-3 SV-1                                                            | sp A3B000.12.kda  | 0%   | (0.7) | unknown | 2       | 4  |   |
| 1284 | TRUE | Empty | Rab11 family-interacting protein 1 OS-Mus musculus GN-Rab11fp1 PE-1 SV-1                                                                       | sp Q90G271.kda    | TRUE | 0%    | (0.8)   | unknown | 5  | 4 |
| 1285 | TRUE | Empty | Guanine nucleotide-binding protein-like 3 OS-Mus musculus GN-Gnl3 PE-1 SV-2                                                                    | sp Q8C11.61.kda   | 95%  | (0.4) | unknown | 3       | 7  |   |
| 1286 | TRUE | Empty | Cyclin-dependent kinase 2 OS-Mus musculus GN-Cdk2 PE-1 SV-2                                                                                    | sp P37377.39.kda  | TRUE | 0%    | (1.3)   | unknown | 4  | 3 |
| 1287 | TRUE | Empty | Trichostin growth factor 2 mRNA-binding protein 1 OS-Mus musculus GN-Ing2bp1 PE-1 SV-1                                                         | sp Q8K4176.kda    | 0%   | (0.6) | unknown | 4       | 3  |   |
| 1288 | TRUE | Empty | Protein Ahs2r11 OS-Mus musculus GN-Ahs2r11 PE-2 SV-1                                                                                           | tr E9Q152.63.kda  | 95%  | (2.0) | unknown | 1       | 4  |   |
| 1289 | TRUE | Empty | Sphingosine 1-phosphate lyase 1 OS-Mus musculus GN-Sgpl1 PE-2 SV-1                                                                             | sp Q8R0764.kda    | 95%  | (3.5) | unknown | 7       | 2  |   |
| 1290 | TRUE | Empty | Luc7-like protein 3 OS-Mus musculus GN-Luc7l3 PE-1 SV-1                                                                                        | sp Q5SU251.kda    | 95%  | (0.4) | unknown | 6       | 6  |   |
| 1291 | TRUE | Empty | DNA-directed RNA polymerase 1 subunit PRB2 OS-Mus musculus GN-Polr2 PE-2 SV-1                                                                  | sp Q9PM461.kda    | 0%   | (1.0) | unknown | 3       | 3  |   |
| 1292 | TRUE | Empty | KT2 OS-Mus musculus GN-Cmk2ip2 PE-2 SV-1                                                                                                       | tr Q8H19.30.kda   | 95%  | (0.5) | unknown | 2       | 4  |   |
| 1293 | TRUE | Empty | LEM domain-containing protein 2 OS-Mus musculus GN-Lemf2 PE-1 SV-1                                                                             | sp Q9GV458.kda    | 95%  | (0.4) | unknown | 2       | 5  |   |
| 1294 | TRUE | Empty | Hemoglobin OS-Mus musculus GN-Hemg PE-2 SV-1                                                                                                   | sp Q9R0255.kda    | 0%   | (0.6) | unknown | 4       | 7  |   |
| 1295 | TRUE | Empty | Cyclin-dependent kinase-like 3 OS-Mus musculus GN-Cdk3 PE-2 SV-2                                                                               | sp Q8B47268.kda   | 95%  | (0.3) | unknown | 1       | 3  |   |
| 1296 | TRUE | Empty | Dihydropyrimidine-related protein 3 OS-Mus musculus GN-Dppd3 PE-2 SV-1                                                                         | tr Q3T72.72.kda   | 95%  | (4.0) | unknown | 4       | 1  |   |
| 1297 | TRUE | Empty | Tubulin beta-4A chain OS-Mus musculus GN-Tubb4 PE-1 SV-3                                                                                       | sp Q9D6F50.kda    | TRUE | 0%    | (1.0)   | unknown | 3  | 8 |
| 1298 | TRUE | Empty | Thymocyte nuclear protein 1 OS-Mus musculus GN-Thnp1 PE-1 SV-1                                                                                 | sp Q91V13.26.kda  | 95%  | (0.5) | unknown | 1       | 2  |   |
| 1299 | TRUE | Empty | E3 ubiquitin-protein ligase HERC2 OS-Mus musculus GN-Herc2 PE-1 SV-3                                                                           | sp Q4UZ21527.kda  | 95%  | (0.5) | unknown | 1       | 2  |   |
| 1300 | TRUE | Empty | Melanoma-associated antigen G1 OS-Mus musculus GN-Ndn2 PE-1 SV-1                                                                               | sp Q9C9R831.kda   | 0%   | (0.8) | unknown |         |    |   |

|      |      |       |                                                                                                                                  |                     |           |           |         |    |    |
|------|------|-------|----------------------------------------------------------------------------------------------------------------------------------|---------------------|-----------|-----------|---------|----|----|
| 1338 | TRUE | Empty | Uncharacterized protein Csof48 homolog OS-Mus musculus PE-2 SV-2                                                                 | sp Q09091 16 kDa    | 95% (0.4) | unknown   | 3       | 8  |    |
| 1339 | TRUE | Empty | E3 ubiquitin-protein ligase TRIM9 OS-Mus musculus GN-Trim9 PE-1 SV-1                                                             | sp Q0805657 6 kDa   | 0% (1.0)  | unknown   | 4       | 4  |    |
| 1340 | TRUE | Empty | MCS500 OS-Mus musculus GN-Myl2a PE-2 SV-1                                                                                        | sp Q263020 6 kDa    | TRUE      | 0% (0.7)  | unknown | 4  | 5  |
| 1341 | TRUE | Empty | Catenin alpha-1 OS-Mus musculus GN-Cttna1 PE-1 SV-1                                                                              | sp P26231 100 kDa   | TRUE      | 95% (0.3) | unknown | 1  | 6  |
| 1342 | TRUE | Empty | Probable ATP-dependent RNA helicase DDX2 OS-Mus musculus GN-Ddx27 PE-1 SV-3                                                      | sp Q02186 6 kDa     | TRUE      | 95% (0.2) | unknown | 1  | 4  |
| 1343 | TRUE | Empty | THO complex subunit 5 homolog OS-Mus musculus GN-THO5 PE-2 SV-2                                                                  | sp Q0807779 6 kDa   | TRUE      | 95% (0.4) | unknown | 3  | 8  |
| 1344 | TRUE | Empty | Nucleoside monophosphate adenyltransferase 1 OS-Mus musculus GN-Nmt1 PE-1 SV-2                                                   | sp Q0594372 6 kDa   | TRUE      | 0% (1.0)  | unknown | 3  | 3  |
| 1345 | TRUE | Empty | Protein Dnajc21 OS-Mus musculus GN-Dnajc21 PE-2 SV-1                                                                             | tr E090820 62 kDa   | TRUE      | 95% (2.0) | unknown | 4  | 2  |
| 1346 | TRUE | Empty | Cingulin-like 1 OS-Mus musculus GN-Cgln1 PE-2 SV-1                                                                               | tr B295U6 148 kDa   | TRUE      | 95% (2.0) | unknown | 4  | 2  |
| 1347 | TRUE | Empty | Proteasome assembly chaperone 1 OS-Mus musculus GN-Pmpg1 PE-2 SV-1                                                               | tr Q12975 31 kDa    | TRUE      | 95% (0.2) | unknown | 1  | 6  |
| 1348 | TRUE | Empty | Protein Pdm2 OS-Mus musculus GN-Pdm2 PE-2 SV-1                                                                                   | tr A276785 187 kDa  | TRUE      | 0% (1.0)  | unknown | 2  | 2  |
| 1349 | TRUE | Empty | Uncharacterized protein C20orf85 homolog OS-Mus musculus PE-2 SV-2                                                               | sp Q0904416 6 kDa   | TRUE      | 0% (1.7)  | unknown | 5  | 3  |
| 1350 | TRUE | Empty | AP-2 complex subunit sigma OS-Mus musculus GN-App21 PE-1 SV-1                                                                    | sp P2743 17 kDa     | TRUE      | 0% (1.5)  | unknown | 3  | 2  |
| 1351 | TRUE | Empty | Protein CS300B179k OS-Mus musculus GN-CS300B179k PE-4 SV-1                                                                       | sp Q05237 143 kDa   | TRUE      | 95% (0.1) | unknown | 1  | 8  |
| 1352 | TRUE | Empty | Activator of 90 kDa heat shock protein ATPase homolog 1 OS-Mus musculus GN-Aha1 PE-2 SV-2                                        | sp Q0884438 6 kDa   | TRUE      | 0% (1.7)  | unknown | 5  | 3  |
| 1353 | TRUE | Empty | Probable ATP-dependent RNA helicase DDX6 OS-Mus musculus GN-Ddx6 PE-1 SV-2                                                       | sp Q05625 117 kDa   | TRUE      | 95% (0.0) | unknown | 0  | 2  |
| 1354 | TRUE | Empty | Alstrom syndrome protein 1 homolog OS-Mus musculus GN-ALM1 PE-1 SV-2                                                             | sp Q0846360 6 kDa   | TRUE      | 95% (0.2) | unknown | 1  | 4  |
| 1355 | TRUE | Empty | SWI5-related matrix-associated actin-dependent regulator of centromere subfamily B member 1 OS-Mus musculus GN-Smarcb1 PE-1 SV-1 | sp Q0201444 6 kDa   | TRUE      | 95% (0.2) | unknown | 1  | 6  |
| 1356 | TRUE | Empty | WD repeat-containing protein 3 OS-Mus musculus GN-Wdr3 PE-2 SV-1                                                                 | sp Q089H 106 kDa    | TRUE      | 95% (0.2) | unknown | 1  | 4  |
| 1357 | TRUE | Empty | Cleavage and polyadenylation specificity factor subunit 5 OS-Mus musculus GN-Nud21 PE-2 SV-1                                     | sp Q05CF26 6 kDa    | TRUE      | 95% (0.0) | unknown | 0  | 3  |
| 1358 | TRUE | Empty | Ret-related protein Rab-1A OS-Mus musculus GN-Rab1A PE-1 SV-3                                                                    | sp P2821 23 kDa     | TRUE      | 0% (1.1)  | unknown | 1  | 7  |
| 1359 | TRUE | Empty | Tricardine protein OS-Mus musculus GN-Trc1 PE-1 SV-1                                                                             | sp Q08784155 6 kDa  | TRUE      | 95% (0.2) | unknown | 1  | 6  |
| 1360 | TRUE | Empty | Testis-expressed sequence 26 protein OS-Mus musculus GN-Tex26 PE-1 SV-1                                                          | sp Q00V8235 6 kDa   | TRUE      | 95% (0.2) | unknown | 1  | 6  |
| 1361 | TRUE | Empty | 45 kDa calcium-binding protein OS-Mus musculus GN-Sfr4 PE-2 SV-1                                                                 | sp Q0111242 6 kDa   | TRUE      | 95% (0.0) | unknown | 0  | 1  |
| 1362 | TRUE | Empty | Nucleoporin NUP53 OS-Mus musculus GN-Nup53 PE-1 SV-1                                                                             | sp Q0848635 6 kDa   | TRUE      | 95% (0.2) | unknown | 2  | 8  |
| 1363 | TRUE | Empty | Insect-like peptide INS4 OS-Mus musculus GN-Ins4 PE-2 SV-1                                                                       | sp Q090V22 6 kDa    | TRUE      | 95% (0.0) | unknown | 0  | 6  |
| 1364 | TRUE | Empty | Mitochondrial import receptor subunit TOM70 OS-Mus musculus GN-Tomm70a PE-1 SV-2                                                 | sp Q05C2V 68 kDa    | TRUE      | 95% (INF) | unknown | 5  | 0  |
| 1365 | TRUE | Empty | Serine/threonine-protein phosphatase 1 regulatory subunit 10 OS-Mus musculus GN-Ppp1r10 PE-1 SV-1                                | sp Q080W0 94 kDa    | TRUE      | 95% (0.0) | unknown | 0  | 6  |
| 1366 | TRUE | Empty | Leucine-rich repeat and calponin homology domain-containing protein 1 OS-Mus musculus GN-Lrch3 PE-2 SV-3                         | sp Q08V0186 6 kDa   | TRUE      | 95% (INF) | unknown | 12 | 0  |
| 1367 | TRUE | Empty | Tain-2 OS-Mus musculus GN-Tain2 PE-4 SV-1                                                                                        | tr E091A427 6 kDa   | TRUE      | 0% (1.0)  | unknown | 0  | 0  |
| 1368 | TRUE | Empty | Tropomyosin alpha-1 chain OS-Mus musculus GN-Tpm1 PE-2 SV-1                                                                      | tr E094545 29 kDa   | TRUE      | 95% (INF) | unknown | 12 | 0  |
| 1369 | TRUE | Empty | Tropomyosin 1, alpha, isoform CRA_1 OS-Mus musculus GN-Tpm1 PE-2 SV-1                                                            | tr E05882 29 kDa    | TRUE      | 95% (0.0) | unknown | 0  | 10 |
| 1370 | TRUE | Empty | E3 ubiquitin-protein ligase TRIM1 OS-Mus musculus GN-Trim1 PE-1 SV-1                                                             | sp Q0801554 6 kDa   | TRUE      | 0% (0.8)  | unknown | 6  | 6  |
| 1371 | TRUE | Empty | CAP-Gly domain-containing linker protein 4 OS-Mus musculus GN-Cglp4 PE-1 SV-1                                                    | sp Q05C85 76 kDa    | TRUE      | 0% (0.8)  | unknown | 4  | 5  |
| 1372 | TRUE | Empty | Sideroflexin-3 OS-Mus musculus GN-Sfx3 PE-1 SV-1                                                                                 | sp Q01V6135 6 kDa   | TRUE      | 0% (1.5)  | unknown | 6  | 4  |
| 1373 | TRUE | Empty | Uncharacterized protein Csof49 homolog OS-Mus musculus PE-1 SV-1                                                                 | sp Q090AR21 6 kDa   | TRUE      | 0% (0.8)  | unknown | 4  | 5  |
| 1374 | TRUE | Empty | Protein Gm14 OS-Mus musculus GN-Gm14 PE-2 SV-1                                                                                   | tr A189H 26 kDa     | TRUE      | 0% (1.2)  | unknown | 6  | 5  |
| 1375 | TRUE | Empty | Protein Btaf1 OS-Mus musculus GN-Btaf1 PE-2 SV-1                                                                                 | tr E042C 137 kDa    | TRUE      | 0% (1.0)  | unknown | 5  | 5  |
| 1376 | TRUE | Empty | Protein 1110017D15Rk (Fragment) OS-Mus musculus GN-1110017D15Rk PE-4 SV-1                                                        | tr F7CU2 25 kDa     | TRUE      | 0% (0.6)  | unknown | 6  | 6  |
| 1377 | TRUE | Empty | Acp1 protein OS-Mus musculus GN-Acp1 PE-2 SV-1                                                                                   | tr Q01G1118 6 kDa   | TRUE      | 0% (1.2)  | unknown | 6  | 5  |
| 1378 | TRUE | Empty | PKS domain-containing serine/threonine-protein kinase OS-Mus musculus GN-Pnk PE-2 SV-3                                           | sp Q08216512 6 kDa  | TRUE      | 0% (0.8)  | unknown | 3  | 1  |
| 1379 | TRUE | Empty | Protein A8 (Fragment) OS-Mus musculus GN-A8 PE-4 SV-1                                                                            | tr G1U250 61 kDa    | TRUE      | 0% (0.8)  | unknown | 4  | 5  |
| 1380 | TRUE | Empty | Ubiquitin-conjugating enzyme E2 L3 OS-Mus musculus GN-Ube2l3 PE-2 SV-1                                                           | sp P68037 18 kDa    | TRUE      | 0% (0.8)  | unknown | 3  | 4  |
| 1381 | TRUE | Empty | DNA polymerase beta OS-Mus musculus GN-Polb PE-2 SV-3                                                                            | sp Q0840938 6 kDa   | TRUE      | 0% (1.7)  | unknown | 5  | 3  |
| 1382 | TRUE | Empty | Cytosine deaminase, mitochondrial OS-Mus musculus GN-Cda1 PE-2 SV-3                                                              | sp Q02011 51 kDa    | TRUE      | 0% (0.8)  | unknown | 3  | 4  |
| 1383 | TRUE | Empty | Peptidyl-prolyl cis-trans isomerase NIMA-interacting 1 OS-Mus musculus GN-Ppil1 PE-1 SV-1                                        | sp Q05QUK 18 kDa    | TRUE      | 0% (1.0)  | unknown | 5  | 5  |
| 1384 | TRUE | Empty | Sterile alpha motif domain-containing protein 15 OS-Mus musculus GN-Samf15 PE-4 SV-2                                             | tr F6XZ7 70 kDa     | TRUE      | 0% (0.6)  | unknown | 3  | 5  |
| 1385 | TRUE | Empty | Vacuolar protein sorting-associated protein 13A OS-Mus musculus GN-Vps13a PE-1 SV-1                                              | sp Q05H8C395 6 kDa  | TRUE      | 0% (0.8)  | unknown | 3  | 4  |
| 1386 | TRUE | Empty | U6 snRNP-associated protein 1 OS-Mus musculus GN-U6ap1 PE-1 SV-2                                                                 | sp Q05482113 6 kDa  | TRUE      | 95% (0.0) | unknown | 2  | 7  |
| 1387 | TRUE | Empty | Fascin-3 OS-Mus musculus GN-Fscn3 PE-2 SV-2                                                                                      | sp Q05QW56 6 kDa    | TRUE      | 0% (1.0)  | unknown | 3  | 3  |
| 1388 | TRUE | Empty | Thioredoxin domain-containing protein 3 OS-Mus musculus GN-Nme8 PE-2 SV-1                                                        | sp Q0175107 6 kDa   | TRUE      | 0% (0.7)  | unknown | 2  | 3  |
| 1389 | TRUE | Empty | Actin-like protein 1 OS-Mus musculus GN-Actl10 PE-3 SV-1                                                                         | sp A2AKT 38 kDa     | TRUE      | 95% (0.4) | unknown | 3  | 8  |
| 1390 | TRUE | Empty | Chromatin-associated protein kinase catalytic subunit alpha OS-Mus musculus GN-Prkaa PE-1 SV-3                                   | sp P01512 97 kDa    | TRUE      | 95% (0.1) | unknown | 3  | 7  |
| 1391 | TRUE | Empty | Transcription factor BTF3 OS-Mus musculus GN-Btf3 PE-2 SV-3                                                                      | sp Q0415222 6 kDa   | TRUE      | 95% (0.4) | unknown | 3  | 7  |
| 1392 | TRUE | Empty | ATP-dependent RNA helicase DDX18 OS-Mus musculus GN-Ddx18 PE-2 SV-1                                                              | sp Q083K374 6 kDa   | TRUE      | 95% (0.4) | unknown | 3  | 7  |
| 1393 | TRUE | Empty | Protein SEC13 homolog OS-Mus musculus GN-Sec13 PE-2 SV-3                                                                         | sp Q05D14 36 kDa    | TRUE      | 95% (0.3) | unknown | 6  | 6  |
| 1394 | TRUE | Empty | COP9 signalosome complex subunit 4 OS-Mus musculus GN-Cop4 PE-1 SV-1                                                             | sp Q0844446 6 kDa   | TRUE      | 95% (0.4) | unknown | 2  | 5  |
| 1395 | TRUE | Empty | U1 small nuclear ribonucleoprotein 70 kDa OS-Mus musculus GN-Smp70 PE-1 SV-2                                                     | sp Q0237652 6 kDa   | TRUE      | 0% (1.7)  | unknown | 5  | 3  |
| 1396 | TRUE | Empty | Serine/threonine-protein phosphatase 2A 65 kDa regulatory subunit A beta isoform OS-Mus musculus GN-Ppp2r1b PE-1 SV-2            | sp Q077M566 6 kDa   | TRUE      | 0% (0.7)  | unknown | 3  | 6  |
| 1397 | TRUE | Empty | E2 ubiquitin-protein ligase TRIM1 OS-Mus musculus GN-Trim1 PE-1 SV-1                                                             | sp Q05041 27 kDa    | TRUE      | 0% (0.8)  | unknown | 3  | 1  |
| 1398 | TRUE | Empty | Coiled-coil domain-containing protein 11A OS-Mus musculus GN-Ccdc11A PE-2 SV-1                                                   | sp Q01K0274 6 kDa   | TRUE      | 0% (1.0)  | unknown | 3  | 3  |
| 1399 | TRUE | Empty | Cancer-related nucleoside-triphosphatase homolog OS-Mus musculus GN-Ntppc PE-2 SV-1                                              | sp Q05A021 6 kDa    | TRUE      | 0% (1.0)  | unknown | 4  | 4  |
| 1400 | TRUE | Empty | 4934343C119k protein OS-Mus musculus GN-4934343C119k PE-2 SV-1                                                                   | tr A2R5K 35 kDa     | TRUE      | 95% (0.3) | unknown | 2  | 6  |
| 1401 | TRUE | Empty | Trochocytin c1 complex subunit 8 OS-Mus musculus GN-Tc1c PE-2 SV-3                                                               | sp Q05D94 36 kDa    | TRUE      | 0% (1.2)  | unknown | 3  | 2  |
| 1402 | TRUE | Empty | Uncharacterized protein C2orf65 homolog OS-Mus musculus PE-2 SV-1                                                                | sp Q05DAG 28 kDa    | TRUE      | 0% (0.7)  | unknown | 4  | 6  |
| 1403 | TRUE | Empty | Heterogeneous nuclear ribonucleoprotein A1 OS-Mus musculus GN-HnRnpA1 PE-1 SV-2                                                  | sp A49312 34 kDa    | TRUE      | 0% (1.0)  | unknown | 6  | 6  |
| 1404 | TRUE | Empty | U6 snRNP-associated Sm-like protein Lsm3 OS-Mus musculus GN-Lsm3 PE-3 SV-2                                                       | sp Q02311 12 kDa    | TRUE      | 0% (0.8)  | unknown | 3  | 4  |
| 1405 | TRUE | Empty | Protein Scrb1 OS-Mus musculus GN-Scrb1 PE-1 SV-2                                                                                 | sp Q08U7217 6 kDa   | TRUE      | 0% (0.8)  | unknown | 3  | 1  |
| 1406 | TRUE | Empty | Nucleolar protein 8 OS-Mus musculus GN-No8 PE-1 SV-2                                                                             | sp Q01N0H 129 kDa   | TRUE      | 95% (0.1) | unknown | 1  | 7  |
| 1407 | TRUE | Empty | IQ and AAA domain-containing protein 1-like OS-Mus musculus GN-Iqca1p1 PE-2 SV-3                                                 | sp A06H9096 6 kDa   | TRUE      | 95% (0.2) | unknown | 1  | 6  |
| 1408 | TRUE | Empty | Protein boule-like (Fragment) OS-Mus musculus GN-Boll PE-2 SV-1                                                                  | tr G1UYE 31 kDa     | TRUE      | 0% (0.8)  | unknown | 3  | 4  |
| 1409 | TRUE | Empty | Protein associated gene 1 protein homolog OS-Mus musculus GN-Capel PE-1 SV-2                                                     | sp P01512 97 kDa    | TRUE      | 95% (0.1) | unknown | 3  | 7  |
| 1410 | TRUE | Empty | Glia maturation factor beta OS-Mus musculus GN-Gmfb PE-1 SV-3                                                                    | sp Q05CQ1 17 kDa    | TRUE      | 0% (0.7)  | unknown | 2  | 3  |
| 1411 | TRUE | Empty | 39S ribosomal protein L16, mitochondrial OS-Mus musculus GN-Mrpl16 PE-2 SV-1                                                     | sp Q099N29 29 kDa   | TRUE      | 0% (1.0)  | unknown | 2  | 2  |
| 1412 | TRUE | Empty | Ankyrin repeat and SOCS box protein 3 OS-Mus musculus GN-Akbp3 PE-2 SV-2                                                         | sp Q05L7R32 6 kDa   | TRUE      | 95% (0.3) | unknown | 2  | 7  |
| 1413 | TRUE | Empty | Leucine-rich repeat-containing protein 46 OS-Mus musculus GN-Lrch46 PE-2 SV-2                                                    | sp Q05D94 36 kDa    | TRUE      | 0% (1.7)  | unknown | 3  | 2  |
| 1414 | TRUE | Empty | ATP-binding cassette sub-family D member 3 OS-Mus musculus GN-Abcd3 PE-1 SV-2                                                    | sp P05095 75 kDa    | TRUE      | 95% (0.2) | unknown | 1  | 4  |
| 1415 | TRUE | Empty | Translin-associated factor X-interacting protein 1 OS-Mus musculus GN-Tnaixp1 PE-1 SV-2                                          | sp Q09P2582 6 kDa   | TRUE      | 95% (0.3) | unknown | 1  | 3  |
| 1416 | TRUE | Empty | Rho GTPase-activating protein 29 OS-Mus musculus GN-Rga29 PE-1 SV-1                                                              | sp Q05G1342 6 kDa   | TRUE      | 95% (0.2) | unknown | 1  | 4  |
| 1417 | TRUE | Empty | Protein serine carboxypeptidase CPL1 OS-Mus musculus GN-Cpl1 PE-2 SV-1                                                           | sp Q05D3555 6 kDa   | TRUE      | 0% (1.5)  | unknown | 3  | 2  |
| 1418 | TRUE | Empty | Protein Gm1527 OS-Mus musculus GN-Gm1527 PE-2 SV-1                                                                               | tr B1AVZ5 53 kDa    | TRUE      | 0% (1.0)  | unknown | 1  | 1  |
| 1419 | TRUE | Empty | E3 ubiquitin-protein ligase TRIM17 OS-Mus musculus GN-Trim17 PE-2 SV-1                                                           | sp Q077PW 55 kDa    | TRUE      | 95% (0.0) | unknown | 0  | 6  |
| 1420 | TRUE | Empty | Trill protein OS-Mus musculus GN-Trill PE-1 SV-1                                                                                 | sp A124A2 213 kDa   | TRUE      | 95% (0.0) | unknown | 4  | 4  |
| 1421 | TRUE | Empty | Pseudouridine-5'-monophosphatase OS-Mus musculus GN-Hmbd1 PE-2 SV-1                                                              | sp Q05D9126 6 kDa   | TRUE      | 0% (0.6)  | unknown | 3  | 5  |
| 1422 | TRUE | Empty | Importin subunit alpha-3 OS-Mus musculus GN-Kpn4 PE-2 SV-1                                                                       | sp Q0354358 6 kDa   | TRUE      | 0% (0.6)  | unknown | 3  | 5  |
| 1423 | TRUE | Empty | Ribosome biogenesis protein BOP1 OS-Mus musculus GN-Bop1 PE-1 SV-1                                                               | sp P7452 83 kDa     | TRUE      | 95% (0.2) | unknown | 1  | 5  |
| 1424 | TRUE | Empty | Acy carrier protein, mitochondrial OS-Mus musculus GN-Hmbd1 PE-1 SV-1                                                            | sp Q05C2117 6 kDa   | TRUE      | 0% (1.4)  | unknown | 7  | 5  |
| 1425 | TRUE | Empty | Paired amphipathic helix protein Slnb3 OS-Mus musculus GN-Slnb3 PE-1 SV-2                                                        | sp Q02144126 6 kDa  | TRUE      | 95% (0.0) | unknown | 0  | 7  |
| 1426 | TRUE | Empty | Keratin, type II cytoskeletal 79 OS-Mus musculus GN-Krt79 PE-1 SV-2                                                              | sp Q08VE058 6 kDa   | TRUE      | 0% (0.8)  | unknown | 5  | 6  |
| 1427 | TRUE | Empty | Parafibrin OS-Mus musculus GN-Cc73 PE-2 SV-1                                                                                     | sp Q08ZM161 6 kDa   | TRUE      | 95% (0.0) | unknown | 0  | 7  |
| 1428 | TRUE | Empty | RNA and actin-binding protein OS-Mus musculus GN-Trfbp PE-2 SV-1                                                                 | sp E058AC 72 kDa    | TRUE      | 0% (0.8)  | unknown | 2  | 1  |
| 1429 | TRUE | Empty | Inner centromere protein OS-Mus musculus GN-Incep PE-1 SV-2                                                                      | sp Q05WU6101 6 kDa  | TRUE      | 95% (0.0) | unknown | 0  | 3  |
| 1430 | TRUE | Empty | Sarcolemmal membrane-associated protein OS-Mus musculus GN-Slmap PE-1 SV-2                                                       | sp Q3URD 97 kDa     | TRUE      | 95% (INF) | unknown | 8  | 0  |
| 1431 | TRUE | Empty | 492151C08Rk protein OS-Mus musculus GN-Vwa8a PE-2 SV-1                                                                           | tr E01907 45 kDa    | TRUE      | 95% (0.0) | unknown | 0  | 9  |
| 1432 | TRUE | Empty | Keratin, type I cytoskeletal 12 OS-Mus musculus GN-Krt19 PE-1 SV-1                                                               | sp P01001 45 kDa    | TRUE      | 95% (0.0) | unknown | 5  | 3  |
| 1433 | TRUE | Empty | Glypican 4 OS-Mus musculus GN-Gpc4 PE-2 SV-2                                                                                     | sp P15155 63 kDa    | TRUE      | 0% (1.7)  | unknown | 5  | 3  |
| 1434 | TRUE | Empty | Serine/threonine-protein kinase Utk4 OS-Mus musculus GN-Utk4 PE-2 SV-2                                                           | sp Q01V125145 6 kDa | TRUE      | 0% (0.6)  | unknown | 3  | 4  |
| 1435 | TRUE | Empty | N-acetylneuraminase cytidylyltransferase OS-Mus musculus GN-Nact PE-1 SV-2                                                       | sp Q09X248 6 kDa    | TRUE      | 0% (1.0)  | unknown | 4  | 5  |
| 1436 | TRUE | Empty | Protein 1700023F0Rk OS-Mus musculus GN-1700023F0Rk PE-2 SV-1                                                                     | sp E018A62 42 kDa   | TRUE      | 95% (0.0) | unknown | 3  | 1  |
| 1437 | TRUE | Empty | CDSH iron-sulfur domain-containing protein 1 OS-Mus musculus GN-Cdsh PE-1 SV-1                                                   | sp Q019W5 12 kDa    | TRUE      | 0% (1.7)  | unknown | 5  | 3  |
| 1438 | TRUE | Empty | Guanine nucleotide-binding protein (G) subunit alpha 2 OS-Mus musculus GN-Gnal2 PE-1 SV-5                                        | sp P08752 40 kDa    | TRUE      | 0% (0.8)  | unknown | 4  | 5  |
| 1439 | TRUE | Empty | Protein Ddb4 OS-Mus musculus GN-Ddb4 PE-3 SV-1                                                                                   | tr Q120P9 72 kDa    | TRUE      | 95% (2.0) | unknown | 4  | 2  |
| 1440 | TRUE | Empty | Eukaryotic translation initiation factor 1 OS-Mus musculus GN-Eif1 PE-2 SV-2                                                     | sp P08021 63 kDa    | TRUE      | 95% (0.0) | unknown | 3  | 5  |
| 1441 | TRUE | Empty | Probable inactive serine protease 37 OS-Mus musculus GN-Pr37 PE-2 SV-1                                                           | sp Q090AA 27 kDa    | TRUE      | 0% (0.8)  | unknown | 3  | 4  |
| 1442 | TRUE | Empty | Pho1 finger-like domain-containing protein 5A OS-Mus musculus GN-Pfl5a PE-1 SV-1                                                 | sp P68370 12 kDa    | TRUE      | 0% (1.3)  | unknown | 4  | 3  |
| 1443 | TRUE | Empty | Transcription factor E3 OS-Mus musculus GN-Trf3 PE-1 SV-1                                                                        | sp Q0540263 6 kDa   | TRUE      | 0% (0.6)  | unknown | 5  | 5  |
| 1444 | TRUE | Empty | U4U5 small nuclear ribonucleoprotein Pp21 OS-Mus musculus GN-Pp21 PE-1 SV-3                                                      | sp Q08CC7055 6 kDa  | TRUE      | 0% (1.0)  | unknown | 4  | 4  |
| 1445 | TRUE | Empty | Borealin OS-Mus musculus GN-Cdc48 PE-2 SV-2                                                                                      | sp Q08HK32 6 kDa    | TRUE      | 95% (0.5) | unknown | 2  | 4  |
| 1446 | TRUE | Empty | Protein Chk5 OS-Mus musculus GN-Chk5 PE-2 SV-1                                                                                   | tr E9PYU 219 kDa    | TRUE      | 0% (0.8)  | unknown | 2  | 6  |
| 1447 | TRUE | Empty | Protein Wdr75 OS-Mus musculus GN-Wdr75 PE-1 SV-1                                                                                 | tr Q18218 194 kDa   | TRUE      | 0% (1.3)  | unknown | 3  | 3  |
| 1448 | TRUE | Empty | Protein Gltpr11 OS-Mus musculus GN-Gltpr11 PE-2 SV-1                                                                             | tr Q05DAG27 6 kDa   | TRUE      | 0% (0.7)  | unknown | 4  | 6  |
| 1449 | TRUE | Empty | Thioredoxin-related transmembrane protein 4 OS-Mus musculus GN-Trtm4 PE-1 SV-2                                                   | sp Q08CLO37 6 kDa   | TRUE      | 0% (1.0)  | unknown | 5  | 5  |
| 1450 | TRUE | Empty | Uncharacterized protein C10orf107 homolog OS-Mus musculus PE-2 SV-2                                                              | sp Q08C7274 6 kDa   |           |           |         |    |    |

|      |      |       |                                                                                                                   |                    |           |           |         |   |    |
|------|------|-------|-------------------------------------------------------------------------------------------------------------------|--------------------|-----------|-----------|---------|---|----|
| 1491 | TRUE | Empty | Proteasome activator complex subunit 3 OS=Mus musculus GN=Psm3 PE=1 SV=1                                          | sp P61290 30 Kda   | 95% (INF) | unknown   | 5       | 0 |    |
| 1492 | TRUE | Empty | Testis-specific serine/threonine protein kinase 4 OS=Mus musculus GN=Tsak4 PE=2 SV=1                              | sp O204137 Kda     | 95% (0.0) | unknown   | 0       | 6 |    |
| 1493 | TRUE | Empty | Protein arginine N-methyltransferase 1 OS=Mus musculus GN=Prmt1 PE=1 SV=1                                         | sp O20801 42 Kda   | TRUE      | 95% (0.0) | unknown | 7 | 0  |
| 1494 | TRUE | Empty | Septin-9 (Fragment) OS=Mus musculus GN=Sept9 PE=1 SV=1                                                            | tr J2A6U5 28 Kda   | TRUE      | 95% (0.0) | unknown | 0 | 8  |
| 1495 | TRUE | Empty | Leucine-rich repeat and calponin homology domain-containing protein 3 OS=Mus musculus GN=Lrch3 PE=2 SV=1          | tr B7ZWM 76 Kda    | TRUE      | 95% (0.0) | unknown | 0 | 8  |
| 1496 | TRUE | Empty | N-acetyl-L-lysine membrane protease subunit 1 OS=Mus musculus GN=Nlmpj2 PE=2 SV=1                                 | sp O208720 Kda     | TRUE      | 0% (0.0)  | unknown | 4 | 5  |
| 1497 | TRUE | Empty | Disintegrin and metalloprotease domain-containing protein 14 OS=Mus musculus GN=Adm14 PE=2 SV=3                   | sp O2088187 Kda    | TRUE      | 95% (0.4) | unknown | 2 | 5  |
| 1498 | TRUE | Empty | G-rich sequence factor 1 OS=Mus musculus GN=Grsf1 PE=1 SV=2                                                       | sp O208503 Kda     | TRUE      | 0% (1.7)  | unknown | 5 | 3  |
| 1499 | TRUE | Empty | Ribosome biogenesis protein BRX1 homolog OS=Mus musculus GN=Brx1 PE=2 SV=3                                        | sp O208C41 Kda     | TRUE      | 95% (0.4) | unknown | 2 | 5  |
| 1500 | TRUE | Empty | N-acetyl-D-glucosaminylase OS=Mus musculus GN=Naga PE=2 SV=3                                                      | sp O208D37 Kda     | TRUE      | 95% (2.0) | unknown | 3 | 2  |
| 1501 | TRUE | Empty | Target of Ahp protein 1 OS=Mus musculus GN=Thp1 PE=1 SV=1                                                         | sp O208J237 Kda    | TRUE      | 0% (0.8)  | unknown | 3 | 4  |
| 1502 | TRUE | Empty | Ras-related protein Rab-5C OS=Mus musculus GN=Rab5c PE=1 SV=2                                                     | sp P35278 23 Kda   | TRUE      | 0% (1.7)  | unknown | 5 | 3  |
| 1503 | TRUE | Empty | CUGBP Elav-like family member 1 OS=Mus musculus GN=Celf1 PE=1 SV=2                                                | sp P28659 52 Kda   | TRUE      | 0% (1.5)  | unknown | 3 | 2  |
| 1504 | TRUE | Empty | Nuclei protein OS=Mus musculus GN=Nhp1 PE=2 SV=1                                                                  | tr B7ZWM 52 Kda    | TRUE      | 0% (1.5)  | unknown | 3 | 2  |
| 1505 | TRUE | Empty | Nuclear export mediator factor Nef1 OS=Mus musculus GN=Nef1 PE=1 SV=2                                             | sp O208CCP 121 Kda | TRUE      | 95% (2.5) | unknown | 5 | 2  |
| 1506 | TRUE | Empty | MCG53108 OS=Mus musculus GN=Rbm31 PE=2 SV=1                                                                       | tr O208U463 Kda    | TRUE      | 0% (1.3)  | unknown | 4 | 2  |
| 1507 | TRUE | Empty | Leucine-rich repeat-containing protein 71 OS=Mus musculus GN=Lrrc71 PE=2 SV=1                                     | sp O208R9W61 Kda   | TRUE      | 0% (0.6)  | unknown | 3 | 5  |
| 1508 | TRUE | Empty | NADH-cytochrome b5 reductase 3 OS=Mus musculus GN=Cyfb3 PE=1 SV=3                                                 | sp O208Q28 Kda     | TRUE      | 0% (0.7)  | unknown | 2 | 3  |
| 1509 | TRUE | Empty | Sperm axosome membrane-associated protein 1 OS=Mus musculus GN=Spaxa1 PE=2 SV=1                                   | sp O208A413 Kda    | TRUE      | 0% (1.3)  | unknown | 4 | 3  |
| 1510 | TRUE | Empty | Ribosome production factor 2 homolog OS=Mus musculus GN=Rpf2 PE=2 SV=2                                            | sp O208J035 Kda    | TRUE      | 0% (1.5)  | unknown | 3 | 2  |
| 1511 | TRUE | Empty | Histone deacetylase 2 OS=Mus musculus GN=Hdac2 PE=1 SV=1                                                          | sp P20288 55 Kda   | TRUE      | 0% (1.1)  | unknown | 3 | 4  |
| 1512 | TRUE | Empty | Proteasome subunit beta type-6 OS=Mus musculus GN=Psm6 PE=1 SV=3                                                  | sp O20860225 Kda   | TRUE      | 0% (0.8)  | unknown | 3 | 4  |
| 1513 | TRUE | Empty | 14-3-3 protein beta/alpha OS=Mus musculus GN=Ywhab PE=1 SV=3                                                      | sp O208CV28 Kda    | TRUE      | 0% (1.1)  | unknown | 6 | 3  |
| 1514 | TRUE | Empty | Protein 4930544G11R8 OS=Mus musculus GN=4930544G11R8 PE=2 SV=1                                                    | tr O208CR9 22 Kda  | TRUE      | 0% (0.7)  | unknown | 2 | 3  |
| 1515 | TRUE | Empty | Dual specificity protein phosphatase CDC14B OS=Mus musculus GN=Cdc14b PE=2 SV=1                                   | sp O208PPY 56 Kda  | TRUE      | 0% (1.5)  | unknown | 3 | 2  |
| 1516 | TRUE | Empty | Deonin OS=Mus musculus GN=De1 PE=1 SV=1                                                                           | sp P11001 53 Kda   | TRUE      | 0% (0.9)  | unknown | 3 | 3  |
| 1517 | TRUE | Empty | Cystatin-12 OS=Mus musculus GN=Ct12 PE=1 SV=1                                                                     | sp O208AN 15 Kda   | TRUE      | 0% (1.3)  | unknown | 4 | 3  |
| 1518 | TRUE | Empty | Isoschimatase domain-containing protein 2A, mitochondrial OS=Mus musculus GN=Iso2ca PE=2 SV=1                     | sp P05904 22 Kda   | TRUE      | 0% (1.0)  | unknown | 4 | 4  |
| 1519 | TRUE | Empty | ATP synthase subunit f, mitochondrial OS=Mus musculus GN=Atp5f2 PE=1 SV=3                                         | sp P5615 10 Kda    | TRUE      | 0% (1.0)  | unknown | 4 | 4  |
| 1520 | TRUE | Empty | Signal anchor homolog 1 OS=Mus musculus GN=Angel1 PE=2 SV=2                                                       | sp O208CV175 Kda   | TRUE      | 0% (1.0)  | unknown | 4 | 4  |
| 1521 | TRUE | Empty | Signal peptidase complex subunit 3 OS=Mus musculus GN=Spca3 PE=2 SV=1                                             | tr Q2WZ0 22 Kda    | TRUE      | 95% (3.0) | unknown | 2 | 6  |
| 1522 | TRUE | Empty | 5'-nucleotidase OS=Mus musculus GN=Nt5e PE=1 SV=2                                                                 | sp O208I364 Kda    | TRUE      | 0% (0.8)  | unknown | 3 | 4  |
| 1523 | TRUE | Empty | Protein 49292 OS=Mus musculus GN=49292 PE=2 SV=1                                                                  | tr P7887 53 Kda    | TRUE      | 95% (0.5) | unknown | 3 | 3  |
| 1524 | TRUE | Empty | Leucine-rich repeat and death domain-containing protein 1 OS=Mus musculus GN=Lrrd1 PE=2 SV=2                      | sp O208C8997 Kda   | TRUE      | 0% (1.0)  | unknown | 2 | 2  |
| 1525 | TRUE | Empty | Survival of motor neuron-related-splicing factor 30 OS=Mus musculus GN=Smndc1 PE=2 SV=1                           | sp O208B727 Kda    | TRUE      | 0% (1.0)  | unknown | 4 | 4  |
| 1526 | TRUE | Empty | Uncharacterized protein C2orf62 homolog OS=Mus musculus GN=C2orf62 PE=2 SV=1                                      | sp J8KEK5 59 Kda   | TRUE      | 0% (1.5)  | unknown | 3 | 2  |
| 1527 | TRUE | Empty | OS ribosomal protein L7-like 1 OS=Mus musculus GN=Rpl7l1 PE=2 SV=1                                                | sp O208B20 Kda     | TRUE      | 0% (1.0)  | unknown | 2 | 5  |
| 1528 | TRUE | Empty | ATP-dependent RNA helicase DDX24 OS=Mus musculus GN=DDX24 PE=1 SV=2                                               | sp O208SV96 Kda    | TRUE      | 0% (1.0)  | unknown | 2 | 2  |
| 1529 | TRUE | Empty | Coiled-coil domain-containing protein 42A OS=Mus musculus GN=Ccdc42 PE=2 SV=2                                     | sp O208SV638 Kda   | TRUE      | 95% (0.4) | unknown | 2 | 5  |
| 1530 | TRUE | Empty | General transcription factor I-I OS=Mus musculus GN=Gtf2i PE=2 SV=1                                               | tr Q1UHU 108 Kda   | TRUE      | 0% (0.7)  | unknown | 2 | 3  |
| 1531 | TRUE | Empty | Peptidyl-prolyl cis-trans isomerase-like 1 OS=Mus musculus GN=Psi1 PE=2 SV=1                                      | sp O208R18 Kda     | TRUE      | 0% (0.8)  | unknown | 2 | 3  |
| 1532 | TRUE | Empty | Splicing factor 1 OS=Mus musculus GN=Sf1 PE=1 SV=6                                                                | sp O208421370 Kda  | TRUE      | 95% (0.3) | unknown | 2 | 6  |
| 1533 | TRUE | Empty | Protein Arid2 OS=Mus musculus GN=Arid2 PE=2 SV=1                                                                  | tr E9Q7E2 196 Kda  | TRUE      | 95% (0.2) | unknown | 1 | 4  |
| 1534 | TRUE | Empty | Coiled-coil domain-containing protein 176 OS=Mus musculus GN=Ccdc176 PE=2 SV=2                                    | sp O208V7963 Kda   | TRUE      | 95% (0.4) | unknown | 2 | 5  |
| 1535 | TRUE | Empty | OS methylglutamine-induced apoptosis 2 OS=Mus musculus GN=Omg2 PE=2 SV=1                                          | sp O208Q338 Kda    | TRUE      | 95% (0.0) | unknown | 2 | 5  |
| 1536 | TRUE | Empty | Gameteocyte-specific factor 3-like OS=Mus musculus GN=Gsf3l1 PE=2 SV=1                                            | sp O208CV17 Kda    | TRUE      | 0% (0.8)  | unknown | 3 | 4  |
| 1537 | TRUE | Empty | Actin-related protein 2 OS=Mus musculus GN=Actr2 PE=1 SV=1                                                        | sp P16161 45 Kda   | TRUE      | 0% (1.3)  | unknown | 4 | 3  |
| 1538 | TRUE | Empty | Signal peptidase complex subunit 2 OS=Mus musculus GN=Spca2 PE=2 SV=1                                             | sp O208CV225 Kda   | TRUE      | 95% (0.5) | unknown | 2 | 4  |
| 1539 | TRUE | Empty | Uridylate chain-acyl-CoA reductase OS=Mus musculus GN=Ucr1 PE=1 SV=1                                              | sp O208CV736 Kda   | TRUE      | 95% (2.0) | unknown | 5 | 5  |
| 1540 | TRUE | Empty | Desmoplakin OS=Mus musculus GN=Dsp PE=2 SV=1                                                                      | sp E9Q57 333 Kda   | TRUE      | 95% (2.0) | unknown | 4 | 2  |
| 1541 | TRUE | Empty | Long-chain fatty acid-CoA ligase ACSBG1 OS=Mus musculus GN=Acsg1 PE=1 SV=1                                        | sp O208PPU80 Kda   | TRUE      | 95% (2.5) | unknown | 5 | 2  |
| 1542 | TRUE | Empty | Very long-chain specific acyl-CoA dehydrogenase, mitochondrial OS=Mus musculus GN=Acadvl PE=1 SV=3                | sp P05045 10 Kda   | TRUE      | 95% (4.0) | unknown | 4 | 1  |
| 1543 | TRUE | Empty | RNA 7-methylguanosine triphosphate cyclase OS=Mus musculus GN=Rtc PE=2 SV=2                                       | sp O208R370 Kda    | TRUE      | 0% (1.1)  | unknown | 4 | 4  |
| 1544 | TRUE | Empty | MCG11564 OS=Mus musculus GN=170001980R PE=2 SV=1                                                                  | tr G1A23 56 Kda    | TRUE      | 95% (0.2) | unknown | 1 | 4  |
| 1545 | TRUE | Empty | Serine/threonine protein phosphatase 4 regulatory subunit 1 OS=Mus musculus GN=Ppp4r1 PE=2 SV=2                   | sp O208K7106 Kda   | TRUE      | 95% (0.4) | unknown | 2 | 5  |
| 1546 | TRUE | Empty | Phosphatase DHDH1 OS=Mus musculus GN=Dhdh1 PE=2 SV=1                                                              | tr E9Q3C8 98 Kda   | TRUE      | 95% (3.0) | unknown | 1 | 1  |
| 1547 | TRUE | Empty | RNP15-like protein OS=Mus musculus GN=Rnp15 PE=2 SV=1                                                             | sp O208CV731 Kda   | TRUE      | 95% (0.7) | unknown | 2 | 4  |
| 1548 | TRUE | Empty | Nuclear distribution protein nude-like 1 OS=Mus musculus GN=Ndel1 PE=1 SV=2                                       | sp O208ER138 Kda   | TRUE      | 95% (0.2) | unknown | 1 | 5  |
| 1549 | TRUE | Empty | Eukaryotic translation initiation factor 3 subunit G OS=Mus musculus GN=Elf3g PE=1 SV=2                           | sp O208I2136 Kda   | TRUE      | 95% (5.0) | unknown | 5 | 1  |
| 1550 | TRUE | Empty | Uridylate chain-acyl-CoA reductase OS=Mus musculus GN=Ucr1 PE=1 SV=1                                              | sp P18242 45 Kda   | TRUE      | 0% (1.0)  | unknown | 3 | 3  |
| 1551 | TRUE | Empty | Glyoxylate reductase 54 domain-containing protein OS=Mus musculus GN=Gr54 PE=2 SV=2                               | sp O208AR243 Kda   | TRUE      | 95% (1.0) | unknown | 3 | 3  |
| 1552 | TRUE | Empty | Malactin OS=Mus musculus GN=Mlec PE=2 SV=2                                                                        | sp O208Q3 32 Kda   | TRUE      | 95% (2.0) | unknown | 2 | 1  |
| 1553 | TRUE | Empty | Myocardial zonula adherens protein OS=Mus musculus GN=Myzap PE=1 SV=1                                             | sp O208J39 54 Kda  | TRUE      | 95% (0.2) | unknown | 1 | 5  |
| 1554 | TRUE | Empty | Wnt2c OS=Mus musculus GN=Wnt2c PE=2 SV=1                                                                          | sp O208K0133 Kda   | TRUE      | 95% (0.3) | unknown | 3 | 3  |
| 1555 | TRUE | Empty | Asparagine-IRNA ligase, cytoplasmic OS=Mus musculus GN=Nars PE=1 SV=2                                             | sp O208B4764 Kda   | TRUE      | 0% (1.5)  | unknown | 3 | 2  |
| 1556 | TRUE | Empty | Isocitrate dehydrogenase [NAD] subunit alpha, mitochondrial OS=Mus musculus GN=Ihd3a PE=1 SV=1                    | sp O208G6R240 Kda  | TRUE      | 95% (4.0) | unknown | 4 | 1  |
| 1557 | TRUE | Empty | 26S proteasome non-ATPase regulatory subunit 8 OS=Mus musculus GN=Psm8 PE=2 SV=2                                  | sp O208CK5640 Kda  | TRUE      | 95% (2.0) | unknown | 2 | 1  |
| 1558 | TRUE | Empty | Adenylate kinase 1 OS=Mus musculus GN=Ak1 PE=1 SV=4                                                               | sp O208I45 45 Kda  | TRUE      | 95% (0.5) | unknown | 1 | 6  |
| 1559 | TRUE | Empty | Tight junction protein 20-2 OS=Mus musculus GN=Tjgp2 PE=1 SV=2                                                    | sp O208ZU1131 Kda  | TRUE      | 95% (0.2) | unknown | 1 | 6  |
| 1560 | TRUE | Empty | Glutathione S-transferase P 1 OS=Mus musculus GN=Gstp1 PE=1 SV=2                                                  | sp P19157 24 Kda   | TRUE      | 0% (1.0)  | unknown | 3 | 3  |
| 1561 | TRUE | Empty | Leucine-rich repeat-containing protein 51 OS=Mus musculus GN=Lrrc51 PE=2 SV=1                                     | sp O208A222 Kda    | TRUE      | 0% (1.0)  | unknown | 2 | 2  |
| 1562 | TRUE | Empty | Eukaryotic translation elongation factor 1 epsilon OS=Mus musculus GN=Elf1 PE=2 SV=1                              | sp O208R370 Kda    | TRUE      | 95% (1.0) | unknown | 2 | 5  |
| 1563 | TRUE | Empty | Coiled-coil domain-containing protein 30 OS=Mus musculus GN=Ccdc30 PE=2 SV=1                                      | tr AWHW 27 Kda     | TRUE      | 0% (1.0)  | unknown | 2 | 2  |
| 1564 | TRUE | Empty | RNA polymerase II-associated factor 1 homolog OS=Mus musculus GN=Rpa1f1 PE=2 SV=1                                 | sp O208K7861 Kda   | TRUE      | 95% (0.0) | unknown | 0 | 2  |
| 1565 | TRUE | Empty | 60S ribosomal protein L16a OS=Mus musculus GN=Rpl16a PE=2 SV=2                                                    | sp P08882 12 Kda   | TRUE      | 0% (0.8)  | unknown | 4 | 5  |
| 1566 | TRUE | Empty | Cytochrome b-c1 complex subunit 6, mitochondrial OS=Mus musculus GN=Cyb6 PE=1 SV=2                                | sp P09020 10 Kda   | TRUE      | 95% (0.7) | unknown | 4 | 6  |
| 1567 | TRUE | Empty | Protein BCG51142 (Fragment) OS=Mus musculus GN=BCG51142 PE=4 SV=1                                                 | tr J2AGC25 16 Kda  | TRUE      | 0% (0.9)  | unknown | 5 | 4  |
| 1568 | TRUE | Empty | Actin, cytoplasmic 1 (Fragment) OS=Mus musculus GN=Actb PE=2 SV=1                                                 | tr E9Q606 17 Kda   | TRUE      | 0% (0.7)  | unknown | 3 | 5  |
| 1569 | TRUE | Empty | 40S ribosomal protein S27 OS=Mus musculus GN=Rps27 PE=1 SV=3                                                      | sp O208W09 Kda     | TRUE      | 95% (INF) | unknown | 3 | 0  |
| 1570 | TRUE | Empty | Histidine triad nucleotide-binding protein 1 OS=Mus musculus GN=Htn1 PE=1 SV=3                                    | sp P07048 14 Kda   | TRUE      | 95% (INF) | unknown | 3 | 0  |
| 1571 | TRUE | Empty | Protein Zfp646 OS=Mus musculus GN=Zfp646 PE=2 SV=1                                                                | tr Q9N6V6 197 Kda  | TRUE      | 95% (0.0) | unknown | 0 | 3  |
| 1572 | TRUE | Empty | X-linked lymphocyte-regulated protein 3C OS=Mus musculus GN=Xlr3c PE=2 SV=1                                       | sp O208R826 Kda    | TRUE      | 95% (0.0) | unknown | 0 | 2  |
| 1573 | TRUE | Empty | Tubulin alpha-1A chain OS=Mus musculus GN=Tuba1a PE=1 SV=1                                                        | sp P08830 50 Kda   | TRUE      | 95% (INF) | unknown | 8 | 0  |
| 1574 | TRUE | Empty | Coiled-coil helix-coiled-coil helix domain-containing protein 6, mitochondrial OS=Mus musculus GN=Chch6 PE=2 SV=2 | sp O208V190 Kda    | TRUE      | 95% (0.0) | unknown | 0 | 10 |
| 1575 | TRUE | Empty | Chromatin target of PRMT1 protein OS=Mus musculus GN=Chtop PE=1 SV=2                                              | sp O208Y727 Kda    | TRUE      | 95% (INF) | unknown | 8 | 0  |
| 1576 | TRUE | Empty | NGF-A-binding protein 2 OS=Mus musculus GN=Nab2 PE=1 SV=1                                                         | sp O208I1257 Kda   | TRUE      | 95% (0.0) | unknown | 0 | 3  |
| 1577 | TRUE | Empty | Coiled-coil domain-containing protein 54 OS=Mus musculus GN=Ccdc54 PE=2 SV=1                                      | sp O208A138 Kda    | TRUE      | 0% (1.0)  | unknown | 2 | 3  |
| 1578 | TRUE | Empty | WD repeat-containing protein 46 OS=Mus musculus GN=Wdr46 PE=2 SV=1                                                | sp O208ZV6169 Kda  | TRUE      | 0% (0.7)  | unknown | 2 | 3  |
| 1579 | TRUE | Empty | Coiled-coil domain-containing protein 113 OS=Mus musculus GN=Ccdc113 PE=2 SV=1                                    | sp O208CT844 Kda   | TRUE      | 0% (1.0)  | unknown | 3 | 3  |
| 1580 | TRUE | Empty | Phosphatidylycerophosphatase and protein-tyrosine phosphatase 1 OS=Mus musculus GN=Ptpn11 PE=1 SV=1               | sp O208G7222 Kda   | TRUE      | 0% (1.3)  | unknown | 4 | 3  |
| 1581 | TRUE | Empty | Protein tyrosine phosphatase 3 subunit C OS=Mus musculus GN=Efr3c PE=1 SV=1                                       | sp O208R1416 Kda   | TRUE      | 0% (1.3)  | unknown | 4 | 3  |
| 1582 | TRUE | Empty | Protein Stryl1 OS=Mus musculus GN=Stryl1 PE=2 SV=1                                                                | tr O208AR238 Kda   | TRUE      | 95% (0.5) | unknown | 2 | 4  |
| 1583 | TRUE | Empty | Membrane-associated progesterone receptor component 1 OS=Mus musculus GN=Pgrmc1 PE=1 SV=4                         | sp O208S2222 Kda   | TRUE      | 0% (1.0)  | unknown | 4 | 4  |
| 1584 | TRUE | Empty | Uncharacterized protein C3orf62 homolog OS=Mus musculus GN=C3orf62 PE=2 SV=1                                      | sp O208Q9C 29 Kda  | TRUE      | 0% (1.3)  | unknown | 4 | 3  |
| 1585 | TRUE | Empty | Serine/threonine protein phosphatase 2A catalytic subunit alpha isoform OS=Mus musculus GN=Ppp2ca PE=1 SV=1       | sp P03331 36 Kda   | TRUE      | 95% (0.0) | unknown | 5 | 3  |
| 1586 | TRUE | Empty | Transketolase-like protein 2 OS=Mus musculus GN=Tkl2 PE=2 SV=1                                                    | sp O208A068 Kda    | TRUE      | 95% (0.8) | unknown | 3 | 4  |
| 1587 | TRUE | Empty | Regulation of nuclear pre-mRNA domain-containing protein 18 OS=Mus musculus GN=Rnpld1 PE=1 SV=2                   | sp O208CV37 Kda    | TRUE      | 0% (0.7)  | unknown | 2 | 3  |
| 1588 | TRUE | Empty | Cofilin-2 OS=Mus musculus GN=Cfl2 PE=1 SV=1                                                                       | sp P4559 19 Kda    | TRUE      | 0% (1.1)  | unknown | 4 | 3  |
| 1589 | TRUE | Empty | RNA-binding protein FUS OS=Mus musculus GN=Fus PE=2 SV=1                                                          | sp P05693 53 Kda   | TRUE      | 0% (1.7)  | unknown | 5 | 3  |
| 1590 | TRUE | Empty | MCG64776 OS=Mus musculus GN=493341603R PE=2 SV=1                                                                  | tr O208V63 43 Kda  | TRUE      | 0% (1.0)  | unknown | 3 | 3  |
| 1591 | TRUE | Empty | Peptidyl-prolyl cis-trans isomerase D OS=Mus musculus GN=PsiD PE=1 SV=3                                           | sp O208CR141 Kda   | TRUE      | 0% (1.3)  | unknown | 4 | 3  |
| 1592 | TRUE | Empty | U3 small nuclear RNA-associated protein 18 homolog OS=Mus musculus GN=Utp18 PE=1 SV=1                             | sp O208S6 61 Kda   | TRUE      | 95% (0.5) | unknown | 2 | 4  |
| 1593 | TRUE | Empty | Cytosine TRNA OS=Mus musculus GN=Ctra PE=1 SV=1                                                                   | sp O208T50444 Kda  | TRUE      | 95% (0.0) | unknown | 4 | 6  |
| 1594 | TRUE | Empty | Protein phosphatase 1A OS=Mus musculus GN=Ppp1a PE=1 SV=1                                                         | sp P49443 42 Kda   | TRUE      | 95% (0.2) | unknown | 1 | 4  |
| 1595 | TRUE | Empty | 5'13'-deoxyribonucleotidase, cytosolic type OS=Mus musculus GN=Nt5c PE=1 SV=1                                     | sp O208N123 Kda    | TRUE      | 95% (3.0) | unknown | 1 | 3  |
| 1596 | TRUE | Empty | Argininosuccinate lyase OS=Mus musculus GN=Argl PE=1 SV=2                                                         | sp O208M108 Kda    | TRUE      | 0% (1.0)  | unknown | 2 | 6  |
| 1597 | TRUE | Empty | Heterogeneous nuclear ribonucleoprotein H2 OS=Mus musculus GN=Hnrp21 PE=1 SV=1                                    | sp P03333 49 Kda   | TRUE      | 95% (1.1) | unknown | 3 | 3  |
| 1598 | TRUE | Empty | Methionine-IRNA ligase, cytoplasmic OS=Mus musculus GN=Mars PE=2 SV=1                                             | sp O208R16101 Kda  | TRUE      | 95% (3.0) | unknown | 3 | 1  |
| 1599 | TRUE | Empty | Sjogrens syndrome/scleroderma autoantigen 1 homolog OS=Mus musculus GN=Ssca1 PE=2 SV=1                            | sp P56879 21 Kda   | TRUE      | 95% (4.0) | unknown | 4 | 1  |
| 1600 | TRUE | Empty | Retinol dehydrogenase 1 OS=Mus musculus GN=Rdh1 PE=2 SV=1                                                         | sp O208T228 Kda    | TRUE      | 95% (0.2) | unknown | 4 | 4  |
| 1601 | TRUE | Empty | Programmed cell death 6-interacting protein OS=Mus musculus GN=Pcdip6 PE=1 SV=3                                   | sp O208W976 Kda    | TRUE      | 95% (2.0) | unknown | 2 | 1  |
| 1602 | TRUE | Empty | Polymerase delta-interacting protein 3 OS=Mus musculus GN=Poldip3 PE=2 SV=1                                       | sp O208B8146 Kda   |           |           |         |   |    |

|      |      |       |                                                                                                                                         |              |          |      |           |         |   |   |
|------|------|-------|-----------------------------------------------------------------------------------------------------------------------------------------|--------------|----------|------|-----------|---------|---|---|
| 1644 | TRUE | Empty | Transcriptional repressor p66 alpha OS-Mus musculus GN-Gata2a PE-1 SV-2                                                                 | sp Q8BHCY667 | Kda      |      | 95% (0.0) | unknown | 0 | 3 |
| 1645 | TRUE | Empty | Nuclear receptor coactivator 2 OS-Mus musculus GN-Grnp1 PE-2 SV-1                                                                       | tr Q2D06     | 70 Kda   | TRUE | 95% (0.0) | unknown | 0 | 8 |
| 1646 | TRUE | Empty | Dyngin factor 1-delta OS-Mus musculus GN-Grp4 PE-2 SV-1                                                                                 | tr Q8BTT0    | 31 Kda   | TRUE | 95% (0.0) | unknown | 0 | 7 |
| 1647 | TRUE | Empty | Protein Vaa3b OS-Mus musculus GN-Vaa3b PE-2 SV-1                                                                                        | tr Q90S0     | 18 Kda   | TRUE | 95% (INF) | unknown | 7 | 0 |
| 1648 | TRUE | Empty | Protein Gm20441 (Fragment) OS-Mus musculus GN-Gm20441 PE-4 SV-1                                                                         | tr GU1V7     | 29 Kda   | TRUE | 95% (INF) | unknown | 5 | 0 |
| 1649 | TRUE | Empty | Keratin, type I cytokeletal 15 OS-Mus musculus GN-Krt15 PE-1 SV-3                                                                       | sp Q52NA1    | 52 Kda   | TRUE | 95% (INF) | unknown | 6 | 0 |
| 1650 | TRUE | Empty | Tudor and KH domain-containing protein OS-Mus musculus GN-Grp4 PE-2 SV-1                                                                | sp Q8BTV4    | 62 Kda   | TRUE | 95% (INF) | unknown | 6 | 3 |
| 1651 | TRUE | Empty | Ubiquitin-like modifier-activating enzyme 6 OS-Mus musculus GN-Uba6 PE-1 SV-1                                                           | sp Q8C7R1    | 118 Kda  | TRUE | 0% (1.3)  | unknown | 3 | 3 |
| 1652 | TRUE | Empty | Serp1n b6 OS-Mus musculus GN-Serp1nb6 PE-2 SV-1                                                                                         | sp Q8C8A4    | 43 Kda   | TRUE | 0% (1.5)  | unknown | 3 | 2 |
| 1653 | TRUE | Empty | Calculation factor C subunit 1 OS-Mus musculus GN-Hf4 PE-1 SV-1                                                                         | sp Q599C     | 40 Kda   | TRUE | 0% (1.5)  | unknown | 7 | 0 |
| 1654 | TRUE | Empty | Dynein assembly factor 1, axonemal OS-Mus musculus GN-Dnaa1 PE-2 SV-1                                                                   | sp Q90S0     | 70 Kda   | TRUE | 95% (2.0) | unknown | 4 | 2 |
| 1655 | TRUE | Empty | M-phase phosphoprotein 8 OS-Mus musculus GN-Mphosph8 PE-1 SV-1                                                                          | sp Q3ATV9    | 67 Kda   | TRUE | 0% (0.7)  | unknown | 2 | 3 |
| 1656 | TRUE | Empty | NEDD8-conjugating enzyme Ubc12 OS-Mus musculus GN-Ubc12 PE-2 SV-1                                                                       | sp P61082    | 21 Kda   | TRUE | 0% (1.5)  | unknown | 3 | 2 |
| 1657 | TRUE | Empty | 1,2,3,6-mannosyltransferase ALG2 OS-Mus musculus GN-Grp2 PE-2 SV-2                                                                      | sp Q90SE4    | 7 Kda    | TRUE | 0% (1.0)  | unknown | 3 | 3 |
| 1658 | TRUE | Empty | Thimet oligopeptidase OS-Mus musculus GN-Tho1 PE-1 SV-1                                                                                 | sp Q8C1A5    | 71 Kda   | TRUE | 0% (1.5)  | unknown | 3 | 2 |
| 1659 | TRUE | Empty | GTP-binding nuclear protein Ran OS-Mus musculus GN-Ran PE-1 SV-3                                                                        | sp P62827    | 24 Kda   | TRUE | 0% (1.0)  | unknown | 4 | 4 |
| 1660 | TRUE | Empty | WAP four-disulfide core domain protein 15A OS-Mus musculus GN-Wf4a15a PE-3 SV-1                                                         | sp Q8B8E9    | 4 Kda    | TRUE | 0% (1.3)  | unknown | 4 | 3 |
| 1661 | TRUE | Empty | Stromal cell-derived factor 2-like protein 1 OS-Mus musculus GN-Hsd2l1 PE-2 SV-2                                                        | sp Q90S7     | 24 Kda   | TRUE | 0% (1.3)  | unknown | 4 | 3 |
| 1662 | TRUE | Empty | Coiled-coil domain-containing protein C16orf93 homolog OS-Mus musculus GN-Gm166 PE-2 SV-2                                               | sp Q90ZQ3    | 38 Kda   | TRUE | 95% (0.4) | unknown | 2 | 5 |
| 1663 | TRUE | Empty | Peroxiredoxin-2 OS-Mus musculus GN-Prx2 PE-1 SV-3                                                                                       | sp Q61171    | 22 Kda   | TRUE | 0% (1.3)  | unknown | 4 | 3 |
| 1664 | TRUE | Empty | Protein 1700341138k OS-Mus musculus GN-1700341138k PE-4 SV-1                                                                            | tr Q50276    | 12 Kda   | TRUE | 0% (1.0)  | unknown | 3 | 3 |
| 1665 | TRUE | Empty | Protein 9220101308k OS-Mus musculus GN-9220101308k PE-2 SV-1                                                                            | tr Q92320    | 31 Kda   | TRUE | 95% (2.0) | unknown | 4 | 2 |
| 1666 | TRUE | Empty | U3 small nucleolar RNA-interacting protein 2 OS-Mus musculus GN-Rp9 PE-1 SV-1                                                           | sp Q91WV5    | 2 Kda    | TRUE | 0% (1.0)  | unknown | 2 | 2 |
| 1667 | TRUE | Empty | 3 beta-hydroxysteroid dehydrogenase/Delta 5-4-isoenzyme type 1 OS-Mus musculus GN-Hsd3b1 PE-2 SV-3                                      | sp P24815    | 42 Kda   | TRUE | 95% (0.2) | unknown | 1 | 4 |
| 1668 | TRUE | Empty | NAT1C-interacting protein OS-Mus musculus GN-Nf120 PE-1 SV-1                                                                            | sp Q9J104    | 40 Kda   | TRUE | 0% (1.5)  | unknown | 3 | 2 |
| 1669 | TRUE | Empty | Protein Paf6y1 OS-Mus musculus GN-Paf6y1 PE-2 SV-1                                                                                      | tr Q904E5    | 7 Kda    | TRUE | 0% (1.1)  | unknown | 3 | 1 |
| 1670 | TRUE | Empty | Protein FAM221B OS-Mus musculus GN-Fam221b PE-2 SV-1                                                                                    | sp Q8C627    | 54 Kda   | TRUE | 95% (0.3) | unknown | 1 | 3 |
| 1671 | TRUE | Empty | Nucleoside diphosphate kinase 8 OS-Mus musculus GN-Nme2 PE-1 SV-1                                                                       | sp Q91788    | 17 Kda   | TRUE | 0% (1.0)  | unknown | 2 | 2 |
| 1672 | TRUE | Empty | Proteasome subunit alpha type-2 OS-Mus musculus GN-Poma2 PE-1 SV-3                                                                      | sp Q70452    | 58 Kda   | TRUE | 95% (0.3) | unknown | 1 | 3 |
| 1673 | TRUE | Empty | Ribonucleoprotein L-associated protein 15 OS-Mus musculus GN-Hlps15 PE-2 SV-1                                                           | sp Q8C7R5    | 50 Kda   | TRUE | 95% (0.3) | unknown | 2 | 2 |
| 1674 | TRUE | Empty | 14 kDa phosphohistidine phosphatase OS-Mus musculus GN-PHpt1 PE-1 SV-1                                                                  | sp Q90A04    | 14 Kda   | TRUE | 0% (1.5)  | unknown | 3 | 2 |
| 1675 | TRUE | Empty | 26S proteasome non-ATPase regulatory subunit 7 OS-Mus musculus GN-Psm7 PE-1 SV-2                                                        | sp P26516    | 37 Kda   | TRUE | 95% (0.5) | unknown | 1 | 2 |
| 1676 | TRUE | Empty | Ums19b-like ribonucleoprotein subunit alpha, mitochondrial OS-Mus musculus GN-Ums19b PE-1 SV-2                                          | sp Q90C55    | 35 Kda   | TRUE | 95% (1.0) | unknown | 1 | 2 |
| 1677 | TRUE | Empty | Nuclear protein localization protein 4 homolog OS-Mus musculus GN-Nlpla4 PE-1 SV-3                                                      | sp P60670    | 68 Kda   | TRUE | 95% (5.0) | unknown | 5 | 1 |
| 1678 | TRUE | Empty | RNA-binding protein Musashi homolog 2 OS-Mus musculus GN-Mu2 PE-1 SV-1                                                                  | sp Q902Q3    | 37 Kda   | TRUE | 95% (0.0) | unknown | 0 | 4 |
| 1679 | TRUE | Empty | Programmed cell death protein 4 OS-Mus musculus GN-Pcd4 PE-1 SV-1                                                                       | sp Q61823    | 32 Kda   | TRUE | 0% (1.0)  | unknown | 1 | 1 |
| 1680 | TRUE | Empty | Growth regulatory protein FAM212A OS-Mus musculus GN-Fam212a PE-1 SV-2                                                                  | sp Q90YF2    | 42 Kda   | TRUE | 95% (3.0) | unknown | 1 | 3 |
| 1681 | TRUE | Empty | Glyoxalase-like domain-containing protein 1 OS-Mus musculus GN-Gd1 PE-2 SV-2                                                            | tr G61421    | 44 Kda   | TRUE | 0% (1.0)  | unknown | 1 | 1 |
| 1682 | TRUE | Empty | Meiosis-expressed gene 1 protein OS-Mus musculus GN-Meig1 PE-1 SV-1                                                                     | sp Q61845    | 11 Kda   | TRUE | 0% (1.0)  | unknown | 2 | 2 |
| 1683 | TRUE | Empty | MCG977, isoform CRA_b OS-Mus musculus GN-11100710150k PE-4 SV-1                                                                         | tr A2AN92    | 21 Kda   | TRUE | 0% (0.6)  | unknown | 2 | 3 |
| 1684 | TRUE | Empty | Rat-related C3 botulinum toxin substrate 3 OS-Mus musculus GN-Wb3c PE-1 SV-1                                                            | tr F80794    | 21 Kda   | TRUE | 95% (2.0) | unknown | 2 | 3 |
| 1685 | TRUE | Empty | Leucine-rich repeat-containing protein 47 OS-Mus musculus GN-Lrrc47 PE-2 SV-1                                                           | tr EP922     | 66 Kda   | TRUE | 95% (2.0) | unknown | 2 | 1 |
| 1686 | TRUE | Empty | Sumarate hydratase, mitochondrial OS-Mus musculus GN-Fh1 PE-1 SV-3                                                                      | sp P97807    | 54 Kda   | TRUE | 0% (0.7)  | unknown | 2 | 3 |
| 1687 | TRUE | Empty | NAOH dehydrogenase (aliquanine) iron-sulfur protein 8, mitochondrial OS-Mus musculus GN-Nduf8 PE-1 SV-1                                 | sp Q8K31     | 24 Kda   | TRUE | 95% (2.0) | unknown | 2 | 1 |
| 1688 | TRUE | Empty | Protein 12429 OS-Mus musculus GN-Gm12429 PE-4 SV-1                                                                                      | tr Q3V229    | 147 Kda  | TRUE | 95% (0.2) | unknown | 2 | 2 |
| 1689 | TRUE | Empty | 14-3-3 protein eta OS-Mus musculus GN-Ywhah PE-1 SV-2                                                                                   | sp P68518    | 28 Kda   | TRUE | 95% (0.0) | unknown | 0 | 3 |
| 1690 | TRUE | Empty | Serine/threonine protein phosphatase 2B catalytic subunit gamma isoform OS-Mus musculus GN-Ppp3c PE-2 SV-1                              | sp P48455    | 59 Kda   | TRUE | 95% (0.4) | unknown | 2 | 5 |
| 1691 | TRUE | Empty | Eukaryotic translation initiation factor 5A-2 OS-Mus musculus GN-Eifs5a2 PE-2 SV-3                                                      | sp Q8B67     | 17 Kda   | TRUE | 95% (2.5) | unknown | 5 | 2 |
| 1692 | TRUE | Empty | Iron-sulfur OS-Mus musculus GN-Vtr1 PE-1 SV-2                                                                                           | tr P27818    | 55 Kda   | TRUE | 95% (0.2) | unknown | 3 | 3 |
| 1693 | TRUE | Empty | Glucosylase 2 subunit beta OS-Mus musculus GN-Prkch PE-1 SV-1                                                                           | sp Q90785    | 59 Kda   | TRUE | 0% (1.5)  | unknown | 3 | 2 |
| 1694 | TRUE | Empty | KRR1 small subunit processome component homolog OS-Mus musculus GN-Krr1 PE-2 SV-2                                                       | tr GUZAO     | 37 Kda   | TRUE | 95% (5.5) | unknown | 5 | 2 |
| 1695 | TRUE | Empty | Extrad 17-beta-dehydrogenase 12 OS-Mus musculus GN-Hsd17b12 PE-2 SV-1                                                                   | sp Q70503    | 35 Kda   | TRUE | 0% (0.7)  | unknown | 2 | 3 |
| 1696 | TRUE | Empty | 14-3-3 protein gamma OS-Mus musculus GN-Ywhag PE-1 SV-2                                                                                 | tr P61968    | 28 Kda   | TRUE | 0% (0.9)  | unknown | 2 | 5 |
| 1697 | TRUE | Empty | N-alpha-acetyltransferase 40 OS-Mus musculus GN-Naa40 PE-2 SV-1                                                                         | sp Q8VE      | 1027 Kda | TRUE | 0% (0.7)  | unknown | 2 | 3 |
| 1698 | TRUE | Empty | Thioredoxin domain-containing protein 8 OS-Mus musculus GN-Trx8 PE-1 SV-1                                                               | sp Q69A25    | 21 Kda   | TRUE | 0% (1.0)  | unknown | 2 | 2 |
| 1699 | TRUE | Empty | Cellular nuclear acid-binding protein OS-Mus musculus GN-Cnabp PE-2 SV-2                                                                | sp P39596    | 20 Kda   | TRUE | 0% (0.7)  | unknown | 2 | 2 |
| 1700 | TRUE | Empty | Far upstream element-binding protein 2 OS-Mus musculus GN-Fus2 PE-1 SV-2                                                                | sp Q3JUV9    | 77 Kda   | TRUE | 95% (0.0) | unknown | 0 | 4 |
| 1701 | TRUE | Empty | 60S ribosomal protein L29 OS-Mus musculus GN-Rpl29 PE-2 SV-2                                                                            | sp P47915    | 18 Kda   | TRUE | 0% (1.7)  | unknown | 5 | 3 |
| 1702 | TRUE | Empty | Dolichyl-diphosphoglucosyltransferase subunit STT8 OS-Mus musculus GN-Stt8 PE-1 SV-2                                                    | sp Q7DTC     | 93 Kda   | TRUE | 0% (1.5)  | unknown | 3 | 2 |
| 1703 | TRUE | Empty | Protein Nuf96 (Fragment) OS-Mus musculus GN-Nuf96 PE-2 SV-1                                                                             | tr F32Q43    | 39 Kda   | TRUE | 0% (0.8)  | unknown | 0 | 3 |
| 1704 | TRUE | Empty | Gametocyte-specific factor 1 OS-Mus musculus GN-Gsf1 PE-2 SV-1                                                                          | sp Q90A09    | 19 Kda   | TRUE | 95% (0.0) | unknown | 0 | 2 |
| 1705 | TRUE | Empty | Probable RNA-binding protein 46 OS-Mus musculus GN-Rbm46 PE-4 SV-1                                                                      | sp P60489    | 60 Kda   | TRUE | 95% (0.0) | unknown | 0 | 3 |
| 1706 | TRUE | Empty | High mobility group protein B3 OS-Mus musculus GN-Hmgb3 PE-2 SV-3                                                                       | sp Q54879    | 23 Kda   | TRUE | 95% (0.0) | unknown | 0 | 3 |
| 1707 | TRUE | Empty | Protein NECD1 OS-Mus musculus GN-Need1 PE-2 SV-2                                                                                        | tr P33215    | 7 Kda    | TRUE | 95% (1.7) | unknown | 4 | 4 |
| 1708 | TRUE | Empty | Protein DnaH7a OS-Mus musculus GN-DnaH7a PE-2 SV-2                                                                                      | tr EQ078     | 461 Kda  | TRUE | 95% (0.0) | unknown | 0 | 1 |
| 1709 | TRUE | Empty | Cytochrome b-c1 complex subunit 1 OS-Mus musculus GN-Uqcrc1 PE-1 SV-3                                                                   | sp Q90851    | 4 Kda    | TRUE | 95% (INF) | unknown | 4 | 0 |
| 1710 | TRUE | Empty | Serine-rich coiled-coil domain-containing protein 2 OS-Mus musculus GN-Cscer2 PE-1 SV-1                                                 | sp Q3JUH9    | 93 Kda   | TRUE | 95% (0.0) | unknown | 0 | 2 |
| 1711 | TRUE | Empty | Transmembrane export protein 1 OS-Mus musculus GN-Tep1 PE-1 SV-2                                                                        | sp Q90Z05    | 116 Kda  | TRUE | 95% (0.0) | unknown | 0 | 6 |
| 1712 | TRUE | Empty | Transmembrane protein 209 OS-Mus musculus GN-Tmem209 PE-2 SV-1                                                                          | sp Q8B8G6    | 163 Kda  | TRUE | 95% (0.0) | unknown | 0 | 6 |
| 1713 | TRUE | Empty | Double-stranded RNA-binding protein Staufen homolog 1 OS-Mus musculus GN-Stauf1 PE-2 SV-1                                               | sp Q92108    | 54 Kda   | TRUE | 95% (INF) | unknown | 1 | 0 |
| 1714 | TRUE | Empty | Tetratropptide repeat protein 29 OS-Mus musculus GN-Ttcr29 PE-2 SV-1                                                                    | sp Q80W8     | 54 Kda   | TRUE | 95% (0.0) | unknown | 0 | 1 |
| 1715 | TRUE | Empty | Protein Zps384 OS-Mus musculus GN-Zps384 PE-1 SV-1                                                                                      | tr Q17465    | 51 Kda   | TRUE | 95% (0.0) | unknown | 2 | 2 |
| 1716 | TRUE | Empty | Protein Wdr36 OS-Mus musculus GN-Wdr36 PE-2 SV-1                                                                                        | tr Q17468    | 98 Kda   | TRUE | 95% (0.0) | unknown | 0 | 1 |
| 1717 | TRUE | Empty | Thioredoxin domain-containing protein 12 OS-Mus musculus GN-Trxd12 PE-2 SV-1                                                            | sp Q9CQU     | 19 Kda   | TRUE | 95% (INF) | unknown | 3 | 0 |
| 1718 | TRUE | Empty | Protein Ba2b OS-Mus musculus GN-Ba2b PE-4 SV-1                                                                                          | tr AZJAU     | 4234 Kda | TRUE | 95% (0.0) | unknown | 0 | 1 |
| 1719 | TRUE | Empty | Lamin B receptor OS-Mus musculus GN-Lbr PE-1 SV-2                                                                                       | sp Q9JUH7    | 61 Kda   | TRUE | 95% (0.0) | unknown | 0 | 1 |
| 1720 | TRUE | Empty | Kinetin OS-Mus musculus GN-Ktn1 PE-1 SV-1                                                                                               | tr F8VQC     | 153 Kda  | TRUE | 95% (0.0) | unknown | 0 | 3 |
| 1721 | TRUE | Empty | Protein Plekha5 OS-Mus musculus GN-Plekha5 PE-2 SV-1                                                                                    | tr E90G6     | 144 Kda  | TRUE | 95% (0.0) | unknown | 0 | 2 |
| 1722 | TRUE | Empty | UDP-glucuronosyltransferase 1-6 OS-Mus musculus GN-Ugt1b6 PE-1 SV-1                                                                     | sp Q64456    | 60 Kda   | TRUE | 95% (INF) | unknown | 6 | 0 |
| 1723 | TRUE | Empty | Phagocytosis-associated protein 3 OS-Mus musculus GN-Spat3 PE-2 SV-2                                                                    | sp Q90972    | 21 Kda   | TRUE | 95% (0.2) | unknown | 2 | 6 |
| 1724 | TRUE | Empty | Transmembrane protein 247 OS-Mus musculus GN-Tmem247 PE-2 SV-2                                                                          | sp Q90744    | 24 Kda   | TRUE | 95% (0.0) | unknown | 0 | 6 |
| 1725 | TRUE | Empty | Protamine-2 OS-Mus musculus GN-Frm2 PE-1 SV-1                                                                                           | sp Q90797    | 14 Kda   | TRUE | 95% (INF) | unknown | 5 | 0 |
| 1726 | TRUE | Empty | Antisense membrane protease serine 12 OS-Mus musculus GN-Tmpra12 PE-2 SV-1                                                              | sp Q3V047    | 37 Kda   | TRUE | 95% (0.0) | unknown | 3 | 5 |
| 1727 | TRUE | Empty | Ras-related protein Rab-6A OS-Mus musculus GN-Rab6a PE-1 SV-4                                                                           | tr P32774    | 24 Kda   | TRUE | 95% (INF) | unknown | 3 | 0 |
| 1728 | TRUE | Empty | Chromatin target of PRMT1 protein OS-Mus musculus GN-Ctop PE-2 SV-1                                                                     | tr EP9W20    | 22 Kda   | TRUE | 95% (0.0) | unknown | 0 | 5 |
| 1729 | TRUE | Empty | Nuclear autoantigenic sperm protein OS-Mus musculus GN-Nasp PE-4 SV-1                                                                   | tr B1AAU7    | 84 Kda   | TRUE | 95% (0.0) | unknown | 0 | 8 |
| 1730 | TRUE | Empty | Tyrosine phosphatase Fyn OS-Mus musculus GN-Fyn PE-2 SV-1                                                                               | tr Q31027    | 54 Kda   | TRUE | 0% (0.8)  | unknown | 3 | 3 |
| 1731 | TRUE | Empty | Lipoic acid acyltransferase component of branched-chain keto acid dehydrogenase complex, mitochondrial OS-Mus musculus GN-Ddt PE-2 SV-2 | sp P33353    | 53 Kda   | TRUE | 95% (1.0) | unknown | 2 | 4 |
| 1732 | TRUE | Empty | Leucine-rich repeat and guanylate kinase domain-containing protein OS-Mus musculus GN-Lrgik PE-2 SV-1                                   | sp Q8Q593    | 9 Kda    | TRUE | 0% (0.7)  | unknown | 2 | 3 |
| 1733 | TRUE | Empty | Cleavage and polyadenylation-specificity factor subunit 6 (Fragment) OS-Mus musculus GN-Cpsf6 PE-2 SV-1                                 | tr H3B8W     | 21 Kda   | TRUE | 0% (0.7)  | unknown | 2 | 3 |
| 1734 | TRUE | Empty | Protein Nuf21 OS-Mus musculus GN-Nuf21 PE-2 SV-1                                                                                        | sp Q54744    | 44 Kda   | TRUE | 0% (1.0)  | unknown | 3 | 3 |
| 1735 | TRUE | Empty | HORMA domain-containing protein 1 OS-Mus musculus GN-Horma1 PE-1 SV-1                                                                   | sp Q90574    | 5 Kda    | TRUE | 0% (0.7)  | unknown | 2 | 3 |
| 1736 | TRUE | Empty | Transducin beta-like protein 3 OS-Mus musculus GN-Tbl3 PE-2 SV-1                                                                        | sp Q8CA7     | 88 Kda   | TRUE | 0% (1.0)  | unknown | 3 | 3 |
| 1737 | TRUE | Empty | Zinc finger and BTB domain-containing protein 20 (Fragment) OS-Mus musculus GN-Zbtb20 PE-2 SV-1                                         | tr EOCYH     | 15 Kda   | TRUE | 0% (1.0)  | unknown | 3 | 3 |
| 1738 | TRUE | Empty | Transmembrane protein 23 OS-Mus musculus GN-Tmem23 PE-1 SV-1                                                                            | sp P12550    | 25 Kda   | TRUE | 95% (0.0) | unknown | 2 | 2 |
| 1739 | TRUE | Empty | Tex1 domain-containing protein 3 OS-Mus musculus GN-Txc3 PE-1 SV-2                                                                      | sp P11895    | 22 Kda   | TRUE | 0% (1.0)  | unknown | 2 | 2 |
| 1740 | TRUE | Empty | MORN repeat-containing protein 2 OS-Mus musculus GN-Morn2 PE-2 SV-1                                                                     | sp Q6U19     | 9 Kda    | TRUE | 0% (1.0)  | unknown | 3 | 3 |
| 1741 | TRUE | Empty | Probable RNA-processing protein EBP2 OS-Mus musculus GN-Ebp2 PE-2 SV-1                                                                  | sp Q90903    | 35 Kda   | TRUE | 0% (0.7)  | unknown | 2 | 3 |
| 1742 | TRUE | Empty | Bipartite domain protein L4, mitochondrial OS-Mus musculus GN-Mp4 PE-2 SV-1                                                             | sp Q91616    | 16 Kda   | TRUE | 95% (0.0) | unknown | 3 | 2 |
| 1743 | TRUE | Empty | U1 small nucleolar ribonucleoprotein A OS-Mus musculus GN-Serpa PE-2 SV-3                                                               | sp Q61818    | 92 Kda   | TRUE | 0% (0.6)  | unknown | 3 | 4 |
| 1744 | TRUE | Empty | Protein quaking OS-Mus musculus GN-Qki PE-1 SV-1                                                                                        | sp Q9QV53    | 38 Kda   | TRUE | 0% (1.0)  | unknown | 2 | 2 |
| 1745 | TRUE | Empty | Uncharacterized protein Chor117 homolog OS-Mus musculus PE-2 SV-1                                                                       | sp Q9V926    | 2 Kda    | TRUE | 0% (0.7)  | unknown | 2 | 3 |
| 1746 | TRUE | Empty | Lamin B-binding protein Musashi homolog 1 OS-Mus musculus GN-Mu1 PE-1 SV-1                                                              | sp Q90L47    | 49 Kda   | TRUE | 95% (0.0) | unknown | 2 | 3 |
| 1747 | TRUE | Empty | Coatomer subunit epsilon OS-Mus musculus GN-Cope PE-2 SV-3                                                                              | sp Q90793    | 95 Kda   | TRUE | 0% (1.0)  | unknown | 2 | 2 |
| 1748 | TRUE | Empty | MCG49550 OS-Mus musculus GN-B04807 PE-4 SV-1                                                                                            | tr Q8027     | 10 Kda   | TRUE | 0% (0.7)  | unknown | 2 | 4 |
| 1749 | TRUE | Empty | Electrin 8 OS-Mus musculus GN-Lg8 PE-2 SV-1                                                                                             | sp Q90L15    | 30 Kda   | TRUE | 0% (0.5)  | unknown | 3 | 4 |
| 1750 | TRUE | Empty | Ubiquitin carboxyl-terminal hydrolase 15 OS-Mus musculus GN-Usp15 PE-2 SV-1                                                             | sp Q8B5H1    | 112 Kda  | TRUE | 95% (0.3) | unknown | 1 | 3 |
| 1751 | TRUE | Empty | Nucleolar protein 7 OS-Mus musculus GN-No7 PE-1 SV-1                                                                                    | sp Q90723    | 9 Kda    | TRUE | 95% (0.3) | unknown | 1 | 3 |
| 1752 | TRUE |       |                                                                                                                                         |              |          |      |           |         |   |   |

|      |      |       |                                                                          |                                 |             |             |      |      |       |         |         |         |   |   |
|------|------|-------|--------------------------------------------------------------------------|---------------------------------|-------------|-------------|------|------|-------|---------|---------|---------|---|---|
| 1797 | TRUE | Empty | Chromosome alignment-maintaining phosphoprotein 1                        | OS-Mus musculus GN=Champ1       | PE=1 SV=1   | sp Q8K2788  | KDa  | 95%  | (0.0) | unknown | 0       | 2       |   |   |
| 1798 | TRUE | Empty | DnaI homolog subfamily B member 4                                        | OS-Mus musculus GN=DnaIb4       | PE=2 SV=1   | sp Q508238  | KDa  | TRUE | 95%   | (0.0)   | unknown | 0       | 1 |   |
| 1799 | TRUE | Empty | Spermoglycin-associated protein 17                                       | OS-Mus musculus GN=Spa17        | PE=2 SV=1   | sp Q505346  | KDa  | TRUE | 95%   | (0.0)   | unknown | 0       | 4 |   |
| 1800 | TRUE | Empty | Uncharacterized protein C7orf57 homolog OS-Mus musculus GN=Gm11992       | PE=2 SV=1                       | sp Q505590  | KDa         | TRUE | 95%  | (0.0) | unknown | 0       | 3       |   |   |
| 1801 | TRUE | Empty | Serine/threonine protein kinase 24                                       | OS-Mus musculus GN=SK24         | PE=1 SV=1   | sp Q99N48   | KDa  | TRUE | 95%   | (0.0)   | unknown | 0       | 1 |   |
| 1802 | TRUE | Empty | Nuclear pore complex protein Nup54                                       | OS-Mus musculus GN=Nup54        | PE=1 SV=1   | sp Q8B7546  | KDa  | TRUE | 95%   | (0.0)   | unknown | 0       | 3 |   |
| 1803 | TRUE | Empty | Protein PML OS-Mus musculus GN=Pml                                       | PE=1 SV=1                       | sp Q505538  | KDa         | TRUE | 95%  | (0.0) | unknown | 0       | 2       |   |   |
| 1804 | TRUE | Empty | Androgenin OS-Mus musculus GN=Andg                                       | PE=2 SV=1                       | tr J30MP3   | 189         | KDa  | TRUE | 95%   | (0.0)   | unknown | 0       | 3 |   |
| 1805 | TRUE | Empty | Nucleoporin-like protein 2                                               | OS-Mus musculus GN=Nupll2       | PE=2 SV=1   | sp Q8BC2    | 44   | KDa  | TRUE  | 95%     | (0.0)   | unknown | 0 | 2 |
| 1806 | TRUE | Empty | Helicase N13 methyltransferase D071 variant 1                            | OS-Mus musculus GN=Hd071        | PE=2 SV=1   | tr Q502L    | 165  | KDa  | TRUE  | 95%     | (0.0)   | unknown | 0 | 1 |
| 1807 | TRUE | Empty | HEAT repeat containing 1                                                 | OS-Mus musculus GN=Heat1        | PE=1 SV=1   | tr Q50X81   | 242  | KDa  | TRUE  | 95%     | (0.0)   | unknown | 0 | 2 |
| 1808 | TRUE | Empty | Protein Zfp597 OS-Mus musculus GN=Zfp597                                 | PE=2 SV=1                       | tr E9Q650   | 48          | KDa  | TRUE | 95%   | (0.0)   | unknown | 0       | 3 |   |
| 1809 | TRUE | Empty | Ankyrin repeat, SAM and basic leucine zipper domain-containing protein 1 | OS-Mus musculus GN=Asz1         | PE=1 SV=2   | sp Q8VW453  | KDa  | TRUE | 95%   | (INF)   | unknown | 3       | 0 |   |
| 1810 | TRUE | Empty | IQ motif-binding motif-containing protein 1                              | OS-Mus musculus GN=Iq1          | PE=1 SV=1   | sp Q8B9P05  | KDa  | TRUE | 95%   | (INF)   | unknown | 4       | 0 |   |
| 1811 | TRUE | Empty | DnaI homolog subfamily C member 8                                        | OS-Mus musculus GN=DnaIb8       | PE=2 SV=1   | sp Q50ZK20  | 30   | KDa  | TRUE  | 95%     | (0.0)   | unknown | 0 | 1 |
| 1812 | TRUE | Empty | NADH dehydrogenase [ubiquinone] iron-sulfur protein 3, mitochondrial     | OS-Mus musculus GN=Nduf3        | PE=1 SV=2   | sp Q8DCT30  | KDa  | TRUE | 95%   | (INF)   | unknown | 3       | 0 |   |
| 1813 | TRUE | Empty | PH-interacting protein OS-Mus musculus GN=Phip                           | PE=1 SV=2                       | sp Q8VWD207 | KDa         | TRUE | 95%  | (0.0) | unknown | 0       | 5       |   |   |
| 1814 | TRUE | Empty | Chromodomain Y-like protein OS-Mus musculus GN=CdyY                      | PE=1 SV=1                       | sp Q50VW65  | KDa         | TRUE | 95%  | (0.0) | unknown | 0       | 3       |   |   |
| 1815 | TRUE | Empty | Signal recognition particle subunit SRP68                                | OS-Mus musculus GN=Spr68        | PE=2 SV=1   | tr A2AM26   | 66   | KDa  | TRUE  | 95%     | (INF)   | unknown | 4 | 0 |
| 1816 | TRUE | Empty | 3-ketoacyl-CoA thiolase A, peroxisomal                                   | OS-Mus musculus GN=Acaa1a       | PE=2 SV=1   | sp Q921H44  | KDa  | TRUE | 95%   | (INF)   | unknown | 3       | 0 |   |
| 1817 | TRUE | Empty | Testis-expressed sequence 30                                             | OS-Mus musculus GN=Tex30        | PE=2 SV=1   | sp Q50TU25  | KDa  | TRUE | 95%   | (INF)   | unknown | 4       | 0 |   |
| 1818 | TRUE | Empty | Pf0-tiger protein 7                                                      | OS-Mus musculus GN=Pf7          | PE=1 SV=1   | sp Q50A0    | 35   | KDa  | TRUE  | 95%     | (INF)   | unknown | 4 | 0 |
| 1819 | TRUE | Empty | Protein E23000N13R8                                                      | OS-Mus musculus GN=E23000N13R8  | PE=2 SV=1   | tr J30N64   | 156  | KDa  | TRUE  | 95%     | (0.0)   | unknown | 0 | 2 |
| 1820 | TRUE | Empty | Catenin alpha-2                                                          | OS-Mus musculus GN=Cinn2        | PE=1 SV=1   | sp Q180105  | KDa  | TRUE | 95%   | (0.0)   | unknown | 0       | 2 |   |
| 1821 | TRUE | Empty | Nuclear receptor coactivator 2                                           | OS-Mus musculus GN=Ncoa2        | PE=1 SV=3   | sp Q501058  | KDa  | TRUE | 95%   | (0.0)   | unknown | 0       | 2 |   |
| 1822 | TRUE | Empty | Eukaryotic translation initiation factor 1b                              | OS-Mus musculus GN=EIF1b        | PE=2 SV=2   | sp Q50C913  | KDa  | TRUE | 95%   | (INF)   | unknown | 5       | 0 |   |
| 1823 | TRUE | Empty | Centrosomal protein of 57 kDa (Fragment)                                 | OS-Mus musculus GN=Ccp57        | PE=2 SV=1   | tr B8UJF132 | KDa  | TRUE | 95%   | (0.0)   | unknown | 0       | 4 |   |
| 1824 | TRUE | Empty | IQ domain-containing protein E                                           | OS-Mus musculus GN=Iqce         | PE=2 SV=1   | sp Q8PCQ86  | KDa  | TRUE | 0%    | (0.7)   | unknown | 2       | 3 |   |
| 1825 | TRUE | Empty | Endoplasmic reticulum resident protein 44                                | OS-Mus musculus GN=Erp44        | PE=1 SV=1   | sp Q501047  | KDa  | TRUE | 95%   | (2.0)   | unknown | 4       | 2 |   |
| 1826 | TRUE | Empty | APC-degradation factor 4                                                 | OS-Mus musculus GN=Acf4         | PE=2 SV=2   | sp P13750   | 20   | KDa  | TRUE  | 95%     | (1.0)   | unknown | 2 | 2 |
| 1827 | TRUE | Empty | Spindle and centrosome-associated protein 1                              | OS-Mus musculus GN=Spic1        | PE=1 SV=2   | sp Q8CB946  | KDa  | TRUE | 0%    | (1.0)   | unknown | 2       | 2 |   |
| 1828 | TRUE | Empty | Myosin regulatory light polypeptide 9                                    | OS-Mus musculus GN=My9          | PE=1 SV=3   | sp Q50C120  | KDa  | TRUE | 0%    | (1.0)   | unknown | 3       | 2 |   |
| 1829 | TRUE | Empty | Transcription activator B3                                               | OS-Mus musculus GN=Snaf4        | PE=1 SV=1   | sp Q3TK74   | 143  | KDa  | TRUE  | 0%      | (0.7)   | unknown | 3 | 3 |
| 1830 | TRUE | Empty | Long-chain fatty acid-CoA ligase 6                                       | OS-Mus musculus GN=Cacal6       | PE=2 SV=1   | sp Q501W    | 78   | KDa  | TRUE  | 95%     | (0.5)   | unknown | 1 | 2 |
| 1831 | TRUE | Empty | Protein phosphatase 1 regulatory subunit 42                              | OS-Mus musculus GN=Ppp142       | PE=1 SV=1   | sp Q8R12441 | KDa  | TRUE | 0%    | (1.5)   | unknown | 3       | 2 |   |
| 1832 | TRUE | Empty | Glutamate-rich WD repeat-containing protein 1                            | OS-Mus musculus GN=Gwrd1        | PE=2 SV=2   | sp Q810249  | KDa  | TRUE | 0%    | (0.7)   | unknown | 2       | 3 |   |
| 1833 | TRUE | Empty | Bardet-Biedl syndrome 7 protein homolog                                  | OS-Mus musculus GN=Bbs7         | PE=1 SV=1   | sp Q502320  | 290  | KDa  | TRUE  | 95%     | (0.3)   | unknown | 2 | 1 |
| 1834 | TRUE | Empty | Phosphoinositide protein 2                                               | OS-Mus musculus GN=Pi2          | PE=1 SV=1   | sp Q78Y632  | 128  | KDa  | TRUE  | 95%     | (2.0)   | unknown | 2 | 1 |
| 1835 | TRUE | Empty | Carbonyl reductase [NADPH]                                               | 1 OS-Mus musculus GN=Cbr1       | PE=1 SV=3   | sp P48758   | 31   | KDa  | TRUE  | 0%      | (1.0)   | unknown | 2 | 2 |
| 1836 | TRUE | Empty | Developmentally-regulated GTP-binding protein 1                          | OS-Mus musculus GN=Drg1         | PE=1 SV=1   | sp P32231   | 41   | KDa  | TRUE  | 95%     | (2.0)   | unknown | 2 | 1 |
| 1837 | TRUE | Empty | Bardet-Biedl syndrome 7 protein homolog                                  | OS-Mus musculus GN=Bbs7         | PE=2 SV=1   | sp Q8K2640  | KDa  | TRUE | 95%   | (0.5)   | unknown | 2       | 1 |   |
| 1838 | TRUE | Empty | Protein Scaf4                                                            | OS-Mus musculus GN=Scaf4        | PE=2 SV=1   | tr Q6PFF0   | 132  | KDa  | TRUE  | 95%     | (2.0)   | unknown | 2 | 1 |
| 1839 | TRUE | Empty | Probable E3 ubiquitin-protein ligase HERC4                               | OS-Mus musculus GN=Herca4       | PE=2 SV=2   | sp Q6P6V118 | KDa  | TRUE | 95%   | (0.5)   | unknown | 1       | 2 |   |
| 1840 | TRUE | Empty | Casein kinase I isoform delta (Fragment)                                 | OS-Mus musculus GN=Csk1d        | PE=1 SV=1   | tr F7A44    | 25   | KDa  | TRUE  | 95%     | (0.3)   | unknown | 1 | 3 |
| 1841 | TRUE | Empty | Acylphosphatase 1                                                        | OS-Mus musculus GN=Acp1         | PE=2 SV=2   | sp Q45637   | 31   | KDa  | TRUE  | 95%     | (1.0)   | unknown | 1 | 2 |
| 1842 | TRUE | Empty | Sulfide-quinone oxidoreductase, mitochondrial                            | OS-Mus musculus GN=Sqrfl        | PE=2 SV=3   | sp Q9R11250 | KDa  | TRUE | 95%   | (1.0)   | unknown | 3       | 1 |   |
| 1843 | TRUE | Empty | Mitochondrial import inner membrane translocase subunit Tim13            | OS-Mus musculus GN=Tim13        | PE=1 SV=1   | sp P62075   | 10   | KDa  | TRUE  | 0%      | (1.0)   | unknown | 2 | 2 |
| 1844 | TRUE | Empty | NADH dehydrogenase [ubiquinone] 1 alpha subcomplex subunit 6             | OS-Mus musculus GN=Ndufa6       | PE=1 SV=1   | sp Q50C215  | KDa  | TRUE | 95%   | (2.0)   | unknown | 2       | 2 |   |
| 1845 | TRUE | Empty | Thioredoxin domain-containing protein 5                                  | OS-Mus musculus GN=Trxd5        | PE=2 SV=1   | sp E8P4X1   | 159  | KDa  | TRUE  | 95%     | (0.3)   | unknown | 2 | 1 |
| 1846 | TRUE | Empty | Lysine-rich nuclear protein 1                                            | OS-Mus musculus GN=Lncp1        | PE=1 SV=2   | sp Q50Z254  | KDa  | TRUE | 0%    | (1.5)   | unknown | 3       | 2 |   |
| 1847 | TRUE | Empty | Uncharacterized protein C20orf201                                        | OS-Mus musculus GN=C20orf201    | PE=2 SV=1   | sp Q8B622   | 22   | KDa  | TRUE  | 0%      | (1.0)   | unknown | 2 | 2 |
| 1848 | TRUE | Empty | Gamma-adducin OS-Mus musculus GN=Adg3                                    | PE=1 SV=2                       | sp Q8YH179  | KDa         | TRUE | 95%  | (2.0) | unknown | 2       | 1       |   |   |
| 1849 | TRUE | Empty | WD repeat-containing protein 19                                          | OS-Mus musculus GN=Wdr19        | PE=1 SV=1   | sp Q3UGT155 | KDa  | TRUE | 0%    | (1.0)   | unknown | 4       | 1 |   |
| 1850 | TRUE | Empty | Probable threonine protease PRSS50                                       | OS-Mus musculus GN=Prss50       | PE=2 SV=1   | sp Q8U1M49  | KDa  | TRUE | 95%   | (0.3)   | unknown | 1       | 3 |   |
| 1851 | TRUE | Empty | Paired amphipathic helix protein Sin3a                                   | OS-Mus musculus GN=Sin3a        | PE=1 SV=3   | sp Q505204  | 163  | KDa  | TRUE  | 95%     | (0.5)   | unknown | 1 | 2 |
| 1852 | TRUE | Empty | WD repeat-containing protein 53                                          | OS-Mus musculus GN=Wdr53        | PE=2 SV=1   | sp Q50B08   | 39   | KDa  | TRUE  | 95%     | (1.0)   | unknown | 1 | 1 |
| 1853 | TRUE | Empty | Actin exchange regulatory cofactor NHEK3                                 | OS-Mus musculus GN=Nhe3         | PE=1 SV=1   | sp Q50J41   | 56   | KDa  | TRUE  | 95%     | (1.0)   | unknown | 2 | 2 |
| 1854 | TRUE | Empty | Uncharacterized protein C17orf104                                        | OS-Mus musculus GN=Gm1564       | PE=2 SV=1   | sp A2AG60   | 109  | KDa  | TRUE  | 95%     | (INF)   | unknown | 2 | 0 |
| 1855 | TRUE | Empty | Pescadillo homolog OS-Mus musculus GN=Pe1                                | PE=1 SV=1                       | sp Q8E068   | 168         | KDa  | TRUE | 95%   | (0.0)   | unknown | 0       | 3 |   |
| 1856 | TRUE | Empty | Nucleolar protein 1                                                      | OS-Mus musculus GN=Np1          | PE=2 SV=1   | sp Q8B8W81  | KDa  | TRUE | 95%   | (0.0)   | unknown | 0       | 3 |   |
| 1857 | TRUE | Empty | Diacylglycerol kinase epsilon                                            | OS-Mus musculus GN=Dgke         | PE=2 SV=1   | tr J22650   | 46   | KDa  | TRUE  | 95%     | (0.0)   | unknown | 0 | 2 |
| 1858 | TRUE | Empty | Lysine-specific histone demethylase 1A (Fragment)                        | OS-Mus musculus GN=Kdm1a        | PE=4 SV=1   | tr G8L40    | 76   | KDa  | TRUE  | 95%     | (0.3)   | unknown | 1 | 3 |
| 1859 | TRUE | Empty | AP-1 complex subunit beta-3                                              | OS-Mus musculus GN=Apb13        | PE=2 SV=1   | tr Q50V64   | 102  | KDa  | TRUE  | 0%      | (0.8)   | unknown | 1 | 1 |
| 1860 | TRUE | Empty | Acyl-CoA dehydrogenase, mitochondrial                                    | OS-Mus musculus GN=Cad9b        | PE=2 SV=2   | sp Q50D70   | 121  | KDa  | TRUE  | 95%     | (0.0)   | unknown | 4 | 0 |
| 1861 | TRUE | Empty | Serine/threonine protein kinase 33                                       | OS-Mus musculus GN=SK33         | PE=1 SV=2   | sp Q52AK74  | KDa  | TRUE | 0%    | (1.5)   | unknown | 3       | 2 |   |
| 1862 | TRUE | Empty | Nucleolar protein 16                                                     | OS-Mus musculus GN=Np16         | PE=2 SV=1   | sp Q8PCT51  | KDa  | TRUE | 95%   | (0.3)   | unknown | 1       | 3 |   |
| 1863 | TRUE | Empty | Obg-like ATPase 1                                                        | OS-Mus musculus GN=Ob1          | PE=2 SV=1   | tr B1AY19   | 32   | KDa  | TRUE  | 0%      | (1.5)   | unknown | 3 | 2 |
| 1864 | TRUE | Empty | Protein L22-like 1                                                       | OS-Mus musculus GN=L22l1        | PE=1 SV=1   | sp Q507174  | KDa  | TRUE | 95%   | (0.0)   | unknown | 2       | 1 |   |
| 1865 | TRUE | Empty | 26S proteasome non-ATPase regulatory subunit 6                           | OS-Mus musculus GN=Psm6         | PE=1 SV=1   | sp Q9YH14   | 46   | KDa  | TRUE  | 95%     | (2.0)   | unknown | 2 | 1 |
| 1866 | TRUE | Empty | Charged multivesicular body protein 3                                    | OS-Mus musculus GN=Cmp3         | PE=1 SV=3   | sp Q50C125  | KDa  | TRUE | 95%   | (3.0)   | unknown | 3       | 1 |   |
| 1867 | TRUE | Empty | U1 small nuclear ribonucleoprotein C                                     | OS-Mus musculus GN=U1c          | PE=2 SV=1   | sp Q522417  | 137  | KDa  | TRUE  | 0%      | (1.0)   | unknown | 3 | 3 |
| 1868 | TRUE | Empty | Actin-depolymerizing-associated protein 1                                | OS-Mus musculus GN=Actd1        | PE=2 SV=1   | sp Q502359  | KDa  | TRUE | 95%   | (0.3)   | unknown | 1       | 2 |   |
| 1869 | TRUE | Empty | ER01-like protein beta                                                   | OS-Mus musculus GN=Er01b        | PE=2 SV=1   | sp Q8R2154  | KDa  | TRUE | 0%    | (0.7)   | unknown | 2       | 3 |   |
| 1870 | TRUE | Empty | Eukaryotic translation initiation factor 4H                              | OS-Mus musculus GN=EIF4H        | PE=1 SV=3   | sp Q50WU27  | KDa  | TRUE | 95%   | (2.0)   | unknown | 2       | 1 |   |
| 1871 | TRUE | Empty | SUN domain-containing protein 5                                          | OS-Mus musculus GN=Sun5         | PE=2 SV=2   | sp Q50A043  | KDa  | TRUE | 95%   | (0.5)   | unknown | 1       | 2 |   |
| 1872 | TRUE | Empty | Cationic amino acid-dependent protein kinase type IV                     | OS-Mus musculus GN=Cakm4        | PE=1 SV=2   | sp P8414    | 53   | KDa  | TRUE  | 95%     | (0.0)   | unknown | 1 | 2 |
| 1873 | TRUE | Empty | Copper homeostasis protein cutc                                          | OS-Mus musculus GN=Cutc         | PE=2 SV=1   | sp Q908R129 | KDa  | TRUE | 95%   | (2.0)   | unknown | 2       | 1 |   |
| 1874 | TRUE | Empty | Sortilin nexin-9                                                         | OS-Mus musculus GN=Sn9          | PE=1 SV=1   | sp Q501W67  | KDa  | TRUE | 95%   | (0.0)   | unknown | 0       | 2 |   |
| 1875 | TRUE | Empty | Lectin-rich repeat-containing protein 57                                 | OS-Mus musculus GN=Lrc57        | PE=2 SV=1   | sp Q501G27  | KDa  | TRUE | 95%   | (2.0)   | unknown | 2       | 1 |   |
| 1876 | TRUE | Empty | Tubulin alpha 1 chain                                                    | OS-Mus musculus GN=Tuba1a       | PE=1 SV=2   | sp P81213   | 50   | KDa  | TRUE  | 95%     | (0.0)   | unknown | 2 | 3 |
| 1877 | TRUE | Empty | Cathepsin B                                                              | OS-Mus musculus GN=Ctbp         | PE=1 SV=2   | sp P10655   | 37   | KDa  | TRUE  | 95%     | (0.5)   | unknown | 2 | 4 |
| 1878 | TRUE | Empty | Selinger, water dikinase 2                                               | OS-Mus musculus GN=Sehd2        | PE=1 SV=3   | sp P97364   | 48   | KDa  | TRUE  | 0%      | (0.7)   | unknown | 2 | 3 |
| 1879 | TRUE | Empty | Glucocorticoid-associated protein 1A/1B light chain 3A                   | OS-Mus musculus GN=Map13a       | PE=1 SV=1   | sp Q501W74  | KDa  | TRUE | 95%   | (0.7)   | unknown | 3       | 3 |   |
| 1880 | TRUE | Empty | Brain acid soluble protein 1                                             | OS-Mus musculus GN=Basp1        | PE=1 SV=3   | sp Q501X22  | KDa  | TRUE | 0%    | (1.0)   | unknown | 3       | 3 |   |
| 1881 | TRUE | Empty | NADH dehydrogenase [ubiquinone] 1 alpha subcomplex subunit 2             | OS-Mus musculus GN=Ndufa2       | PE=1 SV=3   | sp Q50C711  | KDa  | TRUE | 0%    | (1.0)   | unknown | 3       | 3 |   |
| 1882 | TRUE | Empty | Glucose-induced degradation protein 8                                    | OS-Mus musculus GN=Gid8         | PE=2 SV=1   | sp Q507M27  | KDa  | TRUE | 95%   | (0.3)   | unknown | 1       | 3 |   |
| 1883 | TRUE | Empty | APC8-OS-Mus musculus GN=Ap8                                              | PE=1 SV=1                       | tr A2ALC    | 47          | KDa  | TRUE | 95%   | (0.2)   | unknown | 4       | 3 |   |
| 1884 | TRUE | Empty | Dynein heavy chain 12, axonemal (Fragment)                               | OS-Mus musculus GN=Dnah12       | PE=2 SV=1   | tr F5QAS5   | 152  | KDa  | TRUE  | 0%      | (0.7)   | unknown | 2 | 3 |
| 1885 | TRUE | Empty | Protein Rpl39                                                            | OS-Mus musculus GN=Rpl39        | PE=3 SV=1   | tr Q9DQ06   | 63   | KDa  | TRUE  | 95%     | (0.3)   | unknown | 1 | 3 |
| 1886 | TRUE | Empty | Estradiol 17-beta-dehydrogenase 8                                        | OS-Mus musculus GN=Hsd17b8      | PE=1 SV=2   | sp P50171   | 27   | KDa  | TRUE  | 95%     | (INF)   | unknown | 1 | 0 |
| 1887 | TRUE | Empty | 1700038808R8 (Fragment)                                                  | OS-Mus musculus GN=1700038808R8 | PE=4 SV=1   | sp E8P173   | 121  | KDa  | TRUE  | 95%     | (0.0)   | unknown | 2 | 1 |
| 1888 | TRUE | Empty | WD repeat-containing protein 48                                          | OS-Mus musculus GN=Wdr48        | PE=1 SV=1   | sp Q8B8576  | KDa  | TRUE | 95%   | (0.0)   | unknown | 0       | 1 |   |
| 1889 | TRUE | Empty | Nuclear cap-binding protein subunit 2                                    | OS-Mus musculus GN=Ncbp2        | PE=1 SV=1   | sp Q9CA418  | KDa  | TRUE | 95%   | (0.0)   | unknown | 0       | 3 |   |
| 1890 | TRUE | Empty | 60S ribosome subunit biogenesis protein NUP7                             | OS-Mus musculus GN=Nup7         | PE=2 SV=1   | sp Q8CK820  | KDa  | TRUE | 95%   | (0.0)   | unknown | 0       | 3 |   |
| 1891 | TRUE | Empty | Uncharacterized protein C10orf63                                         | OS-Mus musculus GN=C10orf63     | PE=2 SV=1   | sp Q8Y9348  | KDa  | TRUE | 95%   | (0.0)   | unknown | 0       | 3 |   |
| 1892 | TRUE | Empty | Cirhin OS-Mus musculus GN=Cir1a                                          | PE=2 SV=3                       | sp Q8R2N77  | KDa         | TRUE | 95%  | (0.0) | unknown | 0       | 3       |   |   |
| 1893 | TRUE | Empty | Steroidogenic factor 1                                                   | OS-Mus musculus GN=Nsf4         | PE=1 SV=3   | sp P33242   | 51   | KDa  | TRUE  | 95%     | (0.0)   | unknown | 0 | 2 |
| 1894 | TRUE | Empty |                                                                          |                                 |             |             |      |      |       |         |         |         |   |   |

|      |      |       |                                                                                                                                   |                   |           |           |         |   |   |
|------|------|-------|-----------------------------------------------------------------------------------------------------------------------------------|-------------------|-----------|-----------|---------|---|---|
| 1950 | TRUE | Empty | Trafficking protein particle complex subunit 9 OS-Mus musculus GN-Trapp9 PE-1 SV-2                                                | sp Q3J0UM.128.kda | 95% (0.5) | unknown   | 1       | 2 |   |
| 1951 | TRUE | Empty | Tylosin-related binding factor 2 OS-Mus musculus GN-TerF2 PE-1 SV-3                                                               | sp O3514440.kda   | 95% (0.0) | unknown   | 0       | 2 |   |
| 1952 | TRUE | Empty | Protein-degrading enzyme OS-Mus musculus GN-Idr-18.kda                                                                            | sp Q51RQ7.118.kda | 95% (0.0) | unknown   | 0       | 2 |   |
| 1953 | TRUE | Empty | Cytoskeletal dynein 2 heavy chain 1 OS-Mus musculus GN-Dyn2H1 PE-1 SV-1                                                           | sp Q45VW.492.kda  | 95% (0.0) | unknown   | 0       | 1 |   |
| 1954 | TRUE | Empty | N-alpha-acetyltransferase 35, NAIC auxiliary subunit OS-Mus musculus GN-Naa35 PE-1 SV-1                                           | sp Q6PHQ.831.kda  | 95% (0.0) | unknown   | 0       | 1 |   |
| 1955 | TRUE | Empty | N-alpha-acetyltransferase 35, NAIC auxiliary subunit OS-Mus musculus GN-Naa35 PE-1 SV-1                                           | sp Q6PHQ.831.kda  | 95% (0.0) | unknown   | 0       | 1 |   |
| 1956 | TRUE | Empty | U3 snRNP-associated protein 4 OS-Mus musculus GN-U3AP4 PE-2 SV-1                                                                  | sp Q8K21511.kda   | 95% (0.0) | unknown   | 2       | 0 |   |
| 1957 | TRUE | Empty | Cytochrome b5 type B OS-Mus musculus GN-Cyb5b PE-1 SV-1                                                                           | sp Q9CXK.16.kda   | 95% (2.0) | unknown   | 2       | 1 |   |
| 1958 | TRUE | Empty | Electron transfer flavoprotein subunit beta OS-Mus musculus GN-Etfb PE-1 SV-3                                                     | sp Q9C9K.28.kda   | 95% (0.5) | unknown   | 1       | 2 |   |
| 1959 | TRUE | Empty | Pfaffin-2 OS-Mus musculus GN-Pf2 PE-1 SV-3                                                                                        | sp Q9JUV.15.kda   | 95% (1.0) | unknown   | 1       | 1 |   |
| 1960 | TRUE | Empty | Basigin OS-Mus musculus GN-Big PE-1 SV-2                                                                                          | sp P4852.42.kda   | 0% (0.7)  | unknown   | 2       | 3 |   |
| 1961 | TRUE | Empty | Elongation factor 1-delta (Fragment) OS-Mus musculus GN-Ef1d PE-2 SV-1                                                            | tr E9PMU.25.kda   | TRUE      | 0% (0.8)  | unknown | 2 | 3 |
| 1962 | TRUE | Empty | U4U6 small nuclear ribonucleoprotein Pnp3 OS-Mus musculus GN-Pnp3 PE-1 SV-1                                                       | sp Q9Z2U.777.kda  | 95% (0.3) | unknown   | 1       | 3 |   |
| 1963 | TRUE | Empty | Translationaly-controlled tumor protein OS-Mus musculus GN-Tp1 PE-1 SV-1                                                          | sp Q93025.19.kda  | 95% (0.0) | unknown   | 2       | 1 |   |
| 1964 | TRUE | Empty | Acrosin-binding protein OS-Mus musculus GN-Acbrp PE-2 SV-1                                                                        | sp Q13V4615.kda   | 95% (0.5) | unknown   | 1       | 2 |   |
| 1965 | TRUE | Empty | Probable ATP-dependent RNA helicase DDx6 OS-Mus musculus GN-Ddx6 PE-1 SV-1                                                        | sp P54823.54.kda  | 95% (0.5) | unknown   | 1       | 2 |   |
| 1966 | TRUE | Empty | Ankyrin repeat domain-containing protein 42 OS-Mus musculus GN-Ankr42 PE-2 SV-1                                                   | sp Q95M9599.kda   | 95% (0.5) | unknown   | 1       | 2 |   |
| 1967 | TRUE | Empty | Ras-related protein Rab14 OS-Mus musculus GN-Rab14 PE-1 SV-3                                                                      | sp Q951M.126.kda  | TRUE      | 0% (1.0)  | unknown | 1 | 2 |
| 1968 | TRUE | Empty | Spermatid perinuclear RNA-binding protein OS-Mus musculus GN-Strbp PE-1 SV-1                                                      | sp Q91W.74.kda    | TRUE      | 0% (0.6)  | unknown | 1 | 1 |
| 1969 | TRUE | Empty | TATA box binding protein OS-Mus musculus GN-Tbp PE-2 SV-1                                                                         | tr Q91W.528.kda   | 95% (0.5) | unknown   | 1       | 2 |   |
| 1970 | TRUE | Empty | Centrosomal protein of 63 kDa OS-Mus musculus GN-Cepp3 PE-2 SV-2                                                                  | sp Q9JPF.80.kda   | 95% (0.5) | unknown   | 1       | 2 |   |
| 1971 | TRUE | Empty | PHD finger protein 1 OS-Mus musculus GN-PHF1 PE-1 SV-2                                                                            | sp Q9283861.kda   | 95% (0.5) | unknown   | 1       | 2 |   |
| 1972 | TRUE | Empty | Glycopeptide N-tetradecanoyltransferase 1 OS-Mus musculus GN-Ntm1 PE-1 SV-1                                                       | sp Q7031057.kda   | TRUE      | 0% (0.7)  | unknown | 1 | 1 |
| 1973 | TRUE | Empty | Transcription factor EB OS-Mus musculus GN-Tfeb PE-1 SV-2                                                                         | sp Q9281053.kda   | 95% (0.0) | unknown   | 0       | 1 |   |
| 1974 | TRUE | Empty | Centromere protein 1J OS-Mus musculus GN-HMFP2 PE-2 SV-1                                                                          | sp Q9C4M.46.kda   | 0% (1.0)  | unknown   | 2       | 2 |   |
| 1975 | TRUE | Empty | DnaI homolog subfamily B member 8 OS-Mus musculus GN-DnaIb PE-2 SV-1                                                              | sp Q93V.25.kda    | 95% (0.5) | unknown   | 1       | 2 |   |
| 1976 | TRUE | Empty | Rab11 family-interacting protein 5 OS-Mus musculus GN-Rab11IP5 PE-1 SV-2                                                          | sp Q8R36.170.kda  | 95% (2.0) | unknown   | 2       | 1 |   |
| 1977 | TRUE | Empty | Target of EGR1 protein 1 OS-Mus musculus GN-Toe1 PE-2 SV-1                                                                        | sp Q920T.217.kda  | 95% (0.0) | unknown   | 0       | 1 |   |
| 1978 | TRUE | Empty | Protein Fam170b OS-Mus musculus GN-Fam170b PE-2 SV-1                                                                              | tr E9PXT.144.kda  | 0% (1.0)  | unknown   | 1       | 1 |   |
| 1979 | TRUE | Empty | Caseinolytic protein-associated protein subunit beta OS-Mus musculus GN-Catperb PE-1 SV-1                                         | tr A9TYS.128.kda  | 95% (0.0) | unknown   | 2       | 1 |   |
| 1980 | TRUE | Empty | Extended synaptotagmin-3 OS-Mus musculus GN-Esyt3 PE-2 SV-2                                                                       | sp Q5D70.180.kda  | 95% (2.0) | unknown   | 2       | 1 |   |
| 1981 | TRUE | Empty | Acidic leucine-rich nuclear phosphoprotein 32 family member B OS-Mus musculus GN-Anp32b PE-1 SV-1                                 | sp Q8E375.31.kda  | 95% (0.0) | unknown   | 4       | 0 |   |
| 1982 | TRUE | Empty | Eukaryotic translation initiation factor 3 subunit 1 OS-Mus musculus GN-Eif3 PE-1 SV-1                                            | sp Q92D167.kda    | 95% (0.0) | unknown   | 0       | 2 |   |
| 1983 | TRUE | Empty | PQZ domain-containing protein 1 OS-Mus musculus GN-PQZ1 PE-1 SV-1                                                                 | sp Q92CF.22.kda   | 95% (0.0) | unknown   | 0       | 2 |   |
| 1984 | TRUE | Empty | Protein FAM183b OS-Mus musculus GN-Fam183b PE-2 SV-2                                                                              | sp Q9NSC.16.kda   | 95% (0.0) | unknown   | 0       | 2 |   |
| 1985 | TRUE | Empty | Phospholipase D3 OS-Mus musculus GN-PLD3 PE-2 SV-1                                                                                | sp Q35495.54.kda  | 0% (1.0)  | unknown   | 1       | 1 |   |
| 1986 | TRUE | Empty | MtCA959 family class II alpha-2 OS-Mus musculus GN-MtCA959 PE-2 SV-1                                                              | tr Q8B67.25.kda   | TRUE      | 0% (1.0)  | unknown | 0 | 1 |
| 1987 | TRUE | Empty | AP-2 complex subunit alpha-2 OS-Mus musculus GN-Ap2a2 PE-1 SV-2                                                                   | tr P4747.104.kda  | TRUE      | 0% (0.0)  | unknown | 0 | 1 |
| 1988 | TRUE | Empty | Protein 1700003f12Rk OS-Mus musculus GN-1700003f12Rk PE-2 SV-1                                                                    | tr JAZAK5.24.kda  | 95% (3.0) | unknown   | 3       | 1 |   |
| 1989 | TRUE | Empty | 60S ribosomal protein L19 OS-Mus musculus GN-Rpl19 PE-2 SV-2                                                                      | sp Q62892.6.kda   | 0% (1.0)  | unknown   | 2       | 2 |   |
| 1990 | TRUE | Empty | Ig kappa chain C region OS-Mus musculus GN-C PE-1 SV-1                                                                            | sp P8127.12.kda   | 95% (3.0) | unknown   | 3       | 1 |   |
| 1991 | TRUE | Empty | Pyruvate dehydrogenase E1 component subunit alpha, somatic form, mitochondrial OS-Mus musculus GN-Pdh1 PE-1 SV-1                  | sp P35486.43.kda  | 95% (3.0) | unknown   | 3       | 1 |   |
| 1992 | TRUE | Empty | Fatty aldehyde dehydrogenase OS-Mus musculus GN-Aldh3a2 PE-2 SV-2                                                                 | sp P4740.54.kda   | 0% (0.7)  | unknown   | 2       | 3 |   |
| 1993 | TRUE | Empty | N-alpha-acetyltransferase 38, NAIC auxiliary subunit OS-Mus musculus GN-Naa38 PE-3 SV-3                                           | sp Q6Z6W.20.kda   | 0% (0.7)  | unknown   | 2       | 3 |   |
| 1994 | TRUE | Empty | Methylcysteinecarboxylase glucosylase OS-Mus musculus GN-Mcglu PE-2 SV-1                                                          | sp Q8U9A.92.kda   | 95% (1.0) | unknown   | 2       | 2 |   |
| 1995 | TRUE | Empty | Zinc finger protein 706 OS-Mus musculus GN-Zfp706 PE-2 SV-1                                                                       | sp Q9D118.8.kda   | 95% (1.0) | unknown   | 2       | 2 |   |
| 1996 | TRUE | Empty | Peptidyl-prolyl cis-trans isomerase H OS-Mus musculus GN-Pph PE-2 SV-1                                                            | sp Q908620.2.kda  | 95% (2.0) | unknown   | 2       | 1 |   |
| 1997 | TRUE | Empty | Protein Xba4 OS-Mus musculus GN-Xba4 PE-2 SV-1                                                                                    | tr A2840.25.kda   | 0% (1.0)  | unknown   | 2       | 2 |   |
| 1998 | TRUE | Empty | Tekin Zfp207 OS-Mus musculus GN-Zfp207 PE-1 SV-1                                                                                  | sp E9PWT.151.kda  | 95% (1.0) | unknown   | 2       | 2 |   |
| 1999 | TRUE | Empty | 493435F23Rk OS-Mus musculus GN-493435F23Rk PE-2 SV-1                                                                              | tr Q9148.17.kda   | 0% (1.0)  | unknown   | 2       | 2 |   |
| 2000 | TRUE | Empty | Septin-4 (Fragment) OS-Mus musculus GN-Sept4 PE-2 SV-1                                                                            | tr Q9N1824.kda    | TRUE      | 0% (0.7)  | unknown | 2 | 3 |
| 2001 | TRUE | Empty | Cytochrome c oxidase subunit 7A2, mitochondrial OS-Mus musculus GN-Cox7a2 PE-1 SV-2                                               | sp P4877.9.kda    | 95% (0.0) | unknown   | 2       | 0 |   |
| 2002 | TRUE | Empty | 200211739 OS-Mus musculus GN-GM17359 PE-4 SV-1                                                                                    | sp Q92AM.22.kda   | 95% (0.0) | unknown   | 2       | 0 |   |
| 2003 | TRUE | Empty | Long-chain fatty-acyl-CoA ligase 3 OS-Mus musculus GN-Acsl3 PE-2 SV-2                                                             | sp Q92CW.80.kda   | 95% (0.0) | unknown   | 1       | 0 |   |
| 2004 | TRUE | Empty | Ras-related protein Rab31 OS-Mus musculus GN-Rab31 PE-1 SV-1                                                                      | sp Q92121.11.kda  | 95% (0.0) | unknown   | 2       | 0 |   |
| 2005 | TRUE | Empty | Unconventional myosin-VI OS-Mus musculus GN-Myo6 PE-2 SV-1                                                                        | tr E9PVP.148.kda  | TRUE      | 95% (0.0) | unknown | 3 | 1 |
| 2006 | TRUE | Empty | U3 small nuclear ribonucleoprotein (MNP) OS-Mus musculus GN-Mnp PE-2 SV-1                                                         | sp Q92Y1222.kda   | 95% (0.0) | unknown   | 0       | 2 |   |
| 2007 | TRUE | Empty | Leucine-rich repeat and IQ domain-containing protein 4 OS-Mus musculus GN-Lrrqf4 PE-2 SV-1                                        | sp JA6H6A.68.kda  | 95% (0.0) | unknown   | 1       | 0 |   |
| 2008 | TRUE | Empty | Small nuclear ribonucleoprotein F OS-Mus musculus GN-Srfp PE-2 SV-1                                                               | sp P36307.10.kda  | 95% (0.0) | unknown   | 0       | 1 |   |
| 2009 | TRUE | Empty | Ras-related protein Rab-8 OS-Mus musculus GN-Rab8 PE-2 SV-1                                                                       | sp Q93W.93.kda    | 95% (0.0) | unknown   | 0       | 1 |   |
| 2010 | TRUE | Empty | Centrosomal protein of 78 kDa OS-Mus musculus GN-Cep78 PE-2 SV-1                                                                  | sp Q9GUR.87.kda   | 95% (0.0) | unknown   | 0       | 1 |   |
| 2011 | TRUE | Empty | Adenylyl cyclase-associated protein 2 OS-Mus musculus GN-Cap2 PE-1 SV-1                                                           | sp Q9CYT.53.kda   | 95% (0.0) | unknown   | 0       | 1 |   |
| 2012 | TRUE | Empty | Sperm-associated antigen 4 protein OS-Mus musculus GN-Spa4 PE-2 SV-3                                                              | sp Q9JUF.49.kda   | 95% (0.0) | unknown   | 0       | 3 |   |
| 2013 | TRUE | Empty | Y1 half-binding domain-containing protein 2 OS-Mus musculus GN-Efca2 PE-2 SV-1                                                    | sp Q92C4169.kda   | 95% (0.0) | unknown   | 1       | 0 |   |
| 2014 | TRUE | Empty | Uncharacterized protein C16orf53 homolog OS-Mus musculus PE-2 SV-1                                                                | sp Q8C82415.kda   | 95% (0.0) | unknown   | 0       | 2 |   |
| 2015 | TRUE | Empty | Gluathione S-transferase theta 3 OS-Mus musculus GN-Gstt3 PE-2 SV-1                                                               | tr Q9L20.27.kda   | 95% (0.0) | unknown   | 0       | 1 |   |
| 2016 | TRUE | Empty | Mitogen-activated protein kinase-binding protein 1 OS-Mus musculus GN-Mapkb1 PE-1 SV-1                                            | sp Q9NSY.163.kda  | 95% (0.0) | unknown   | 2       | 0 |   |
| 2017 | TRUE | Empty | 1,6-naphthylquinone 1-associated protein 1 OS-Mus musculus GN-1nq1 PE-1 SV-1                                                      | sp Q8B84.159.kda  | 95% (0.0) | unknown   | 0       | 2 |   |
| 2018 | TRUE | Empty | A-kinase anchor protein 12 OS-Mus musculus GN-Akap2 PE-1 SV-1                                                                     | sp Q9W70.181.kda  | 95% (0.0) | unknown   | 0       | 2 |   |
| 2019 | TRUE | Empty | S1 RNA-binding domain-containing protein 1 OS-Mus musculus GN-Srbd1 PE-2 SV-1                                                     | tr F8WVW.110.kda  | 95% (0.0) | unknown   | 1       | 0 |   |
| 2020 | TRUE | Empty | ATP-dependent Clp protease ATP-binding subunit dpx-like, mitochondrial OS-Mus musculus GN-Cpx PE-1 SV-2                           | sp Q95H5.69.kda   | 95% (0.0) | unknown   | 3       | 0 |   |
| 2021 | TRUE | Empty | Glucanase 1 domain-containing protein 1 OS-Mus musculus GN-Glc1 PE-2 SV-1                                                         | sp Q91467.61.kda  | 95% (0.0) | unknown   | 2       | 0 |   |
| 2022 | TRUE | Empty | N-alpha-acetyltransferase 15, NAIA auxiliary subunit OS-Mus musculus GN-Naa15 PE-1 SV-1                                           | sp Q8U9M.101.kda  | 95% (0.0) | unknown   | 1       | 0 |   |
| 2023 | TRUE | Empty | Cleavage and polyadenylation specificity factor subunit 3 OS-Mus musculus GN-Cpsf3 PE-1 SV-2                                      | sp Q9DQK.78.kda   | 95% (0.0) | unknown   | 1       | 0 |   |
| 2024 | TRUE | Empty | Endoplasmic reticulum lectin 1 OS-Mus musculus GN-Erlec1 PE-2 SV-1                                                                | sp Q9VH55.kda     | 95% (0.0) | unknown   | 1       | 0 |   |
| 2025 | TRUE | Empty | Tecmin OS-Mus musculus GN-Tecmin PE-2 SV-2                                                                                        | sp Q9VH151.kda    | 95% (0.0) | unknown   | 1       | 0 |   |
| 2026 | TRUE | Empty | Ubiquitin-like modifier-activating enzyme 1 OS-Mus musculus GN-Uba1 PE-2 SV-2                                                     | sp P31254.118.kda | TRUE      | 95% (0.0) | unknown | 2 | 0 |
| 2027 | TRUE | Empty | TfIIIB basal transcription factor complex helicase XPB subunit OS-Mus musculus GN-Ercc2 PE-2 SV-2                                 | sp Q981187.kda    | 95% (0.0) | unknown   | 1       | 0 |   |
| 2028 | TRUE | Empty | Nrl1 protein OS-Mus musculus GN-Nrl1 PE-2 SV-1                                                                                    | sp E9R72.57.kda   | 95% (0.0) | unknown   | 0       | 2 |   |
| 2029 | TRUE | Empty | P2 motif-containing protein 1 OS-Mus musculus GN-P2 PE-2 SV-2                                                                     | tr D1WVQ.124.kda  | 95% (0.0) | unknown   | 0       | 4 |   |
| 2030 | TRUE | Empty | Synaptotagmin-associated protein 21 OS-Mus musculus GN-Spata21 PE-2 SV-1                                                          | sp Q8BHW.76.kda   | 95% (0.0) | unknown   | 0       | 1 |   |
| 2031 | TRUE | Empty | Eukaryotic translation initiation factor 4 gamma 2 OS-Mus musculus GN-Eif4g PE-1 SV-2                                             | sp Q24484.102.kda | 95% (0.0) | unknown   | 2       | 0 |   |
| 2032 | TRUE | Empty | TSP1-ubiquitinosome complex subunit 1 OS-Mus musculus GN-Tsp1 PE-4 SV-1                                                           | tr G1UXV.59.kda   | 95% (0.0) | unknown   | 4       | 0 |   |
| 2033 | TRUE | Empty | NGF-A-binding protein 1 OS-Mus musculus GN-Nab1 PE-1 SV-2                                                                         | sp Q9112254.kda   | 95% (0.0) | unknown   | 0       | 2 |   |
| 2034 | TRUE | Empty | NADH dehydrogenase [ubiquinone] 1 beta subcomplex subunit 4 OS-Mus musculus GN-Ndub4 PE-1 SV-3                                    | sp Q9CCJ.15.kda   | 95% (0.0) | unknown   | 2       | 0 |   |
| 2035 | TRUE | Empty | Acylglucosylase, mitochondrial OS-Mus musculus GN-Aglk PE-1 SV-1                                                                  | sp Q9ESW.47.kda   | 95% (0.0) | unknown   | 2       | 0 |   |
| 2036 | TRUE | Empty | Thyroid-stimulating activator of morphogenesis 2 OS-Mus musculus GN-Tham2 PE-2 SV-4                                               | sp Q8D15.128.kda  | 95% (0.0) | unknown   | 2       | 0 |   |
| 2037 | TRUE | Empty | Dual specificity protein kinase CLK3 OS-Mus musculus GN-CLK3 PE-1 SV-2                                                            | sp Q3549274.kda   | 95% (0.0) | unknown   | 0       | 3 |   |
| 2038 | TRUE | Empty | Ubiquitin-protein ligase RING2 OS-Mus musculus GN-Rnf2 PE-1 SV-1                                                                  | sp Q9C4M.10.kda   | 95% (0.0) | unknown   | 0       | 1 |   |
| 2039 | TRUE | Empty | Vigilin OS-Mus musculus GN-Hdlbp PE-1 SV-1                                                                                        | sp Q9BV0.1342.kda | 95% (0.0) | unknown   | 2       | 0 |   |
| 2040 | TRUE | Empty | Ras-responsive element-binding protein 1 OS-Mus musculus GN-Crbp1 PE-2 SV-1                                                       | sp Q9D1215.kda    | 95% (0.0) | unknown   | 0       | 2 |   |
| 2041 | TRUE | Empty | Cyclin-dependent kinase 11B OS-Mus musculus GN-Cdk11b PE-1 SV-2                                                                   | sp P24788.92.kda  | 95% (0.0) | unknown   | 0       | 2 |   |
| 2042 | TRUE | Empty | Pre-mRNA-splicing factor 151 homolog OS-Mus musculus GN-Hsp1 PE-1 SV-2                                                            | sp Q9622933.kda   | 95% (0.0) | unknown   | 0       | 2 |   |
| 2043 | TRUE | Empty | General transcription factor 3C polypeptide 4 OS-Mus musculus GN-Gtf3c PE-1 SV-2                                                  | sp Q8BM9.92.kda   | 95% (0.0) | unknown   | 0       | 1 |   |
| 2044 | TRUE | Empty | Terminal uridylyltransferase 1 OS-Mus musculus GN-Tetzpe1 PE-1 SV-1                                                               | sp Q8U8A.169.kda  | 95% (0.0) | unknown   | 0       | 2 |   |
| 2045 | TRUE | Empty | Aperitaxin and PINK-like factor OS-Mus musculus GN-Apflf PE-2 SV-2                                                                | sp Q9D8A.105.kda  | 95% (0.0) | unknown   | 0       | 2 |   |
| 2046 | TRUE | Empty | CluP-associated protein 1 OS-Mus musculus GN-Clasp1 PE-2 SV-1                                                                     | tr J3Q8P1.161.kda | 95% (0.0) | unknown   | 0       | 3 |   |
| 2047 | TRUE | Empty | Cullin-4A OS-Mus musculus GN-Cula4 PE-1 SV-1                                                                                      | sp Q912H.88.kda   | 95% (0.0) | unknown   | 1       | 0 |   |
| 2048 | TRUE | Empty | Ablasin-1 RNA ligase, cytoplasmic OS-Mus musculus GN-Abs1 PE-1 SV-1                                                               | sp Q9B62.107.kda  | 95% (0.0) | unknown   | 4       | 0 |   |
| 2049 | TRUE | Empty | SWI/SNF-related matrix-associated actin-dependent regulator of chromatin subfamily D member 2 OS-Mus musculus GN-Smarc2 PE-2 SV-2 | sp Q9J9R.59.kda   | TRUE      | 95% (0.0) | unknown | 0 | 3 |
| 2050 | TRUE | Empty | SWI/SNF complex subunit SMARCC1 OS-Mus musculus GN-Smarc1 PE-1 SV-2                                                               | sp P97496.123.kda | TRUE      | 95% (0.0) | unknown | 0 | 3 |
| 2051 | TRUE | Empty | Transcription elongation factor, mitochondrial OS-Mus musculus GN-Tefm PE-2 SV-1                                                  | sp Q95584.42.kda  | TRUE      | 95% (0.0) | unknown | 4 | 0 |
| 2052 | TRUE | Empty | DNA-directed RNA polymerase 1 subunit RPO1 OS-Mus musculus GN-Rpo1 PE-2 SV-1                                                      | tr P6B85.46.kda   | TRUE      | 95% (0.0) | unknown | 2 | 0 |
| 2053 | TRUE | Empty | Protein Gm455 (Fragment) OS-Mus musculus GN-Gm455 PE-4 SV-1                                                                       | tr F6C531.123.kda | 95% (0.0) | unknown   | 0       | 2 |   |
| 2054 | TRUE | Empty | Centrosomal protein of 57 kDa OS-Mus musculus GN-Cep57 PE-1 SV-2                                                                  | sp Q9CE107.kda    | TRUE      | 95% (0.0) | unknown | 3 | 0 |
| 2055 | TRUE | Empty | Tekin (2007) (Fragment) OS-Mus musculus GN-Gm5173 PE-1 SV-1                                                                       | tr F8TWV.64.kda   | TRUE      | 95% (0.0) | unknown | 4 | 1 |
| 2056 | TRUE | Empty | E3 ubiquitin-protein ligase UHRF1 OS-Mus musculus GN-Uhrf1 PE-1 SV-2                                                              | sp Q9VDF.288.kda  | 95% (0.0) | unknown   | 0       | 1 |   |
| 2057 | TRUE | Empty | Alcohol dehydrogenase class-3 OS-Mus musculus GN-Adh3 PE-1 SV-3                                                                   | sp P28474.49.kda  | 95% (0.0) | unknown   | 3       | 0 |   |
| 2058 | TRUE | Empty | Mast cell carboxypeptidase A OS-Mus musculus GN-Cpa3 PE-2 SV-1                                                                    | sp P15089.49.kda  | 95% (0.0) | unknown   | 3       | 0 |   |
| 2059 | TRUE | Empty | Protein arginine N-methyltransferase 1 OS-Mus musculus GN-Nmt1 PE-1 SV-1                                                          | sp Q9J9F.42.kda   | TRUE      | 95% (0.0) | unknown | 4 | 1 |
| 2060 | TRUE | Empty | Protein Ankrd35 (Fragment) OS-Mus musculus GN-Ankr35 PE-2 SV-2                                                                    | tr Q9N0E.145.kda  | TRUE      | 95% (0.0) | unknown | 2 | 0 |
| 2061 | TRUE | Empty | 1-phosphatidylinositol 4,5-bisphosphate phospholipase beta 1 OS-Mus musculus GN-Plcb1 PE-1 SV-2                                   | sp Q9Z18138.kda   | 95% (0.0) | unknown   | 0       | 2 |   |
| 2062 | TRUE | Empty | UMP-CMP kinase OS-Mus musculus GN-Cmpk1 PE-1 SV-1                                                                                 | sp Q9D9P.22.kda   | 95% (0.0) | unknown   | 1       | 0 |   |
| 2063 | TRUE | Empty | Ras-responsive element-binding protein 1 OS-Mus musculus GN-Rheb1 PE-1 SV-2                                                       | sp Q9J3U.184.kda  | 95% (0.0) | unknown   | 0       | 1 |   |
| 2064 | TRUE | Empty | Pyridoxal-dependent decarboxylase domain-containing protein 1 OS-Mus musculus GN-Pdxcd1 PE-1 SV-2                                 | sp Q99K187.kda    | TRUE      | 95% (0.0) | unknown | 2 | 0 |
| 2065 | TRUE | Empty | Uncharacterized protein OS-Mus musculus GN-Tubb4-ps1 PE-2 SV-1                                                                    | tr J3QNR5.50.kda  | TRUE      | 95% (0.0) | unknown | 0 | 3 |
| 2066 | TRUE | Empty | Ubiquitin carboxyl-terminal hydrolase 42 OS-Mus musculus GN-Usp42 PE-2 SV-1                                                       | tr B2RQC.2146.kda | 95% (0.0) | unknown   | 0       | 3 |   |
| 2067 | TRUE | Empty | Protein March 10 OS-Mus musculus GN-March10 PE-1 SV-1                                                                             | tr E9P9T.98.kda   | TRUE      | 95% (0.0) | unknown | 3 | 0 |
| 2068 | TRUE | Empty | 80 kDa M                                                                                                                          |                   |           |           |         |   |   |

|      |      |       |                                                                                                                    |                    |           |           |         |   |   |
|------|------|-------|--------------------------------------------------------------------------------------------------------------------|--------------------|-----------|-----------|---------|---|---|
| 2103 | TRUE | Empty | Probable ribosome biogenesis protein RLP24 OS=Mus musculus GN=Ru24d1 PE=2 SV=1                                     | sp Q99L28.20 kDa   | 95% (2.0) | unknown   | 2       | 1 |   |
| 2104 | TRUE | Empty | Actin-related protein 2/3 complex subunit 5-like protein OS=Mus musculus GN=Arpc5l PE=1 SV=1                       | sp Q50R81.7 kDa    | 95% (2.0) | unknown   | 2       | 1 |   |
| 2105 | TRUE | Empty | Protein 170kDa1 OS=Mus musculus GN=170001M028a PE=4 SV=1                                                           | tr E14AK5.10 kDa   | 0% (1.0)  | unknown   | 1       | 1 |   |
| 2106 | TRUE | Empty | MG15151 OS=Mus musculus GN=Gm6812 PE=4 SV=1                                                                        | tr B1AXU1.13 kDa   | 95% (0.5) | unknown   | 1       | 2 |   |
| 2107 | TRUE | Empty | Intraflagellar transport protein 43 homolog OS=Mus musculus GN=Ifi43 PE=2 SV=2                                     | sp Q50A62.4 kDa    | 0% (1.0)  | unknown   | 1       | 1 |   |
| 2108 | TRUE | Empty | MG131172, isoform CRA_a OS=Mus musculus GN=2G03J80NBZ8n PE=2 SV=1                                                  | sp Q80V75.34 kDa   | 95% (0.0) | unknown   | 2       | 0 |   |
| 2109 | TRUE | Empty | Nucleoporin GLE1 OS=Mus musculus GN=Cle1 PE=2 SV=2                                                                 | sp Q8R32.280 kDa   | 2         | 95% (0.0) | unknown | 0 |   |
| 2110 | TRUE | Empty | Autoantigen with coiled-coil domains and ankyrin repeats OS=Mus musculus GN=LncA PE=1 SV=2                         | sp Q8GRC1.161 kDa  | 95% (0.0) | unknown   | 0       | 1 |   |
| 2111 | TRUE | Empty | Tryptophylpeptidase 1 OS=Mus musculus GN=Tryp1 PE=1 SV=2                                                           | sp Q8R02.261 kDa   | 95% (INF) | unknown   | 2       | 0 |   |
| 2112 | TRUE | Empty | Protein Tbc39a OS=Mus musculus GN=Tbc39 PE=1 SV=1                                                                  | sp Q8Y77.70 kDa    | 95% (0.0) | unknown   | 1       | 1 |   |
| 2113 | TRUE | Empty | Protein 44304021189k OS=Mus musculus GN=44304021189k PE=2 SV=1                                                     | tr FJGU42.46 kDa   | 95% (INF) | unknown   | 1       | 0 |   |
| 2114 | TRUE | Empty | Cyclin-dependent kinase 7 OS=Mus musculus GN=Cdk7 PE=1 SV=2                                                        | sp Q03147.147 kDa  | 95% (0.0) | unknown   | 0       | 1 |   |
| 2115 | TRUE | Empty | COP9 signalosome complex subunit 2 OS=Mus musculus GN=Cop9.2 PE=1 SV=1                                             | sp P61202.52 kDa   | 95% (INF) | unknown   | 1       | 0 |   |
| 2116 | TRUE | Empty | Coatomer subunit beta' OS=Mus musculus GN=Copbeta' PE=2 SV=2                                                       | sp Q55029.122 kDa  | 95% (INF) | unknown   | 1       | 0 |   |
| 2117 | TRUE | Empty | Cystatin-9 OS=Mus musculus GN=Ct9 PE=2 SV=1                                                                        | sp Q50H216.16 kDa  | 95% (INF) | unknown   | 2       | 0 |   |
| 2118 | TRUE | Empty | U3 small nucleolar RNA-associated protein 6 homolog OS=Mus musculus GN=Utp6 PE=2 SV=1                              | sp Q8VUC6.70 kDa   | 95% (0.0) | unknown   | 0       | 1 |   |
| 2119 | TRUE | Empty | Serine/threonine-protein phosphatase PP1-alpha catalytic subunit OS=Mus musculus GN=Ppp3c1a PE=1 SV=1              | sp P62137.38 kDa   | TRUE      | 95% (0.0) | unknown | 0 | 1 |
| 2120 | TRUE | Empty | Protein phosphatase 1 OS=Mus musculus GN=Ppp3c2 PE=2 SV=3                                                          | sp Q50H04.52 kDa   | 95% (INF) | unknown   | 2       | 0 |   |
| 2121 | TRUE | Empty | ARF GTPase-activating protein G1T1 OS=Mus musculus GN=G1T1 PE=2 SV=1                                               | sp P25258.84 kDa   | 95% (INF) | unknown   | 2       | 0 |   |
| 2122 | TRUE | Empty | Guanine nucleotide-binding protein(GI)(G1S)(GI0) subunit gamma-12 OS=Mus musculus GN=Gng12 PE=1 SV=3               | sp Q50A58.58 kDa   | 95% (INF) | unknown   | 2       | 0 |   |
| 2123 | TRUE | Empty | Proteasome-associated protein E209 homolog OS=Mus musculus GN=Ecm29 PE=1 SV=3                                      | sp Q50P05.204 kDa  | 95% (INF) | unknown   | 2       | 0 |   |
| 2124 | TRUE | Empty | DNA-directed RNA polymerase II subunit RP07 OS=Mus musculus G2 SV=1                                                | sp P42485.19 kDa   | 95% (0.0) | unknown   | 0       | 2 |   |
| 2125 | TRUE | Empty | Alpha-soluble NSF attachment protein OS=Mus musculus GN=NSA PE=1 SV=1                                              | sp Q50R00.33 kDa   | 95% (INF) | unknown   | 3       | 0 |   |
| 2126 | TRUE | Empty | Deoxyuridine triphosphatase, isoform CRA_b OS=Mus musculus GN=Dut PE=2 SV=1                                        | tr Q8VQC1.121 kDa  | 95% (INF) | unknown   | 3       | 0 |   |
| 2127 | TRUE | Empty | MG15480 OS=Mus musculus GN=IP6B PE=2 SV=1                                                                          | tr B2RW91.76 kDa   | 95% (0.0) | unknown   | 0       | 1 |   |
| 2128 | TRUE | Empty | TRAF-type zinc finger domain-containing protein 1 OS=Mus musculus GN=Trafd1 PE=1 SV=1                              | sp Q50YU3.164 kDa  | 95% (INF) | unknown   | 1       | 0 |   |
| 2129 | TRUE | Empty | Membrane-associated phosphatidylinositol transfer protein 2 OS=Mus musculus GN=Pltm2n PE=1 SV=2                    | sp Q8ZPC1.148 kDa  | 95% (0.0) | unknown   | 0       | 1 |   |
| 2130 | TRUE | Empty | DOB1 and CUL4-associated factor 13 OS=Mus musculus GN=Dcaf13 PE=2 SV=2                                             | sp Q6PAC3.151 kDa  | 95% (INF) | unknown   | 2       | 0 |   |
| 2131 | TRUE | Empty | Ubiquitin-conjugating enzyme E2 variant 1 OS=Mus musculus GN=Ube2v1 PE=1 SV=1                                      | sp Q2CVC2.116 kDa  | 95% (INF) | unknown   | 2       | 0 |   |
| 2132 | TRUE | Empty | RNA12 heavy chain OS=Mus musculus GN=Hn1 PE=1 SV=2                                                                 | sp P95S2.21 kDa    | 95% (0.0) | unknown   | 0       | 2 |   |
| 2133 | TRUE | Empty | Hepatitis-derived growth factor OS=Mus musculus GN=Hdgf PE=1 SV=2                                                  | sp P15859.26 kDa   | TRUE      | 95% (0.0) | unknown | 0 | 2 |
| 2134 | TRUE | Empty | U4U6 small nuclear ribonucleoprotein Prp4 OS=Mus musculus GN=Prp4 PE=2 SV=1                                        | sp Q50A05.58 kDa   | 95% (0.0) | unknown   | 0       | 1 |   |
| 2135 | TRUE | Empty | Protein domain sheath WW domain-binding protein OS=Mus musculus GN=Wh2n PE=2 SV=1                                  | sp Q50G05.237 kDa  | 95% (0.0) | unknown   | 0       | 2 |   |
| 2136 | TRUE | Empty | Cullin-5 OS=Mus musculus GN=Cul5 PE=1 SV=3                                                                         | sp Q80VY9.193 kDa  | 95% (0.0) | unknown   | 0       | 2 |   |
| 2137 | TRUE | Empty | WD repeat-containing protein 43 OS=Mus musculus GN=Wdr43 PE=1 SV=2                                                 | sp Q6QUL4.75 kDa   | 95% (0.0) | unknown   | 0       | 2 |   |
| 2138 | TRUE | Empty | Centromere protein of 41 kDa OS=Mus musculus GN=Cap41 PE=2 SV=1                                                    | tr H9KUZ6.33 kDa   | 95% (0.0) | unknown   | 0       | 2 |   |
| 2139 | TRUE | Empty | Host cell factor 2 OS=Mus musculus GN=Hccf2 PE=1 SV=1                                                              | tr Q55837.79 kDa   | 95% (0.0) | unknown   | 0       | 2 |   |
| 2140 | TRUE | Empty | CCK2A-interacting protein OS=Mus musculus GN=Cck2aip PE=2 SV=1                                                     | sp Q88B77.60 kDa   | 95% (INF) | unknown   | 1       | 0 |   |
| 2141 | TRUE | Empty | Putative helicase MOV-10 OS=Mus musculus GN=Mov10 PE=1 SV=2                                                        | sp P22429.114 kDa  | 95% (0.0) | unknown   | 0       | 1 |   |
| 2142 | TRUE | Empty | UPF0691 protein Cborf116 homolog OS=Mus musculus PE=2 SV=1                                                         | sp Q58M19.19 kDa   | 95% (0.0) | unknown   | 0       | 2 |   |
| 2143 | TRUE | Empty | Protein kinase OS=Mus musculus GN=DnaK1 PE=1 SV=2                                                                  | sp Q89R1.88 kDa    | 95% (0.0) | unknown   | 0       | 2 |   |
| 2144 | TRUE | Empty | Protein Upl2 OS=Mus musculus GN=Upl2 PE=2 SV=1                                                                     | tr JA2AT7.148 kDa  | TRUE      | 95% (0.0) | unknown | 0 | 2 |
| 2145 | TRUE | Empty | Protein Nfat1 OS=Mus musculus GN=Nfat1 PE=2 SV=1                                                                   | tr E9Q871.102 kDa  | 95% (INF) | unknown   | 1       | 0 |   |
| 2146 | TRUE | Empty | REST corepressor 1 OS=Mus musculus GN=Rcpr1 PE=4 SV=1                                                              | tr K3W49.53 kDa    | 95% (0.0) | unknown   | 0       | 2 |   |
| 2147 | TRUE | Empty | Coiled-coil domain-containing protein 150 OS=Mus musculus GN=Ccdc150 PE=2 SV=2                                     | sp Q8C0D1.123 kDa  | 95% (0.0) | unknown   | 0       | 1 |   |
| 2148 | TRUE | Empty | AT-rich interactive domain-containing protein 3A OS=Mus musculus GN=Arif3a PE=1 SV=1                               | sp Q52413.164 kDa  | 95% (0.0) | unknown   | 0       | 2 |   |
| 2149 | TRUE | Empty | WD repeat-containing protein 82 OS=Mus musculus GN=Wdr82 PE=1 SV=1                                                 | sp Q88FQ3.35 kDa   | 95% (INF) | unknown   | 2       | 0 |   |
| 2150 | TRUE | Empty | Mitochondrial import inner membrane translocase subunit TIM44 OS=Mus musculus GN=Timm44 PE=2 SV=2                  | sp Q55875.51 kDa   | 95% (INF) | unknown   | 1       | 0 |   |
| 2151 | TRUE | Empty | Sortilin-1 OS=Mus musculus GN=Sort1 PE=1 SV=2                                                                      | sp Q231Y1.40 kDa   | 95% (0.0) | unknown   | 0       | 1 |   |
| 2152 | TRUE | Empty | Sortilin-3 OS=Mus musculus GN=Sort3 PE=2 SV=1                                                                      | sp Q4VAA.65 kDa    | 95% (0.0) | unknown   | 0       | 2 |   |
| 2153 | TRUE | Empty | Protein FAM208A OS=Mus musculus GN=Fam208a PE=2 SV=2                                                               | sp Q69Z9.181 kDa   | 95% (0.0) | unknown   | 0       | 1 |   |
| 2154 | TRUE | Empty | Polyovin receptor-related protein 2 OS=Mus musculus GN=Pvr2 PE=1 SV=2                                              | sp P2507.57 kDa    | 95% (0.0) | unknown   | 0       | 1 |   |
| 2155 | TRUE | Empty | Protein PRK2A OS=Mus musculus GN=Prk2a PE=2 SV=1                                                                   | sp Q5UAX.215 kDa   | 95% (0.0) | unknown   | 0       | 1 |   |
| 2156 | TRUE | Empty | Leucine zipper putative tumor suppressor 2 OS=Mus musculus GN=Lzt2 PE=2 SV=2                                       | sp Q91Y1.673 kDa   | 95% (0.0) | unknown   | 0       | 4 |   |
| 2157 | TRUE | Empty | Glutamate receptor-interacting protein 2 OS=Mus musculus GN=Grip1 PE=1 SV=1                                        | sp Q29T5.122 kDa   | TRUE      | 95% (INF) | unknown | 3 | 0 |
| 2158 | TRUE | Empty | Protein G12394 OS=Mus musculus GN=G12394 PE=1 SV=1                                                                 | tr JA3AP.6.100 kDa | TRUE      | 95% (0.0) | unknown | 0 | 1 |
| 2159 | TRUE | Empty | DNA replication licensing factor MCM3 OS=Mus musculus GN=Mcm3 PE=1 SV=2                                            | sp P22026.92 kDa   | 95% (INF) | unknown   | 2       | 0 |   |
| 2160 | TRUE | Empty | Rab-like protein 5 OS=Mus musculus GN=Rab5 PE=2 SV=1                                                               | sp Q80A2.21 kDa    | 95% (INF) | unknown   | 4       | 0 |   |
| 2161 | TRUE | Empty | MG15474 OS=Mus musculus GN=170001K199k PE=2 SV=1                                                                   | tr Q80T71.25 kDa   | TRUE      | 95% (INF) | unknown | 3 | 0 |
| 2162 | TRUE | Empty | Plectin OS=Mus musculus GN=Plect1 PE=2 SV=1                                                                        | sp Q8R0R4.42 kDa   | TRUE      | 95% (0.0) | unknown | 0 | 2 |
| 2163 | TRUE | Empty | Protein Rasaf2 OS=Mus musculus GN=Rasaf2 PE=2 SV=1                                                                 | sp Q71Y55.142 kDa  | 95% (0.0) | unknown   | 0       | 2 |   |
| 2164 | TRUE | Empty | Mitochondrial purine biosynthesis protein PURH OS=Mus musculus GN=Peic PE=1 SV=2                                   | sp Q9CW8.64 kDa    | 95% (INF) | unknown   | 3       | 0 |   |
| 2165 | TRUE | Empty | Coiled-coil helix-coiled-coil helix domain-containing protein 6, mitochondrial OS=Mus musculus GN=Cchhd6 PE=2 SV=1 | tr E5C4M.26 kDa    | TRUE      | 95% (INF) | unknown | 4 | 0 |
| 2166 | TRUE | Empty | Heat shock protein 70 kDa, mitochondrial OS=Mus musculus GN=Hsp70 PE=1 SV=1                                        | sp Q3716.40 kDa    | TRUE      | 95% (0.0) | unknown | 2 | 0 |
| 2167 | TRUE | Empty | Heat shock protein 75 kDa, mitochondrial OS=Mus musculus GN=Hsp71 PE=1 SV=1                                        | sp Q50C0N.80 kDa   | TRUE      | 95% (INF) | unknown | 2 | 0 |
| 2168 | TRUE | Empty | Neurabin 1 OS=Mus musculus GN=Ppp1n PE=2 SV=1                                                                      | tr Q77N74.123 kDa  | TRUE      | 95% (0.0) | unknown | 0 | 2 |
| 2169 | TRUE | Empty | Conserved oligomeric Golgi complex subunit 6 OS=Mus musculus GN=Cog6 PE=2 SV=2                                     | sp Q8R83.73 kDa    | 95% (INF) | unknown   | 3       | 0 |   |
| 2170 | TRUE | Empty | Protein 170kDa1 OS=Mus musculus GN=170001M028a PE=1 SV=1                                                           | sp Q89R01.123 kDa  | TRUE      | 95% (0.0) | unknown | 1 | 0 |
| 2171 | TRUE | Empty | DNA mismatch repair protein Msh6 OS=Mus musculus GN=Msh6 PE=1 SV=3                                                 | sp P42716.151 kDa  | 95% (INF) | unknown   | 1       | 0 |   |
| 2172 | TRUE | Empty | Isochorate dehydrogenase (NADP), mitochondrial OS=Mus musculus GN=Ihd2 PE=1 SV=3                                   | sp P54071.51 kDa   | 95% (INF) | unknown   | 1       | 0 |   |
| 2173 | TRUE | Empty | Cysteine-rich pericardial helix 4 OS=Mus musculus GN=Cycph4 PE=2 SV=1                                              | tr Q8Q92.18 kDa    | 95% (0.0) | unknown   | 0       | 3 |   |
| 2174 | TRUE | Empty | 3-hydroxyacyl-CoA thiolase, mitochondrial OS=Mus musculus GN=Hcaa2 PE=1 SV=3                                       | sp Q89B7.42 kDa    | 95% (0.0) | unknown   | 0       | 3 |   |
| 2175 | TRUE | Empty | Host cell factor 1 OS=Mus musculus GN=Hccf1 PE=1 SV=2                                                              | sp Q5119.121 kDa   | TRUE      | 95% (INF) | unknown | 1 | 0 |
| 2176 | TRUE | Empty | Testis-expressed sequence 40 protein OS=Mus musculus GN=Tex40 PE=2 SV=1                                            | sp Q50C29.233 kDa  | 95% (0.0) | unknown   | 0       | 1 |   |
| 2177 | TRUE | Empty | Transcriptional repressor CTCF OS=Mus musculus GN=Ctcf PE=1 SV=2                                                   | sp Q51184.84 kDa   | 95% (0.0) | unknown   | 0       | 1 |   |
| 2178 | TRUE | Empty | Anexin (Fragment) OS=Mus musculus GN=Anxa2 PE=1 SV=1                                                               | sp E9D2N7.22 kDa   | TRUE      | 95% (0.0) | unknown | 0 | 1 |
| 2179 | TRUE | Empty | Kinesin-like protein KIF17 OS=Mus musculus GN=Kif17 PE=1 SV=1                                                      | sp Q9P9P7.116 kDa  | 95% (INF) | unknown   | 2       | 0 |   |
| 2180 | TRUE | Empty | Basic leucine zipper and W2 domain-containing protein 1 OS=Mus musculus GN=Bwl1 PE=1 SV=1                          | sp Q5C0C.48 kDa    | 95% (INF) | unknown   | 1       | 0 |   |
| 2181 | TRUE | Empty | Rap-related protein Rap-1A OS=Mus musculus GN=Rap1a PE=2 SV=1                                                      | sp P25283.21 kDa   | TRUE      | 95% (0.0) | unknown | 0 | 2 |
| 2182 | TRUE | Empty | Cytoplasmic polyadenylation element-binding protein 1 OS=Mus musculus GN=Cpeb1 PE=2 SV=1                           | tr E2258.76 kDa    | TRUE      | 95% (0.0) | unknown | 0 | 1 |
| 2183 | TRUE | Empty | Threonine synthase-like 1 OS=Mus musculus GN=Thsnl1 PE=2 SV=1                                                      | sp Q89B5.583 kDa   | TRUE      | 95% (INF) | unknown | 3 | 0 |
| 2184 | TRUE | Empty | GTPase Kra5 OS=Mus musculus GN=Kra5 PE=1 SV=1                                                                      | sp P22888.22 kDa   | TRUE      | 95% (INF) | unknown | 1 | 0 |
| 2185 | TRUE | Empty | Inhibitor-like protein OS=Mus musculus GN=Lc4a1 PE=2 SV=1                                                          | tr D19K6.815 kDa   | 95% (0.0) | unknown   | 1       | 1 |   |
| 2186 | TRUE | Empty | Protein Gm1739 OS=Mus musculus GN=Gm1739 PE=4 SV=1                                                                 | tr L2N796.26 kDa   | TRUE      | 95% (0.0) | unknown | 0 | 1 |
| 2187 | TRUE | Empty | Magnesium transporter protein 1 OS=Mus musculus GN=Magt1 PE=2 SV=1                                                 | sp Q5CQY1.38 kDa   | TRUE      | 95% (INF) | unknown | 2 | 0 |
| 2188 | TRUE | Empty | Intron-binding protein aquarius OS=Mus musculus GN=Aqr PE=2 SV=2                                                   | sp Q8CFC1.2170 kDa | 95% (0.0) | unknown   | 0       | 2 |   |
| 2189 | TRUE | Empty | Collagen alpha-1(VI) chain OS=Mus musculus GN=Cola1 PE=2 SV=1                                                      | sp Q50A87.108 kDa  | 95% (0.0) | unknown   | 0       | 2 |   |
| 2190 | TRUE | Empty | Haplokin-specific alanine-rich acidic protein OS=Mus musculus GN=Hga8 PE=2 SV=2                                    | sp Q5UJL1.123 kDa  | 95% (0.0) | unknown   | 0       | 2 |   |
| 2191 | TRUE | Empty | Enoyl-CoA delta isomerase 1, mitochondrial OS=Mus musculus GN=Eci1 PE=2 SV=2                                       | sp P42125.32 kDa   | 95% (INF) | unknown   | 1       | 0 |   |
| 2192 | TRUE | Empty | L-2-hydroxyglutarate dehydrogenase, mitochondrial OS=Mus musculus GN=L2hgdh PE=2 SV=1                              | sp Q91Y05.1 kDa    | 95% (INF) | unknown   | 1       | 0 |   |
| 2193 | TRUE | Empty | Actin-binding transporter protein 1 (Fragment) OS=Mus musculus GN=Actb1 PE=4 SV=1                                  | sp P87V1.135 kDa   | TRUE      | 95% (0.0) | unknown | 0 | 3 |
| 2194 | TRUE | Empty | Periplakin 1, isoform CRA_a OS=Mus musculus GN=Ppnl1 PE=4 SV=1                                                     | tr K3X59.44 kDa    | TRUE      | 95% (0.0) | unknown | 0 | 3 |
| 2195 | TRUE | Empty | RNA-binding protein 48 OS=Mus musculus GN=Rbm48 PE=1 SV=1                                                          | sp Q89V20.40 kDa   | 0% (0.8)  | unknown   | 1       | 2 |   |
| 2196 | TRUE | Empty | MG14086 OS=Mus musculus GN=49215310121k PE=4 SV=1                                                                  | tr G3I03.138 kDa   | 95% (0.5) | unknown   | 1       | 2 |   |
| 2197 | TRUE | Empty | Rita domain-containing protein 1 OS=Mus musculus GN=Rita1 PE=2 SV=1                                                | sp Q3XWV1.11 kDa   | 95% (0.0) | unknown   | 0       | 1 |   |
| 2198 | TRUE | Empty | 39S ribosomal protein L49, mitochondrial OS=Mus musculus GN=Mpl49 PE=2 SV=1                                        | sp Q5C0A.19 kDa    | 95% (2.0) | unknown   | 2       | 1 |   |
| 2199 | TRUE | Empty | Suppressor of G2 allele of SKP1 homolog OS=Mus musculus GN=Sugt1 PE=2 SV=3                                         | sp Q5C3A.38 kDa    | 0% (1.0)  | unknown   | 1       | 1 |   |
| 2200 | TRUE | Empty | MG1618, isoform CRA_c OS=Mus musculus GN=Ncme4a PE=1 SV=1                                                          | tr G1A30.44 kDa    | 0% (1.0)  | unknown   | 1       | 1 |   |
| 2201 | TRUE | Empty | Initiation factor eukaryotic 1 OS=Mus musculus GN=EIF1 PE=1 SV=2                                                   | sp P3560.125 kDa   | 0% (1.0)  | unknown   | 0       | 1 |   |
| 2202 | TRUE | Empty | ATPase family AAA domain-containing protein 1 OS=Mus musculus GN=Atad1 PE=1 SV=1                                   | sp Q505T.41 kDa    | 95% (0.0) | unknown   | 0       | 1 |   |
| 2203 | TRUE | Empty | Calumenin OS=Mus musculus GN=Calu PE=1 SV=1                                                                        | sp Q53887.37 kDa   | 95% (0.5) | unknown   | 1       | 2 |   |
| 2204 | TRUE | Empty | UPF0704 protein Cborf166 homolog OS=Mus musculus PE=2 SV=2                                                         | sp Q8P6F.77 kDa    | 95% (0.5) | unknown   | 1       | 2 |   |
| 2205 | TRUE | Empty | Serine protease inhibitor Kazal-type 2 OS=Mus musculus GN=Spk2 PE=1 SV=1                                           | sp Q89M4.103 kDa   | 95% (0.0) | unknown   | 1       | 2 |   |
| 2206 | TRUE | Empty | Serine/threonine-protein kinase VRK2 OS=Mus musculus GN=Vrk2 PE=1 SV=2                                             | sp Q89N2.158 kDa   | 95% (0.5) | unknown   | 1       | 2 |   |
| 2207 | TRUE | Empty | Coiled-coil domain-containing protein 12 OS=Mus musculus GN=Ccd12 PE=1 SV=2                                        | sp Q8R84.419 kDa   | 95% (0.5) | unknown   | 1       | 2 |   |
| 2208 | TRUE | Empty | Protein 170kDa1 OS=Mus musculus GN=170001M028a PE=2 SV=1                                                           | sp Q50C16.105 kDa  | 95% (0.0) | unknown   | 2       | 0 |   |
| 2209 | TRUE | Empty | ATP-dependent DNA helicase Q1 OS=Mus musculus GN=Recql PE=2 SV=2                                                   | sp Q92129.72 kDa   | 95% (0.5) | unknown   | 1       | 2 |   |
| 2210 | TRUE | Empty | MG7669, isoform CRA_b OS=Mus musculus GN=Sup4a PE=4 SV=1                                                           | tr D6RHM7.11 kDa   | 0% (1.0)  | unknown   | 1       | 1 |   |
| 2211 | TRUE | Empty | Protein Ube4a OS=Mus musculus GN=Ube4a PE=2 SV=1                                                                   | tr E9Z76.118 kDa   | 95% (2.0) | unknown   | 2       | 1 |   |
| 2212 | TRUE | Empty | Protein Tafa1 (Fragment) OS=Mus musculus GN=Tafa1 PE=4 SV=1                                                        | tr F69W9.73 kDa    | 0% (1.0)  | unknown   | 1       | 1 |   |
| 2213 | TRUE | Empty | Phosphoglycerate mutase 1 OS=Mus musculus GN=Pgam1 PE=1 SV=3                                                       | tr Q50M81.29 kDa   | 95% (2.0) | unknown   | 2       | 1 |   |
| 2214 | TRUE | Empty | Keratin, type II cytoskeletal 1b OS=Mus musculus GN=Krt7 PE=1 SV=1                                                 | sp Q6F76.61 kDa    | TRUE      | 95% (0.0) | unknown | 0 | 1 |
| 2215 | TRUE | Empty | tRNA methyltransferase 112 homolog OS=Mus musculus GN=Tm112 PE=2 SV=1                                              | sp Q9DC0.314 kDa   | 95% (0.0) | unknown   | 0       | 1 |   |
| 2216 | TRUE | Empty | DNA polymerase epsilon subunit 3 OS=Mus musculus GN=Pole3 PE=2 SV=1                                                | sp Q83K7.17 kDa    | 95% (0.0) | unknown   | 0       | 2 |   |
| 2217 | TRUE | Empty | Calcium-binding and spermidin-specific protein 1 OS=Mus musculus GN=Cals1 PE=1 SV=1                                | sp Q8C6J.1342 kDa  | 95% (0.0) | unknown   | 0       | 2 |   |
| 2218 | TRUE | Empty | UPF0686 protein C11orf11 homolog OS=Mus musculus PE=2 SV=1                                                         | sp Q9D131.20 kDa   | 95% (0.0) | unknown   | 0       | 1 |   |
| 2219 | TRUE | Empty | Ras-related protein Rab-10 OS=Mus musculus GN=Rab10 PE=1 SV=1                                                      | sp P61027.23 kDa   | TRUE      | 95% (0.0) | unknown | 0 | 2 |
| 2220 | TRUE | Empty | Synaptotagmin-like protein 1 OS=Mus musculus GN=Sytl1 PE=1 SV=1                                                    | sp Q89R0.76 kDa    | 95% (INF) | unknown   | 2       | 0 |   |
| 2221 |      |       |                                                                                                                    |                    |           |           |         |   |   |

|      |      |       |                                                                                                                          |                   |      |          |         |   |   |
|------|------|-------|--------------------------------------------------------------------------------------------------------------------------|-------------------|------|----------|---------|---|---|
| 2256 | TRUE | Empty | Amyotrophic lateral sclerosis 2 chromosomal region candidate gene 12 protein homolog OS=Mus musculus GN=Abzr22 PE=2 SV=1 | sp Q8BRW4 5 kDa   |      | 95% (NF) | unknown | 1 | 0 |
| 2257 | TRUE | Empty | ATP-dependent RNA helicase DD13A OS=Mus musculus GN=Dot13a PE=2 SV=2                                                     | sp Q61655 4 kDa   | TRUE | 95% (NF) | unknown | 1 | 0 |
| 2258 | TRUE | Empty | Protein TIP-dependent RNA helicase DD20 OS=Mus musculus GN=Dot20 PE=1 SV=2                                               | sp Q61919 2 kDa   |      | 95% (D)  | unknown | 0 | 2 |
| 2259 | TRUE | Empty | LR2-binding protein OS=Mus musculus GN=Utp2b PE=2 SV=1                                                                   | sp Q6040C 4 kDa   |      | 95% (D)  | unknown | 0 | 2 |
| 2260 | TRUE | Empty | Nipped-B-like protein OS=Mus musculus GN=NippiB PE=1 SV=1                                                                | sp Q6K0C3 5 kDa   |      | 95% (D)  | unknown | 0 | 2 |
| 2261 | TRUE | Empty | Overlapping with actin OS=Mus musculus GN=Oa1 PE=2 SV=1                                                                  | sp Q605780 2 kDa  | TRUE | 95% (D)  | unknown | 0 | 2 |
| 2262 | TRUE | Empty | Protein GMR22 (Fragment) OS=Mus musculus GN=GMR22 PE=4 SV=1                                                              | tr L1UMER82 2 kDa | TRUE | 95% (NF) | unknown | 2 | 0 |
| 2263 | TRUE | Empty | Protein Rbm15 OS=Mus musculus GN=Rbm15 PE=2 SV=1                                                                         | tr Q6VL3 106 kDa  |      | 95% (D)  | unknown | 0 | 2 |
| 2264 | TRUE | Empty | Upstream-binding protein 1 OS=Mus musculus GN=Ubp1 PE=1 SV=1                                                             | sp Q61157 60 kDa  |      | 95% (D)  | unknown | 0 | 2 |
| 2265 | TRUE | Empty | Deleted coil domain-containing protein 96 OS=Mus musculus GN=Cd96 PE=2 SV=1                                              | sp Q6R0Z6 27 kDa  |      | 95% (D)  | unknown | 1 | 1 |
| 2266 | TRUE | Empty | DNA-directed RNA polymerase 1, L, and II subunit RPAIC3 OS=Mus musculus GN=Polr2b PE=2 SV=3                              | sp Q93321 7 kDa   |      | 95% (D)  | unknown | 0 | 2 |
| 2267 | TRUE | Empty | COP9 signalosome complex subunit 5 OS=Mus musculus GN=Cops5 PE=1 SV=3                                                    | sp Q63584 38 kDa  |      | 95% (NF) | unknown | 2 | 0 |
| 2268 | TRUE | Empty | Death-inducible oligomer 1 OS=Mus musculus GN=Diol1 PE=1 SV=4                                                            | sp Q6R9824 7 kDa  |      | 95% (D)  | unknown | 0 | 1 |
| 2269 | TRUE | Empty | E1 SUMO-protein ligase PIAS2 OS=Mus musculus GN=Piap2 PE=1 SV=2                                                          | sp Q6M056 6 kDa   | TRUE | 95% (D)  | unknown | 0 | 1 |
| 2270 | TRUE | Empty | FGFR1 oncogene partner OS=Mus musculus GN=FGFr1op PE=1 SV=1                                                              | sp Q66645 3 kDa   | TRUE | 95% (D)  | unknown | 0 | 3 |
| 2271 | TRUE | Empty | Bromodomain-containing protein 7 OS=Mus musculus GN=Brd7 PE=1 SV=1                                                       | sp Q68665 4 kDa   |      | 95% (D)  | unknown | 0 | 1 |
| 2272 | TRUE | Empty | Protein Tlg OS=Mus musculus GN=Tlg PE=4 SV=1                                                                             | tr B8J651 16 kDa  |      | 95% (NF) | unknown | 2 | 0 |
| 2273 | TRUE | Empty | Cohesin subunit SA-3 OS=Mus musculus GN=Htag3 PE=1 SV=2                                                                  | sp Q70376 14 kDa  |      | 95% (D)  | unknown | 0 | 1 |
| 2274 | TRUE | Empty | Zinc finger protein 622 OS=Mus musculus GN=Zfp622 PE=2 SV=1                                                              | sp Q91V95 3 kDa   |      | 95% (NF) | unknown | 1 | 0 |
| 2275 | TRUE | Empty | AFG3-like protein 1 OS=Mus musculus GN=Alf31 PE=2 SV=1                                                                   | sp Q92DA7 8 kDa   |      | 95% (NF) | unknown | 1 | 0 |
| 2276 | TRUE | Empty | Plasminogen OS=Mus musculus GN=Plg PE=1 SV=1                                                                             | sp P20918 91 kDa  |      | 95% (NF) | unknown | 1 | 0 |
| 2277 | TRUE | Empty | Surfactant locus protein 6 OS=Mus musculus GN=Surf6 PE=2 SV=1                                                            | sp P9279 41 kDa   | TRUE | 95% (D)  | unknown | 0 | 2 |
| 2278 | TRUE | Empty | Ubiquitin-associated protein 2-like OS=Mus musculus GN=Uba2p2 PE=1 SV=1                                                  | sp Q8XQ0 117 kDa  |      | 95% (NF) | unknown | 2 | 0 |
| 2279 | TRUE | Empty | Protein strawberry notch homolog 1 OS=Mus musculus GN=Sbnol1 PE=2 SV=1                                                   | tr B2R8R2 154 kDa | TRUE | 95% (NF) | unknown | 1 | 0 |
| 2280 | TRUE | Empty | Nectin-1 BCRA1 gene 1 protein OS=Mus musculus GN=Hnr1 PE=1 SV=1                                                          | sp P7474 110 kDa  |      | 95% (NF) | unknown | 1 | 0 |
| 2281 | TRUE | Empty | 28S ribosomal protein S22, mitochondrial OS=Mus musculus GN=Mrrp22 PE=2 SV=1                                             | sp Q6QCV4 41 kDa  |      | 95% (D)  | unknown | 1 | 0 |
| 2282 | TRUE | Empty | Serine/threonine-protein kinase MARK2 OS=Mus musculus GN=Mark2 PE=1 SV=3                                                 | sp Q6SS128 6 kDa  | TRUE | 95% (D)  | unknown | 0 | 1 |
| 2283 | TRUE | Empty | Anarasin OS=Mus musculus GN=Ciapi1 PE=1 SV=1                                                                             | sp Q6WTY 33 kDa   |      | 95% (NF) | unknown | 1 | 0 |
| 2284 | TRUE | Empty | MCG1612 OS=Mus musculus GN=493402ZNR08R PE=2 SV=1                                                                        | tr Q6D70 38 kDa   |      | 95% (D)  | unknown | 0 | 1 |
| 2285 | TRUE | Empty | 2-tyrosinyl OS=Mus musculus GN=Scrt2 PE=1 SV=2                                                                           | sp Q6L225 56 kDa  |      | 95% (D)  | unknown | 0 | 1 |
| 2286 | TRUE | Empty | Sister chromatid cohesion protein PDSS homolog 8 OS=Mus musculus GN=Pds8 PE=1 SV=1                                       | sp Q4VAAS 164 kDa |      | 95% (D)  | unknown | 0 | 1 |
| 2287 | TRUE | Empty | Sec1 family domain-containing protein 1 OS=Mus musculus GN=Scfip1 PE=2 SV=1                                              | sp Q6R877 2 kDa   |      | 95% (NF) | unknown | 1 | 0 |
| 2288 | TRUE | Empty | Silencing factor, suppressor of white-apricorn homolog OS=Mus musculus GN=Swpp PE=1 SV=2                                 | sp Q6U50 164 kDa  |      | 95% (D)  | unknown | 0 | 1 |
| 2289 | TRUE | Empty | Cylichin uptake protein 1, mitochondrial OS=Mus musculus GN=Muz4 PE=1 SV=2                                               | sp Q6UC10 40 kDa  |      | 95% (NF) | unknown | 1 | 0 |
| 2290 | TRUE | Empty | Kinesin-like protein KIF18B OS=Mus musculus GN=Kif18b PE=2 SV=2                                                          | sp Q6PF69 2 kDa   |      | 95% (D)  | unknown | 0 | 1 |
| 2291 | TRUE | Empty | Syntaxin-12 OS=Mus musculus GN=Snx12 PE=1 SV=1                                                                           | sp Q6R603 3 kDa   | TRUE | 95% (D)  | unknown | 0 | 1 |
| 2292 | TRUE | Empty | Coilin subunit delta OS=Mus musculus GN=Coiln1 PE=1 SV=2                                                                 | sp Q6CV15 57 kDa  |      | 95% (NF) | unknown | 0 | 1 |
| 2293 | TRUE | Empty | Junction plakoglobin OS=Mus musculus GN=Upj1 PE=1 SV=3                                                                   | sp Q6Z257 2 kDa   | TRUE | 95% (NF) | unknown | 1 | 0 |
| 2294 | TRUE | Empty | LM domain-containing protein 2 OS=Mus musculus GN=Lmd2 PE=2 SV=1                                                         | sp Q6B6E1 4 kDa   |      | 95% (NF) | unknown | 2 | 0 |
| 2295 | TRUE | Empty | Mediator of RNA polymerase II transcription subunit 39 OS=Mus musculus GN=Med19 PE=1 SV=1                                | sp Q6C160 26 kDa  |      | 95% (D)  | unknown | 0 | 1 |
| 2296 | TRUE | Empty | Mast cell protease 4 OS=Mus musculus GN=Mcp4 PE=1 SV=1                                                                   | sp Q3JUN8 27 kDa  |      | 95% (D)  | unknown | 0 | 1 |
| 2297 | TRUE | Empty | Ribonucleoprotein FTB-binding 1 OS=Mus musculus GN=Ravver1 PE=1 SV=2                                                     | sp Q6QCV4 79 kDa  |      | 95% (NF) | unknown | 1 | 0 |
| 2298 | TRUE | Empty | Putative ATP-dependent RNA helicase TDRD9 OS=Mus musculus GN=Tdr9 PE=1 SV=3                                              | sp Q1487 156 kDa  |      | 95% (NF) | unknown | 1 | 0 |
| 2299 | TRUE | Empty | E3 ubiquitin-protein ligase UBRS OS=Mus musculus GN=Ubr5 PE=2 SV=2                                                       | sp Q60779 308 kDa |      | 95% (D)  | unknown | 0 | 1 |
| 2300 | TRUE | Empty | Uridylate-accepting enzyme E2 U3 OS=Mus musculus GN=Uce2 PE=1 SV=1                                                       | sp Q6J075 17 kDa  |      | 95% (D)  | unknown | 0 | 1 |
| 2301 | TRUE | Empty | 3-phosphoinositide-dependent protein kinase 1 OS=Mus musculus GN=Pd4p1 PE=1 SV=2                                         | sp Q6Z2A6 4 kDa   |      | 95% (NF) | unknown | 2 | 0 |
| 2302 | TRUE | Empty | Atherin OS=Mus musculus GN=Samd1 PE=3 SV=1                                                                               | sp Q3VXK 55 kDa   |      | 95% (D)  | unknown | 0 | 1 |
| 2303 | TRUE | Empty | Microtubule-associated protein 2 OS=Mus musculus GN=Mbp2 PE=1 SV=2                                                       | sp P2037 199 kDa  | TRUE | 95% (D)  | unknown | 0 | 2 |
| 2304 | TRUE | Empty | Chromatin complexes subunit BAP18 OS=Mus musculus GN=Bap18 PE=1 SV=1                                                     | sp Q6CQ9 18 kDa   |      | 95% (NF) | unknown | 2 | 0 |
| 2305 | TRUE | Empty | Protein disulfide-isomerase A6 OS=Mus musculus GN=Prda6 PE=1 SV=3                                                        | sp Q6Z2848 6 kDa  |      | 95% (NF) | unknown | 3 | 0 |
| 2306 | TRUE | Empty | Myeloid leukemia factor 1 OS=Mus musculus GN=Mlf1 PE=2 SV=1                                                              | tr Q6Z32 13 kDa   |      | 95% (NF) | unknown | 3 | 0 |
| 2307 | TRUE | Empty | Cyclin-dependent kinase 2-associated protein 1 OS=Mus musculus GN=Cdk2ap1 PE=1 SV=2                                      | sp Q6F50 12 kDa   |      | 95% (D)  | unknown | 0 | 3 |
| 2308 | TRUE | Empty | Cragin OS=Mus musculus GN=Cgn PE=2 SV=1                                                                                  | sp F5C4M 17 kDa   | TRUE | 95% (NF) | unknown | 4 | 0 |
| 2309 | TRUE | Empty | CAP-G domain-containing linker protein 1 (Fragment) OS=Mus musculus GN=Cli1 PE=2 SV=1                                    | tr Q6C05 93 kDa   |      | 95% (D)  | unknown | 0 | 1 |
| 2310 | TRUE | Empty | D-beta-hydroxybutyrate dehydrogenase, mitochondrial OS=Mus musculus GN=Bhd1 PE=1 SV=2                                    | tr Q60X8 38 kDa   |      | 95% (NF) | unknown | 1 | 0 |
| 2311 | TRUE | Empty | Hematopoietic cell transcript 1, isoform OA, OS=Mus musculus GN=Hemc1 PE=4 SV=1                                          | tr Q65R1 720 kDa  | TRUE | 95% (D)  | unknown | 2 | 0 |
| 2312 | TRUE | Empty | MCG4322, isoform CDA, OS=Mus musculus GN=Marcb1 PE=2 SV=1                                                                | sp Q6J971 26 kDa  | TRUE | 95% (D)  | unknown | 0 | 2 |
| 2313 | TRUE | Empty | DNA-directed RNA polymerase II subunit 9B11 OS=Mus musculus GN=Polr2j PE=2 SV=1                                          | sp Q60874 13 kDa  |      | 0% (L)   | unknown | 1 | 1 |
| 2314 | TRUE | Empty | OTU domain-containing protein 6A OS=Mus musculus GN=Otu6a PE=2 SV=1                                                      | sp Q6E21 34 kDa   |      | 0% (L)   | unknown | 1 | 1 |
| 2315 | TRUE | Empty | Mast cell alpha-helical rod protein OS=Mus musculus GN=Chrr1 PE=2 SV=3                                                   | sp Q60C18 87 kDa  |      | 0% (L)   | unknown | 1 | 1 |
| 2316 | TRUE | Empty | Mitochondrial processing peptidase subunit alpha OS=Mus musculus GN=Prmpa PE=1 SV=1                                      | sp Q6DQC 58 kDa   |      | 0% (L)   | unknown | 1 | 1 |
| 2317 | TRUE | Empty | Protein asunder homolog (Fragment) OS=Mus musculus GN=Aun PE=4 SV=1                                                      | tr F7894 26 kDa   |      | 0% (L)   | unknown | 1 | 1 |
| 2318 | TRUE | Empty | DNA-directed RNA polymerase 1 subunit RPA3A OS=Mus musculus GN=Cd3ap PE=1 SV=2                                           | tr Q76K45 43 kDa  |      | 95% (NF) | unknown | 1 | 0 |
| 2319 | TRUE | Empty | 3 OS=Mus musculus GN=Abn3 PE=2 SV=1                                                                                      | sp Q6M853 4 kDa   |      | 95% (D)  | unknown | 0 | 1 |
| 2320 | TRUE | Empty | Nai-1(H)-exchange regulatory cofactor NHE-RF1 OS=Mus musculus GN=Sk9a31 PE=1 SV=3                                        | sp P7044 39 kDa   |      | 95% (D)  | unknown | 0 | 1 |
| 2321 | TRUE | Empty | ADP-ribosylation factor-like protein 1 OS=Mus musculus GN=Arl1 PE=2 SV=1                                                 | sp P6121 20 kDa   |      | 95% (NF) | unknown | 1 | 0 |
| 2322 | TRUE | Empty | Microprocessor complex subunit DGC8 OS=Mus musculus GN=Dgr8 PE=2 SV=2                                                    | sp Q6R6M 6 kDa    |      | 95% (D)  | unknown | 0 | 1 |
| 2323 | TRUE | Empty | Catenin CAS3 OS=Mus musculus GN=Cac3 PE=1 SV=1                                                                           | sp Q6R819 76 kDa  |      | 95% (D)  | unknown | 0 | 1 |
| 2324 | TRUE | Empty | COR1-NOT transcription complex subunit 10 OS=Mus musculus GN=Cnot10 PE=2 SV=1                                            | sp Q6B11 52 kDa   |      | 95% (NF) | unknown | 1 | 0 |
| 2325 | TRUE | Empty | Tubulin gamma-1 chain OS=Mus musculus GN=Tubg1 PE=1 SV=1                                                                 | sp P83887 51 kDa  |      | 95% (NF) | unknown | 1 | 0 |
| 2326 | TRUE | Empty | MCG130675 OS=Mus musculus GN=24103B10R08R PE=2 SV=1                                                                      | tr B2RPH 84 kDa   |      | 95% (NF) | unknown | 1 | 0 |
| 2327 | TRUE | Empty | Urmethyltransferase-associated protein 32 OS=Mus musculus GN=Uspat32 PE=1 SV=1                                           | sp Q6CR1 37 kDa   |      | 95% (D)  | unknown | 0 | 1 |
| 2328 | TRUE | Empty | Protein EFR3 homolog A OS=Mus musculus GN=Efr3a PE=1 SV=1                                                                | sp Q6R66 93 kDa   |      | 95% (D)  | unknown | 0 | 1 |
| 2329 | TRUE | Empty | Ubiquitin carboxyl-terminal hydrolase 48 OS=Mus musculus GN=Usp48 PE=2 SV=1                                              | tr JA2AL9 119 kDa |      | 95% (D)  | unknown | 0 | 1 |
| 2330 | TRUE | Empty | DNA-directed RNA polymerase 1 subunit RPA4F OS=Mus musculus GN=Polr2e PE=1 SV=2                                          | sp Q6R20 254 kDa  |      | 95% (D)  | unknown | 0 | 1 |
| 2331 | TRUE | Empty | Chromosomal membrane protein 118 OS=Mus musculus GN=Cmp118 PE=2 SV=1                                                     | sp Q6Z22 226 kDa  |      | 95% (D)  | unknown | 0 | 1 |
| 2332 | TRUE | Empty | Leucine-rich repeat-containing protein 16A (Fragment) OS=Mus musculus GN=Lrrc16a PE=2 SV=1                               | tr F7A271 103 kDa |      | 95% (D)  | unknown | 0 | 1 |
| 2333 | TRUE | Empty | Exosome complex component RRP4 OS=Mus musculus GN=Exoc2 PE=2 SV=1                                                        | sp Q6R6V 33 kDa   |      | 95% (NF) | unknown | 1 | 0 |
| 2334 | TRUE | Empty | Stromal interaction molecule 1 OS=Mus musculus GN=Stim1 PE=1 SV=2                                                        | sp P7036 78 kDa   |      | 95% (D)  | unknown | 0 | 1 |
| 2335 | TRUE | Empty | Channel sperm-associated protein 2 OS=Mus musculus GN=Caspe2 PE=1 SV=2                                                   | sp Q4A8R 66 kDa   |      | 95% (D)  | unknown | 0 | 1 |
| 2336 | TRUE | Empty | Myeloid leukemia factor 2 OS=Mus musculus GN=Mlf2 PE=1 SV=1                                                              | sp Q6JXK 28 kDa   |      | 95% (D)  | unknown | 0 | 2 |
| 2337 | TRUE | Empty | Zinc finger protein G2 (Fragment) OS=Mus musculus GN=Zfp62 PE=2 SV=1                                                     | tr J35Z31 102 kDa |      | 95% (D)  | unknown | 0 | 2 |
| 2338 | TRUE | Empty | Small shock transcription factor, 1 fusion 2 OS=Mus musculus GN=Stsf2 PE=2 SV=1                                          | tr Q6J97 44 kDa   | TRUE | 95% (D)  | unknown | 0 | 2 |
| 2339 | TRUE | Empty | Cullin-2 (Fragment) OS=Mus musculus GN=Cul2 PE=2 SV=1                                                                    | tr JCYT5 68 kDa   |      | 95% (NF) | unknown | 2 | 0 |
| 2340 | TRUE | Empty | Spermatogenesis-associated protein 4 OS=Mus musculus GN=Spata4 PE=2 SV=1                                                 | sp Q6K3V 34 kDa   |      | 95% (D)  | unknown | 0 | 2 |
| 2341 | TRUE | Empty | 1-acyl-sn-glycerol 3-phosphate acyltransferase gamma OS=Mus musculus GN=Agpat3 PE=1 SV=2                                 | sp Q6O51 143 kDa  | TRUE | 95% (NF) | unknown | 2 | 0 |
| 2342 | TRUE | Empty | General transcription factor III subunit OS=Mus musculus GN=Gtf2h1 PE=2 SV=1                                             | sp Q7042 252 kDa  |      | 95% (D)  | unknown | 2 | 0 |
| 2343 | TRUE | Empty | Serine-specific protease 7 OS=Mus musculus GN=Senp7 PE=2 SV=1                                                            | sp Q6B811 6 kDa   |      | 95% (D)  | unknown | 0 | 2 |
| 2344 | TRUE | Empty | Methylmalonate-semialdehyde dehydrogenase (acylating), mitochondrial OS=Mus musculus GN=Alh6a1 PE=1 SV=1                 | sp Q6Q2U5 8 kDa   |      | 95% (NF) | unknown | 2 | 0 |
| 2345 | TRUE | Empty | Tax1-binding protein 1 homolog OS=Mus musculus GN=Tax1bp1 PE=1 SV=2                                                      | sp Q6K3C94 3 kDa  |      | 95% (D)  | unknown | 0 | 2 |
| 2346 | TRUE | Empty | Protein tyrosine phosphatase L1-associated protein 1 OS=Mus musculus GN=Ctpp1 PE=1 SV=1                                  | sp Q6N64 53 kDa   |      | 95% (D)  | unknown | 1 | 0 |
| 2347 | TRUE | Empty | Sorbin and SH3 domain-containing protein 1 OS=Mus musculus GN=Sortb1 PE=1 SV=2                                           | sp Q6241 143 kDa  | TRUE | 95% (D)  | unknown | 0 | 1 |
| 2348 | TRUE | Empty | LSM domain-containing protein 1 OS=Mus musculus GN=Lmd1 PE=2 SV=1                                                        | sp Q6R2U 13 kDa   |      | 95% (NF) | unknown | 1 | 0 |
| 2349 | TRUE | Empty | Pyruvate S-carboxylase reductase 2 OS=Mus musculus GN=Pyco2 PE=2 SV=1                                                    | sp Q6Z2Q 34 kDa   |      | 95% (NF) | unknown | 1 | 0 |
| 2350 | TRUE | Empty | Probable arginine-tRNA ligase, mitochondrial OS=Mus musculus GN=Carp2 PE=2 SV=1                                          | sp Q6J1U 65 kDa   | TRUE | 95% (D)  | unknown | 1 | 0 |
| 2351 | TRUE | Empty | Centromere protein P OS=Mus musculus GN=Cenpp PE=2 SV=1                                                                  | sp Q6C2P 23 kDa   |      | 95% (D)  | unknown | 0 | 1 |
| 2352 | TRUE | Empty | Sortilin OS=Mus musculus GN=Sort1 PE=1 SV=1                                                                              | sp Q6PHU 91 kDa   |      | 95% (D)  | unknown | 0 | 1 |
| 2353 | TRUE | Empty | Transcription initiation factor 3B OS=Mus musculus GN=Taf11 PE=2 SV=2                                                    | sp Q6B0V 214 kDa  |      | 95% (D)  | unknown | 0 | 2 |
| 2354 | TRUE | Empty | Drebrin OS=Mus musculus GN=Dbr1 PE=1 SV=4                                                                                | sp Q6R0K 77 kDa   | TRUE | 95% (D)  | unknown | 1 | 0 |
| 2355 | TRUE | Empty | E1 SUMO-protein ligase PIAS2 OS=Mus musculus GN=Piap2 PE=1 SV=2                                                          | sp Q6S0D 68 kDa   |      | 95% (D)  | unknown | 0 | 1 |
| 2356 | TRUE | Empty | Alanine aminotransferase 2 OS=Mus musculus GN=Gat2 PE=1 SV=1                                                             | sp Q6RGT5 8 kDa   | TRUE | 95% (D)  | unknown | 1 | 0 |
| 2357 | TRUE | Empty | Something about silencing protein 10 OS=Mus musculus GN=Silp3 PE=1 SV=1                                                  | sp Q6H11 53 kDa   |      | 95% (D)  | unknown | 0 | 1 |
| 2358 | TRUE | Empty | Protein phosphatase (NM2F) OS=Mus musculus GN=Acta1 PE=1 SV=3                                                            | sp Q6NH6 37 kDa   | TRUE | 95% (D)  | unknown | 0 | 1 |
| 2359 | TRUE | Empty | Protein 933011020R8R (Fragment) OS=Mus musculus GN=933011020R8R PE=2 SV=1                                                | tr E9QZQ 164 kDa  |      | 95% (D)  | unknown | 0 | 1 |
| 2360 | TRUE | Empty | Palatin-like phospholipase domain-containing protein 7 OS=Mus musculus GN=Plagl7 PE=1 SV=1                               | sp JA2AB 150 kDa  |      | 95% (D)  | unknown | 0 | 1 |



|      |      |       |                                                                                                        |              |         |      |       |         |         |   |   |
|------|------|-------|--------------------------------------------------------------------------------------------------------|--------------|---------|------|-------|---------|---------|---|---|
| 2409 | TRUE | Empty | Protein FAM78A OS=Mus musculus GN=Fam78a PE=2 SV=1                                                     | sp Q8C51232  | kDa     | 95%  | (0.0) | unknown | 0       | 1 |   |
| 2410 | TRUE | Empty | MCG127384 OS=Mus musculus GN=181000945Rk PE=2 SV=1                                                     | tr Q8D917    | 14 kDa  | 95%  | (NF)  | unknown | 1       | 0 |   |
| 2411 | TRUE | Empty | Exon1 complex component 4 OS=Mus musculus GN=Exon1 PE=2 SV=1                                           | tr Q8C819    | 57 kDa  | TRUE | 95%   | (0.0)   | unknown | 0 | 1 |
| 2412 | TRUE | Empty | NADH dehydrogenase [ubiquinone] iron-sulfur protein 5 OS=Mus musculus GN=Ndufs5 PE=1 SV=3              | sp Q091Y9    | 13 kDa  | 95%  | (NF)  | unknown | 1       | 0 |   |
| 2413 | TRUE | Empty | Complement component 1 Q subcomponent-binding protein, mitochondrial OS=Mus musculus GN=C1qb PE=1 SV=1 | sp Q355831   | 3 kDa   | 95%  | (NF)  | unknown | 1       | 0 |   |
| 2414 | TRUE | Empty | Lactate dehydrogenase B chain OS=Mus musculus GN=Ldhb PE=1 SV=2                                        | sp P16153    | 37 kDa  | TRUE | 95%   | (NF)    | unknown | 2 | 0 |
| 2415 | TRUE | Empty | Chymase OS=Mus musculus GN=Cma1 PE=1 SV=2                                                              | sp P18444    | 28 kDa  | 95%  | (NF)  | unknown | 2       | 0 |   |
| 2416 | TRUE | Empty | Bifunctional arginine demethylase and lysyl-hydroxylase JMJD6 OS=Mus musculus GN=Jmjd6 PE=1 SV=2       | sp Q9ER15    | 47 kDa  | 95%  | (NF)  | unknown | 1       | 0 |   |
| 2417 | TRUE | Empty | ATP synthase subunit gamma OS=Mus musculus GN=Atg5c1 PE=2 SV=1                                         | tr JAZAKU9   | 33 kDa  | TRUE | 95%   | (NF)    | unknown | 2 | 0 |
| 2418 | TRUE | Empty | Surfeit locus protein 6 OS=Mus musculus GN=Surf6 PE=2 SV=1                                             | tr JAZALAL   | 24 kDa  | TRUE | 95%   | (NF)    | unknown | 2 | 0 |
| 2419 | TRUE | Empty | Pre-mRNA 3'-end-processing factor FPI OS=Mus musculus GN=Figl1 PE=2 SV=1                               | tr D32161    | 59 kDa  | TRUE | 95%   | (NF)    | unknown | 2 | 0 |
| 2420 | TRUE | Empty | Leucine zipper putative tumor suppressor 1 OS=Mus musculus GN=Ltts1 PE=2 SV=3                          | sp P60853    | 67 kDa  | 95%  | (0.0) | unknown | 0       | 2 |   |
| 2421 | TRUE | Empty | RRP12 like protein OS=Mus musculus GN=Rrp12 PE=1 SV=1                                                  | sp Q8P58143  | kDa     | 95%  | (0.0) | unknown | 0       | 1 |   |
| 2422 | TRUE | Empty | Cytoskeleton-associated protein 2 like OS=Mus musculus GN=Ckap2l PE=2 SV=1                             | sp Q7T57483  | kDa     | 95%  | (0.0) | unknown | 0       | 2 |   |
| 2423 | TRUE | Empty | F-box only protein 28 OS=Mus musculus GN=Fbxo28 PE=2 SV=1                                              | sp Q8B8G4    | 41 kDa  | 95%  | (0.0) | unknown | 0       | 1 |   |
| 2424 | TRUE | Empty | ATP-dependent RNA helicase DDX54 OS=Mus musculus GN=DDx54 PE=1 SV=1                                    | sp Q8K4L98   | kDa     | 95%  | (0.0) | unknown | 0       | 2 |   |
| 2425 | TRUE | Empty | Non-POU domain-containing octamer-binding protein OS=Mus musculus GN=Nono PE=1 SV=3                    | sp Q9N84855  | kDa     | 95%  | (0.0) | unknown | 0       | 1 |   |
| 2426 | TRUE | Empty | Mitochondrial import receptor subunit TOM20 homolog OS=Mus musculus GN=Tom20 PE=1 SV=1                 | sp Q9SC2156  | kDa     | 95%  | (0.0) | unknown | 0       | 1 |   |
| 2427 | TRUE | Empty | Protein Gm6489 OS=Mus musculus GN=Gm6489 PE=4 SV=1                                                     | tr J3QNS9    | 28 kDa  | 95%  | (0.0) | unknown | 0       | 1 |   |
| 2428 | TRUE | Empty | Hepatoma derived growth factor like 1 OS=Mus musculus GN=Hdgf1 PE=2 SV=1                               | tr Q2ZVPS    | 32 kDa  | 95%  | (0.0) | unknown | 0       | 1 |   |
| 2429 | TRUE | Empty | Protein 4930504D13Rk OS=Mus musculus GN=4930504D13Rk PE=2 SV=1                                         | tr Q8C529    | 16 kDa  | 95%  | (0.0) | unknown | 0       | 2 |   |
| 2430 | TRUE | Empty | MCG8551 OS=Mus musculus GN=7700213H15Rk PE=2 SV=1                                                      | sp Q280C538  | kDa     | 95%  | (0.0) | unknown | 0       | 2 |   |
| 2431 | TRUE | Empty | Proenkephalin-A OS=Mus musculus GN=Penk PE=2 SV=2                                                      | tr P22005    | 31 kDa  | 95%  | (NF)  | unknown | 1       | 0 |   |
| 2432 | TRUE | Empty | FUN14 domain-containing protein 2 OS=Mus musculus GN=Fundc2 PE=2 SV=1                                  | sp Q906K17   | kDa     | 95%  | (0.0) | unknown | 0       | 2 |   |
| 2433 | TRUE | Empty | F-box like WD repeat-containing protein TBLX1 OS=Mus musculus GN=Tblx1 PE=2 SV=2                       | tr Q2QKQ     | 157 kDa | TRUE | 95%   | (0.0)   | unknown | 0 | 1 |
| 2434 | TRUE | Empty | Trafficking protein particle complex subunit 12 OS=Mus musculus GN=Trappc12 PE=1 SV=2                  | sp Q8K248    | 86 kDa  | TRUE | 95%   | (0.0)   | unknown | 0 | 1 |
| 2435 | TRUE | Empty | ADAM6b OS=Mus musculus GN=Adam6b PE=1 SV=1                                                             | tr Q6M1H75   | kDa     | TRUE | 95%   | (0.0)   | unknown | 0 | 1 |
| 2436 | TRUE | Empty | Tubulin beta-1 chain OS=Mus musculus GN=Tubb1 PE=1 SV=1                                                | sp AAQZ050   | kDa     | TRUE | 95%   | (NF)    | unknown | 2 | 0 |
| 2437 | TRUE | Empty | Protein Fam98c (Fragment) OS=Mus musculus GN=Fam98c PE=4 SV=1                                          | tr F6ZV22    | 23 kDa  | TRUE | 95%   | (NF)    | unknown | 2 | 0 |
| 2438 | TRUE | Empty | Syntaxin-5 homophilin 5-methyltransferase 1 OS=Mus musculus GN=Stx5 PE=2 SV=1                          | sp Q284045   | kDa     | 95%  | (0.0) | unknown | 0       | 2 |   |
| 2439 | TRUE | Empty | Protein-glutamine gamma-glutamyltransferase 2 OS=Mus musculus GN=Tgm2 PE=1 SV=4                        | sp P21981    | 77 kDa  | 95%  | (NF)  | unknown | 1       | 0 |   |
| 2440 | TRUE | Empty | Haloacid dehalogenase-like hydrolase domain-containing protein 2 OS=Mus musculus GN=Hhdh2 PE=1 SV=2    | sp Q3UGC6    | 29 kDa  | 95%  | (NF)  | unknown | 1       | 0 |   |
| 2441 | TRUE | Empty | Beta-actin-like protein 2 OS=Mus musculus GN=Actb2 PE=1 SV=1                                           | sp Q8B8T42   | kDa     | TRUE | 95%   | (NF)    | unknown | 0 | 1 |
| 2442 | TRUE | Empty | WD repeat-containing protein 26 OS=Mus musculus GN=Wdr26 PE=1 SV=3                                     | sp Q8K6G73   | kDa     | 95%  | (NF)  | unknown | 1       | 0 |   |
| 2443 | TRUE | Empty | E1A-binding protein p400 OS=Mus musculus GN=Ep400 PE=1 SV=3                                            | sp Q8CH18    | 337 kDa | TRUE | 95%   | (NF)    | unknown | 1 | 0 |
| 2444 | TRUE | Empty | 39S ribosomal protein L50, mitochondrial OS=Mus musculus GN=MrpL50 PE=2 SV=2                           | sp Q8VDT18   | kDa     | 95%  | (NF)  | unknown | 1       | 0 |   |
| 2445 | TRUE | Empty | Cdk5 regulatory subunit-associated protein 3 OS=Mus musculus GN=Cdk5rap3 PE=2 SV=1                     | sp Q9M9457   | kDa     | 95%  | (NF)  | unknown | 1       | 0 |   |
| 2446 | TRUE | Empty | Cytoplasmic protein NCS1 OS=Mus musculus GN=Ncs1 PE=1 SV=1                                             | sp Q9P643    | 43 kDa  | 95%  | (NF)  | unknown | 1       | 0 |   |
| 2447 | TRUE | Empty | Ras-related protein Rab-5A OS=Mus musculus GN=Rab5a PE=1 SV=1                                          | sp Q9CDD     | 24 kDa  | TRUE | 95%   | (NF)    | unknown | 1 | 0 |
| 2448 | TRUE | Empty | Uncharacterized protein C7orf50 homolog OS=Mus musculus GN=C7orf50 PE=2 SV=3                           | sp Q2XK122   | kDa     | 95%  | (NF)  | unknown | 1       | 0 |   |
| 2449 | TRUE | Empty | Beta-taxin-2 OS=Mus musculus GN=Btax2 PE=1 SV=1                                                        | sp Q9DQA     | 33 kDa  | 95%  | (NF)  | unknown | 1       | 0 |   |
| 2450 | TRUE | Empty | Charged multivesicular body protein 5 OS=Mus musculus GN=Chmp5 PE=2 SV=1                               | sp Q9T5925   | kDa     | 95%  | (NF)  | unknown | 1       | 0 |   |
| 2451 | TRUE | Empty | Uncharacterized protein Czorf81 homolog OS=Mus musculus GN=Czor81 PE=2 SV=3                            | sp Q9DAQ     | 66 kDa  | 95%  | (NF)  | unknown | 1       | 0 |   |
| 2452 | TRUE | Empty | Eukaryotic translation initiation factor 3 subunit K OS=Mus musculus GN=EIF3k PE=1 SV=1                | sp Q908T25   | 225 kDa | 95%  | (NF)  | unknown | 1       | 0 |   |
| 2453 | TRUE | Empty | SMAD-activating enzyme subunit 1 OS=Mus musculus GN=Sa1 PE=2 SV=1                                      | sp Q9R1T239  | kDa     | 95%  | (NF)  | unknown | 1       | 0 |   |
| 2454 | TRUE | Empty | Protein 1700229H14Rk OS=Mus musculus GN=1700229H14Rk PE=2 SV=1                                         | tr EPY363    | 26 kDa  | 95%  | (NF)  | unknown | 1       | 0 |   |
| 2455 | TRUE | Empty | AcyI-protein thioesterase 1 (Fragment) OS=Mus musculus GN=Lyp1a PE=4 SV=1                              | tr J3QK48    | 23 kDa  | TRUE | 95%   | (NF)    | unknown | 1 | 0 |
| 2456 | TRUE | Empty | 5'-AMP-activated protein kinase subunit gamma-2 OS=Mus musculus GN=Pfkag2 PE=2 SV=1                    | tr Q8BQJ6    | 50 kDa  | TRUE | 95%   | (NF)    | unknown | 1 | 0 |
| 2457 | TRUE | Empty | Probable inactive protein kinase-like protein sgR71 homolog OS=Mus musculus GN=sgR71 PE=2 SV=3         | sp Q8BU131   | kDa     | TRUE | 95%   | (0.0)   | unknown | 0 | 1 |
| 2458 | TRUE | Empty | Uncharacterized protein C1orf177 homolog OS=Mus musculus GN=C1orf177 PE=1 SV=1                         | sp AAZAVQ    | 48 kDa  | 95%  | (0.0) | unknown | 0       | 1 |   |
| 2459 | TRUE | Empty | Non-histone chromosomal protein HMG-14 OS=Mus musculus GN=Hmg14 PE=1 SV=2                              | sp P18608    | 10 kDa  | 95%  | (0.0) | unknown | 0       | 1 |   |
| 2460 | TRUE | Empty | DNA-directed RNA polymerases 1, II, and III subunit RPABC2 OS=Mus musculus GN=Rpbc2 PE=2 SV=1          | sp P12129    | 14 kDa  | 95%  | (0.0) | unknown | 0       | 1 |   |
| 2461 | TRUE | Empty | Related GTP-binding protein RhoB OS=Mus musculus GN=RhoB PE=1 SV=1                                     | sp P22747    | 22 kDa  | TRUE | 95%   | (0.0)   | unknown | 0 | 1 |
| 2462 | TRUE | Empty | DNA-directed RNA polymerases 1, II, and III subunit RPABC3 OS=Mus musculus GN=Rpbc3 PE=2 SV=1          | sp P22876    | 8 kDa   | 95%  | (0.0) | unknown | 0       | 1 |   |
| 2463 | TRUE | Empty | Ligand-dependent nuclear receptor corepressor-like protein OS=Mus musculus GN=Lcor2 PE=2 SV=1          | sp Q3JZ857   | kDa     | 95%  | (0.0) | unknown | 0       | 1 |   |
| 2464 | TRUE | Empty | Adrenocortical dysplasia protein OS=Mus musculus GN=Adc PE=1 SV=1                                      | sp Q2E1845   | kDa     | 95%  | (0.0) | unknown | 0       | 1 |   |
| 2465 | TRUE | Empty | Putative malate dehydrogenase 1B OS=Mus musculus GN=Mdh1b PE=2 SV=1                                    | sp Q28F04    | 56 kDa  | 95%  | (0.0) | unknown | 0       | 1 |   |
| 2466 | TRUE | Empty | WW domain-binding protein 4 OS=Mus musculus GN=Wbp4 PE=1 SV=4                                          | sp Q106148   | kDa     | 95%  | (0.0) | unknown | 0       | 1 |   |
| 2467 | TRUE | Empty | Ubiquitin-2 OS=Mus musculus GN=Ubn2 PE=1 SV=2                                                          | sp Q80WC     | 142 kDa | TRUE | 95%   | (0.0)   | unknown | 0 | 1 |
| 2468 | TRUE | Empty | Probable inactive protein kinase-like protein sgR71 homolog OS=Mus musculus GN=sgR71 PE=2 SV=3         | sp Q80Y975   | kDa     | 95%  | (0.0) | unknown | 0       | 1 |   |
| 2469 | TRUE | Empty | General transcription factor 3C polypeptide 2 OS=Mus musculus GN=Gtf3c2 PE=1 SV=2                      | sp Q8B174100 | kDa     | 95%  | (0.0) | unknown | 0       | 1 |   |
| 2470 | TRUE | Empty | Protein FAM92A1 OS=Mus musculus GN=Fam92a1 PE=1 SV=1                                                   | sp Q8BP240   | kDa     | 95%  | (0.0) | unknown | 0       | 1 |   |
| 2471 | TRUE | Empty | Zinc finger MYND domain-containing protein 15 OS=Mus musculus GN=Zmynd15 PE=1 SV=1                     | sp Q8CR182   | kDa     | 95%  | (0.0) | unknown | 0       | 1 |   |
| 2472 | TRUE | Empty | Protein C21orf2 homolog OS=Mus musculus GN=C21orf2 PE=2 SV=1                                           | sp Q8C6J28   | kDa     | 95%  | (0.0) | unknown | 0       | 1 |   |
| 2473 | TRUE | Empty | BRCA1-A complex subunit BRE OS=Mus musculus GN=Bre PE=1 SV=2                                           | sp Q8K3W     | 44 kDa  | 95%  | (0.0) | unknown | 0       | 1 |   |
| 2474 | TRUE | Empty | Serine/threonine-protein kinase RIO1 OS=Mus musculus GN=Rio1 PE=2 SV=2                                 | sp Q922Q65   | kDa     | 95%  | (0.0) | unknown | 0       | 1 |   |
| 2475 | TRUE | Empty | Zinc finger protein 281 OS=Mus musculus GN=Zfp281 PE=1 SV=1                                            | sp Q9R15     | 97 kDa  | 95%  | (0.0) | unknown | 0       | 1 |   |
| 2476 | TRUE | Empty | 39S ribosomal protein L27, mitochondrial OS=Mus musculus GN=MrpL27 PE=2 SV=1                           | sp Q9N9616   | kDa     | 95%  | (0.0) | unknown | 0       | 1 |   |
| 2477 | TRUE | Empty | Tripartite motif-containing protein 26 OS=Mus musculus GN=Trim26 PE=2 SV=3                             | sp Q9P99163  | kDa     | 95%  | (0.0) | unknown | 0       | 1 |   |
| 2478 | TRUE | Empty | Coiled-coil domain-containing glutamate-rich protein 1 OS=Mus musculus GN=Ccer1 PE=2 SV=1              | sp Q9CQL46   | kDa     | 95%  | (0.0) | unknown | 0       | 1 |   |
| 2479 | TRUE | Empty | YEATS domain-containing protein 4 OS=Mus musculus GN=Yeata4 PE=2 SV=1                                  | sp Q2CR127   | kDa     | 95%  | (0.0) | unknown | 0       | 1 |   |
| 2480 | TRUE | Empty | Trafficking protein particle complex subunit 6b OS=Mus musculus GN=Trapp6b PE=2 SV=1                   | sp Q903818   | kDa     | 95%  | (0.0) | unknown | 0       | 1 |   |
| 2481 | TRUE | Empty | Meiosis-specific with OB domain-containing protein OS=Mus musculus GN=Meiob PE=2 SV=3                  | sp Q9S01513  | kDa     | 95%  | (0.0) | unknown | 0       | 1 |   |
| 2482 | TRUE | Empty | Exosome complex component CSL4 OS=Mus musculus GN=Exoc1 PE=2 SV=1                                      | sp Q9DAU21   | kDa     | 95%  | (0.0) | unknown | 0       | 1 |   |
| 2483 | TRUE | Empty | F-box/WD repeat-containing protein 5 OS=Mus musculus GN=Fbw5 PE=1 SV=1                                 | sp Q2QW65    | kDa     | 95%  | (0.0) | unknown | 0       | 1 |   |
| 2484 | TRUE | Empty | Mitochondrial import receptor subunit TOM40 homolog OS=Mus musculus GN=Tom40 PE=1 SV=3                 | sp Q9DQA     | 28 kDa  | 95%  | (0.0) | unknown | 0       | 1 |   |
| 2485 | TRUE | Empty | Lysine-specific demethylase PHF2 OS=Mus musculus GN=Phf2 PE=1 SV=2                                     | sp Q9WU121   | kDa     | 95%  | (0.0) | unknown | 0       | 1 |   |
| 2486 | TRUE | Empty | Dynactin subunit 3 OS=Mus musculus GN=Dctn3 PE=2 SV=2                                                  | sp Q9Z0T21   | 24 kDa  | 95%  | (0.0) | unknown | 0       | 1 |   |
| 2487 | TRUE | Empty | 39S ribosomal protein L40, mitochondrial OS=Mus musculus GN=MrpL40 PE=2 SV=2                           | sp Q2C2C2    | 24 kDa  | 95%  | (0.0) | unknown | 0       | 1 |   |
| 2488 | TRUE | Empty | Dynein heavy chain 17, axonemal OS=Mus musculus GN=Dnah17 PE=2 SV=1                                    | tr JAZ4519   | 24 kDa  | TRUE | 95%   | (0.0)   | unknown | 0 | 1 |
| 2489 | TRUE | Empty | MCG1031886 OS=Mus musculus GN=Text13a PE=4 SV=1                                                        | tr JAZAF59   | 43 kDa  | 95%  | (0.0) | unknown | 0       | 1 |   |
| 2490 | TRUE | Empty | DMRT-like family C1b OS=Mus musculus GN=Dmrt1c1 PE=2 SV=1                                              | tr JAZA913   | 26 kDa  | 95%  | (0.0) | unknown | 0       | 1 |   |
| 2491 | TRUE | Empty | Transcription elongation factor, mitochondrial (Fragment) OS=Mus musculus GN=Tefm PE=2 SV=1            | tr B7ZCZ     | 25 kDa  | TRUE | 95%   | (0.0)   | unknown | 0 | 1 |
| 2492 | TRUE | Empty | Protein lock OS=Mus musculus GN=Igapk PE=2 SV=1                                                        | tr D3Y131    | 33 kDa  | 95%  | (0.0) | unknown | 0       | 1 |   |
| 2493 | TRUE | Empty | Protein Tsp10c OS=Mus musculus GN=Tsp10c PE=2 SV=1                                                     | tr IQ9Q46    | 54 kDa  | TRUE | 95%   | (0.0)   | unknown | 0 | 1 |
| 2494 | TRUE | Empty | Protein 170012301Rk OS=Mus musculus GN=170012301Rk PE=2 SV=1                                           | tr IQ9Q44    | 29 kDa  | 95%  | (0.0) | unknown | 0       | 1 |   |
| 2495 | TRUE | Empty | Probable subunit polyglutamylase TLLD (Fragment) OS=Mus musculus GN=TL09 PE=2 SV=1                     | tr F6ZM19    | kDa     | TRUE | 95%   | (0.0)   | unknown | 0 | 1 |
| 2496 | TRUE | Empty | Protein Atr9 (Fragment) OS=Mus musculus GN=Atr9 PE=2 SV=1                                              | tr F7BE40    | 15 kDa  | TRUE | 95%   | (0.0)   | unknown | 0 | 1 |
| 2497 | TRUE | Empty | Protein Bbs1 OS=Mus musculus GN=Bbs1 PE=2 SV=1                                                         | tr Q3V3N765  | kDa     | 95%  | (0.0) | unknown | 0       | 1 |   |
| 2498 | TRUE | Empty | 6-phosphogluconolactonase OS=Mus musculus GN=Pglb PE=2 SV=1                                            | sp Q8C8G23   | kDa     | 95%  | (0.0) | unknown | 0       | 1 |   |
| 2499 | TRUE | Empty | Protein 492150400Rk OS=Mus musculus GN=492150400Rk PE=2 SV=1                                           | sp Q8CET7    | 65 kDa  | 95%  | (0.0) | unknown | 0       | 1 |   |
| 2500 | TRUE | Empty | Larp2 protein OS=Mus musculus GN=Larp2 PE=2 SV=1                                                       | tr Q8R3F0    | 39 kDa  | 95%  | (0.0) | unknown | 0       | 1 |   |
| 2501 | TRUE | Empty | Cellular nucleic acid binding protein 2 OS=Mus musculus GN=Czchc13 PE=2 SV=1                           | tr Q90548    | 19 kDa  | 95%  | (0.0) | unknown | 0       | 1 |   |
| 2502 | TRUE | Empty | Ankrd36 protein OS=Mus musculus GN=Ankrd36 PE=2 SV=1                                                   | tr Q9CQ29    | 34 kDa  | TRUE | 95%   | (0.0)   | unknown | 0 | 1 |
| 2503 | TRUE | Empty | Calcium-activated potassium channel subunit alpha 1 OS=Mus musculus GN=Kcma1 PE=2 SV=2                 | tr F7H4D     | 119 kDa | 95%  | (0.0) | unknown | 0       | 1 |   |
| 2504 | TRUE | Empty | Moloney leukemia virus 10-like 1 OS=Mus musculus GN=Mov10l1 PE=4 SV=1                                  | tr G1X8T0    | 133 kDa | 95%  | (NF)  | unknown | 1       | 0 |   |

END OF FILE
